1 **Identification of a novel cobamide remodeling enzyme in the beneficial human gut bacterium**  
2 ***Akkermansia muciniphila***

3  
4 Kenny C. Mok<sup>a</sup>, Olga M. Sokolovskaya<sup>a</sup>, Alexa M. Nicolas<sup>a</sup>, Zachary F. Hallberg<sup>a</sup>, Adam  
5 Deutschbauer<sup>b</sup>, Hans K. Carlson<sup>b</sup>, and Michiko E. Taga<sup>a#</sup>

6  
7 <sup>a</sup>Department of Plant & Microbial Biology, University of California, Berkeley, Berkeley, CA

8  
9 <sup>b</sup>Environmental Genomics and Systems Biology Division, Lawrence Berkeley National  
10 Laboratory, Berkeley, CA

11  
12 #Correspondence to [taga@berkeley.edu](mailto:taga@berkeley.edu)

13  
14 Running title: Cobamide remodeling in a beneficial gut bacterium

15  
16 Abstract word count: 233

17  
18 Text word count: 6,114

19 **Abstract**

20

21 The beneficial human gut bacterium *Akkermansia muciniphila* provides metabolites to other  
22 members of the gut microbiota by breaking down host mucin, but most of its other metabolic  
23 functions have not been investigated. *A. muciniphila* is known to use cobamides, the vitamin B<sub>12</sub>  
24 family of cofactors with structural diversity in the lower ligand, though the specific cobamides it  
25 can use have not been examined. We found that growth of *A. muciniphila* strain Muc<sup>T</sup> was nearly  
26 identical with each of seven cobamides tested, in contrast to nearly all bacteria that have been  
27 studied. Unexpectedly, this promiscuity is due to cobamide remodeling – the removal and  
28 replacement of the lower ligand – despite the absence of the canonical remodeling enzyme CbiZ  
29 in *A. muciniphila*. We identified a novel enzyme, CbiR, that is capable of initiating the remodeling  
30 process by hydrolyzing the phosphoribosyl bond in the nucleotide loop of cobamides. CbiR does  
31 not share homology with other cobamide remodeling enzymes or B<sub>12</sub>-binding domains, and instead  
32 is a member of the AP endonuclease 2 enzyme superfamily. We speculate that CbiR enables  
33 bacteria to repurpose cobamides they otherwise cannot use in order to grow under a cobamide-  
34 requiring condition; this function was confirmed by heterologous expression of *cbiR* in *E. coli*.  
35 Homologs of CbiR are found in over 200 microbial taxa across 22 phyla, suggesting that many  
36 bacteria may use CbiR to gain access to the diverse cobamides present in their environment.

37

38 **Importance**

39

40 Cobamides, the vitamin B<sub>12</sub> family of cobalt-containing cofactors, are required for metabolism in  
41 all domains of life, including most bacteria. Cobamides have structural variability in the lower  
42 ligand, and selectivity for particular cobamides has been observed in most organisms studied to  
43 date. Here, we discover that the beneficial human gut bacterium *Akkermansia muciniphila* can use  
44 a diverse range of cobamides due to its ability to change the cobamide structure via “cobamide  
45 remodeling”. We identify and characterize the novel enzyme CbiR that is necessary for initiating  
46 the cobamide remodeling process. The discovery of this enzyme has implications not only for  
47 understanding the ecological role of *A. muciniphila* in the gut, but for other bacteria that carry this  
48 enzyme as well.

49

## 50 Introduction

51

52 The human gut microbiota is composed of diverse communities of microbes that play important  
53 roles in human health (1-4). Disruption of the composition of the microbiota, known as dysbiosis,  
54 is associated with numerous disease states (5-9). While the immense complexity and  
55 interindividual variability of the microbiota have made it challenging to identify the specific  
56 functions of most community members, particular taxa are starting to be linked to health and  
57 disease (10-12), with the bacterium *Akkermansia muciniphila* recently emerging as a beneficial  
58 microbe due to its distinctive metabolic capabilities (13, 14).

59

60 *A. muciniphila* is thought to benefit the host by inducing mucus production, improving gut barrier  
61 function, and stimulating a positive inflammatory response (15-24). *A. muciniphila* is one of few  
62 bacteria capable of using mucin, the main component of mucus, as a sole carbon, nitrogen, and  
63 energy source (25). Mucin degradation products released by *A. muciniphila* are used as carbon  
64 sources by butyrate-producing bacteria and likely other bacteria, and for this reason *A. muciniphila*  
65 is thought to be a keystone species in the gut (26, 27). In addition to providing metabolites to  
66 neighboring microbes, in coculture *A. muciniphila* can use a cobamide cofactor, pseudocobalamin  
67 (pCbl, Fig. 1A), provided by *Eubacterium hallii* for the production of propionate (26). Both  
68 butyrate and propionate positively affect host metabolism and immune function (28-30).

69

70 Cobamides are a family of cobalt-containing corrinoid cofactors that include vitamin B<sub>12</sub>  
71 (cobalamin, Cbl), an essential micronutrient for humans. Cobamides are required by organisms in  
72 all domains of life, but are synthesized only by a subset of prokaryotes (31-33). While some strains  
73 of *A. muciniphila* were shown or predicted to produce cobamides *de novo*, the type strain, Muc<sup>T</sup>,  
74 is incapable of *de novo* cobamide production (34). Instead, strain Muc<sup>T</sup> and most other *A.*  
75 *muciniphila* strains are predicted to be capable of cobinamide (Cbi, Fig. 1A) salvaging (33, 34), a  
76 process in which a cobamide is synthesized from the late precursor Cbi (35). Thus, the four  
77 cobamide-dependent metabolic pathways present in *A. muciniphila* function in most strains,  
78 including Muc<sup>T</sup>, only when a cobamide or a late precursor such as Cbi is provided by another  
79 organism. Several other human gut bacteria have similarly been found to use cobamide cofactors  
80 but are unable to produce them *de novo*, including *Bacteroides fragilis*, *Bacteroides*  
81 *thetaiotaomicron*, *Bacteroides vulgatus*, *Clostridioides difficile*, *Enterococcus faecalis*,  
82 *Escherichia coli*, and *Parabacteroides distasonis* (36-40). In addition to these specific examples,  
83 genomic analysis suggests that dependence on cobamide-producing microbes is widespread in the  
84 gut and other environments: 58% of human gut bacteria and 49% of all sequenced bacteria are  
85 predicted to use cobamides but lack the capacity to produce them (33).

86

87 A feature that sets cobamides apart from other enzyme cofactors is that different microbes produce  
88 structurally distinct cobamides (41). This variability is mostly limited to the lower ligand, which  
89 can be benzimidazolyl, purinyl, or phenolyl bases (Fig. 1C). Individual cobamide-producing  
90 bacteria typically synthesize only one type of cobamide, but microbial communities have been  
91 found to contain four to eight different cobamides or cobamide precursors (42-45). A study of 20  
92 human subjects showed that the human gut is dominated by the purinyl class of cobamides, with

93 benzimidazolyl and phenolyl cobamides and Cbi also present (42). The structural diversity in  
94 cobamides impacts growth and metabolism, as most organisms studied to date are selective in their  
95 cobamide use (39, 46-54). For example, the human gut bacterium *B. thetaiotaomicron* can use  
96 benzimidazolyl and purinyl, but not phenolyl, cobamides (37); *Dehalococcoides mccartyi* and  
97 most eukaryotic algae are selective for particular benzimidazolyl cobamides (55-57); and  
98 *Sporomusa ovata* requires phenolyl cobamides (58). Thus, microbes that depend on cobamides  
99 produced by others may struggle to grow in environments lacking their preferred cobamides.  
100 However, some organisms have evolved mechanisms of acquiring the specific cobamides that  
101 function in their metabolism. For example, bacterial cobamide uptake can be somewhat selective,  
102 as shown in a study in *B. thetaiotaomicron* (37). Another strategy used by some microbes is  
103 cobamide remodeling, the removal and replacement of the lower ligand.

104  
105 Cobamide remodeling was first described in *Rhodobacter sphaeroides* (59), but has also been  
106 observed in the bacteria *D. mccartyi* and *Vibrio cholerae* and the algae *Pavlova lutheri* and  
107 *Chlamydomonas reinhardtii* (45, 48, 55, 57). In each case, cobamide remodeling enables the  
108 organism to repurpose a cobamide that poorly supports growth. In *R. sphaeroides*, the cobamide  
109 remodeling process is initiated by the enzyme CbiZ, which hydrolyzes the amide bond adjacent to  
110 the aminopropanol linker (Fig. 1A) (59); in subsequent steps, cobamide biosynthesis is completed  
111 with a different lower ligand via the activity of six gene products, most of which are also required  
112 for Cbi salvaging. *In vitro*, *R. sphaeroides* CbiZ hydrolyzes pCbl but not Cbl (59). This specificity  
113 is thought to drive the conversion of pCbl, a cofactor that *R. sphaeroides* cannot use, into Cbl,  
114 which functions in its metabolism. *D. mccartyi* also has homologs of *cbiZ* (57), while cobamide  
115 remodeling in *V. cholerae* was recently shown to involve the cobamide biosynthesis enzyme CobS  
116 (48). The genes required for cobamide remodeling in algae have not been identified. Nevertheless,  
117 *A. muciniphila* does not encode a homolog of *cbiZ*, and therefore we assessed the cobamide  
118 selectivity of *A. muciniphila* strain Muc<sup>T</sup> to understand the cobamide metabolism of this beneficial  
119 gut bacterium.

120  
121 Here we show that *A. muciniphila* strain Muc<sup>T</sup> is able to grow equivalently when provided a variety  
122 of cobamides. We found that this lack of selectivity is due to the unexpected ability of *A.*  
123 *muciniphila* to remodel cobamides. We identified a previously uncharacterized phosphodiesterase  
124 in *A. muciniphila* that we named CbiR, which initiates the remodeling process by hydrolyzing  
125 cobamides. Heterologous expression in *E. coli* shows that CbiR expands access to a cobamide that  
126 does not otherwise support growth. Homologs of CbiR are present in the genomes of microbes in  
127 diverse habitats from 22 phyla, and phylogenetic analysis establishes CbiR as a new, distinct clade  
128 within the AP endonuclease 2 superfamily. These observations enhance the understanding of the  
129 metabolic roles of *A. muciniphila* and improve our ability to predict cobamide-dependent  
130 physiology in other bacteria.

## 131 132 **Results**

### 133 134 ***A. muciniphila* strain Muc<sup>T</sup> salvages Cbi to produce pCbl**

135

136 *A. muciniphila* strain Muc<sup>T</sup> lacks most of the genes required for cobamide synthesis and does not  
137 produce cobamides *de novo* (34), but it is predicted to be capable of Cbi salvaging (33). To test  
138 this prediction, we extracted corrinoids from *A. muciniphila* cultured with and without Cbi and  
139 analyzed the corrinoid composition of the samples by high-performance liquid chromatography  
140 (HPLC). When cultured without Cbi, no corrinoids were detected in the extractions (Fig. 2A).  
141 However, when Cbi was added to the growth medium, a cobamide with the same retention time  
142 and nearly identical UV-Vis spectrum to pCbl was detected by HPLC (Fig. 2A). Mass  
143 spectrometry (MS) analysis corroborated that this cobamide is pCbl (Fig. S1).

144

#### 145 ***A. muciniphila* strain Muc<sup>T</sup> does not show cobamide selectivity**

146

147 Having established that *A. muciniphila* strain Muc<sup>T</sup> cannot synthesize cobamides without the  
148 addition of a precursor, we next examined which cobamides it is capable of using by measuring  
149 growth in the presence of various cobamides under a cobamide-requiring condition. A homolog of  
150 the cobamide-dependent methionine synthase MetH is encoded in the genome of *A. muciniphila*.  
151 Because *A. muciniphila* lacks a homolog of the cobamide-independent methionine synthase MetE,  
152 growth in methionine-deplete medium is expected to require cobamide addition. We found this to  
153 be the case, as the addition of Cbi or any of the seven cobamides tested was necessary to support  
154 growth of *A. muciniphila* (Fig. 2B). Surprisingly, however, *A. muciniphila* shows essentially no  
155 cobamide selectivity, with less than twofold variation in the cobamide concentrations resulting in  
156 half-maximal growth (EC<sub>50</sub>) (Fig. 2B).

157

#### 158 ***A. muciniphila* strain Muc<sup>T</sup> remodels cobamides to pCbl**

159

160 The ability of all of the tested cobamides to support nearly identical growth of *A. muciniphila* could  
161 be due to promiscuity in its cobamide-dependent methionine synthase. Alternatively, *A.*  
162 *muciniphila* could remodel cobamides, despite the absence of a homolog of *cbiZ* in its genome. If  
163 cobamide remodeling occurs in *A. muciniphila*, exogenously supplied cobamides will be altered  
164 by the bacterium. Therefore, we extracted corrinoids from *A. muciniphila* cultures supplemented  
165 with Cbl, [Cre]Cba or [MeAde]Cba to determine whether the added cobamides could be recovered.  
166 HPLC analysis revealed that none of the Cbl or [Cre]Cba, and only half of the [MeAde]Cba,  
167 remained in the extractions. This loss of the added cobamide coincided with the appearance of a  
168 new cobamide that co-eluted with pCbl (Fig. 2C). MS analysis confirmed that this cobamide is  
169 indeed pCbl (Fig. S2). These results demonstrate that *A. muciniphila* remodels cobamides to pCbl.

170

#### 171 **Identification and characterization of a novel cobamide remodeling enzyme in *A. muciniphila***

172

173 The identification of cobamide remodeling activity despite the absence of a *cbiZ* homolog in the  
174 genome suggested that a novel enzyme capable of hydrolyzing cobamides is present in *A.*  
175 *muciniphila*. We reasoned that the gene encoding this enzyme could be located near the cobamide  
176 biosynthesis and salvaging genes *cobDQ*, *cbiB*, *cobT*, *cobS*, and *cobU*, some or all of which would  
177 be required for completion of the remodeling process. These five genes are found at a single locus  
178 in the *A. muciniphila* genome that also contains an ORF with unknown function, annotated as

179 Amuc\_1679 (Fig. 3A). Amuc\_1679 is predicted to encode a protein with a conserved ( $\beta/\alpha$ )<sub>8</sub> TIM  
180 barrel domain from the AP endonuclease 2 superfamily (pfam01261). This superfamily is  
181 composed of several enzymes including endonuclease IV, which hydrolyzes phosphodiester bonds  
182 at apurinic or apyrimidinic (AP) sites in DNA (60). The proximity of Amuc\_1679 to genes  
183 involved in cobamide biosynthesis and the presence of a phosphodiester bond connecting the lower  
184 ligand to the aminopropanol linker suggested that Amuc\_1679 might play a role in cobamide  
185 biology in *A. muciniphila*. Further, homologs of this gene in other bacteria are also found in loci  
186 containing similar cobamide biosynthesis enzymes (Fig. 3A, Fig. S3).

187  
188 To determine whether Amuc\_1679 encodes an enzyme that can hydrolyze cobamides, we  
189 overexpressed and purified Amuc\_1679 with N-terminal hexahistidine (His<sub>6</sub>) and maltose-binding  
190 protein (MBP) tags for analysis of its activity *in vitro* (Fig. S4A). First, we tested whether a new  
191 product was formed when the protein was incubated with coenzyme B<sub>12</sub> (AdoCbl), an active  
192 cofactor form of Cbl. We observed complete conversion of AdoCbl to a new corrinoid compound  
193 in reactions performed under anaerobic conditions (Fig. 3B). MS analysis showed that two reaction  
194 products, cobinamide-phosphate (Cbi-P) and  $\alpha$ -ribazole, were formed, indicating hydrolysis of the  
195 phosphoribosyl bond of AdoCbl (Fig. 3C, D). Notably, Amuc\_1679 targets a bond distinct from  
196 the enzyme CbiZ (Fig. 1A) (59). In keeping with the tradition of naming cobamide biosynthesis  
197 and remodeling enzymes with the “Cbi” prefix, we henceforth refer to Amuc\_1679 as CbiR.

198  
199 We were able to monitor CbiR activity continuously by measuring the rate of decrease in  
200 absorbance at 534 nm ( $A_{534}$ ), as the reaction is characterized by a change in the UV-Vis spectrum  
201 that reflects the loss of AdoCbl and formation of AdoCbi-P (Fig. 3E). With this method, we found  
202 that the reaction proceeded only in the absence of oxygen, and additionally that the reaction  
203 requires the reducing agent DTT and is inhibited by the metal chelator EDTA (Fig. S4B). Using  
204 the same method, we determined the reaction kinetics of His<sub>6</sub>-MBP-CbiR under steady-state  
205 conditions at a range of AdoCbl concentrations (Fig. 3F). Based on a fit to the Michaelis-Menten  
206 model, the reaction of His<sub>6</sub>-MBP-CbiR with AdoCbl exhibited a  $K_M$  and  $k_{cat}$  for AdoCbl of 194  
207  $\mu\text{M}$  and  $6.5 \text{ min}^{-1}$ , respectively. Similarly, His<sub>6</sub>-MBP-CbiR hydrolyzes MeCbl, the active cofactor  
208 form used by MetH and other methyltransferases, to MeCbi-P (Fig. S4C), with comparable kinetic  
209 parameters (Fig. S4D), indicating that AdoCbl and MeCbl are equally suitable substrates for His<sub>6</sub>-  
210 MBP-CbiR.

### 211 212 ***A. muciniphila* CbiR can hydrolyze several different cobamides *in vitro***

213  
214 To determine the substrate selectivity of CbiR, His<sub>6</sub>-MBP-CbiR activity was measured *in vitro*  
215 with seven different cobamides. Adenosylated cobamides with purinyl or phenolyl lower ligands  
216 do not show UV-Vis spectra distinct from AdoCbi-P under the reaction conditions, and thus  
217 activity was measured by HPLC. Each cobamide was completely converted to AdoCbi-P following  
218 an 18 h incubation, demonstrating that all of the cobamides are substrates for CbiR (Fig. 4A). The  
219 specific activities of His<sub>6</sub>-MBP-CbiR with each cobamide are similar, with 4-fold differences  
220 among the benzimidazolyl and purinyl cobamides and slightly higher activity with phenolyl  
221 cobamides (Fig. 4B). These specific activities are similar to, though slightly lower than that

222 previously reported for CbiZ with Ado-pCbl (70 nmol/mg/min, (59)), albeit under somewhat  
223 different reaction conditions.

224

### 225 **Expression of *cbiR* in *E. coli* enables expanded cobamide use**

226

227 Given that the product AdoCbi-P can be used as a precursor for construction of a different  
228 cobamide, we hypothesize that CbiR activity enables bacteria to remodel cobamides, and therefore  
229 to gain access to cobamides in the environment that they otherwise may not be able to use. Because  
230 methods for targeted inactivation of genes in *A. muciniphila* have not been established, we used  
231 engineered *E. coli* strains to test this hypothesis. Like *A. muciniphila* strain Muc<sup>T</sup>, *E. coli* MG1655  
232 cannot synthesize cobamides *de novo*, but its genome has the cobamide biosynthesis genes *cobT*,  
233 *cobS*, *cobU*, and *cobC* that should allow *E. coli* to convert AdoCbi-P into a cobamide (61). We  
234 first tested whether *A. muciniphila* CbiR is functional in *E. coli*. Indeed, expression of *cbiR* on a  
235 plasmid in a  $\Delta cobTSU \Delta cobC$  background results in the loss of added Cbl, pCbl, [MeAde]Cba,  
236 and [Cre]Cba and the formation of two new corrinoid compounds (Fig. 5A). One of the products  
237 co-elutes with AdoCbi-P (Fig. 5A), and MS analysis confirmed that the dominant ion matches the  
238 m/z expected for Cbi-P (Fig. S5A). The second product has an m/z consistent with Cbi (Fig. S5B),  
239 which likely forms intracellularly by hydrolysis of the phosphate group of AdoCbi-P. Neither  
240 product was detected in an *E. coli* strain containing the empty vector (Fig. 5A, dashed lines).  
241 Therefore, the activity of CbiR that we observed *in vitro* can be recapitulated in aerobically  
242 cultured *E. coli*.

243

244 Catabolism of ethanolamine in *E. coli* requires the cobamide-dependent enzyme ethanolamine  
245 ammonia lyase, which is capable of using Cbl as a cofactor but is not functional with [Cre]Cba  
246 (62). We took advantage of this selectivity to design a cobamide remodeling-dependent growth  
247 assay in *E. coli*. In minimal medium supplemented with [Cre]Cba and 5,6-dimethylbenzimidazole  
248 (DMB, the lower ligand of Cbl), with ethanolamine as the sole nitrogen source, *E. coli* should be  
249 able to grow only if it can remodel [Cre]Cba to Cbl. Cbl, as expected, promotes growth of *E. coli*  
250 under this condition regardless of whether *cbiR* is present (Fig. 5B). In contrast, when [Cre]Cba is  
251 added, growth is observed only in the strain expressing *cbiR*, suggesting that CbiR activity enables  
252 *E. coli* to convert [Cre]Cba into Cbl (Fig. 5B). A cobamide with a retention time and m/z matching  
253 that of Cbl was detected in a corrinoid extraction of *E. coli* grown with [Cre]Cba and DMB when  
254 expressing CbiR, confirming that cobamide remodeling to Cbl occurred (Fig. S6). These results  
255 demonstrate that expression of CbiR expands the range of cobamides accessible to *E. coli*, and  
256 suggests that cobamide remodeling may serve a similar purpose in *A. muciniphila*.

257

### 258 **CbiR is a member of the AP endonuclease 2 superfamily and is found in diverse bacteria**

259

260 Analysis of the sequence of CbiR revealed that it is not similar to CbiZ or *V. cholerae* CobS, the  
261 other enzymes known to have cobamide remodeling activity. Instead, CbiR is a member of the AP  
262 endonuclease 2 superfamily, which includes the enzymes endonuclease IV, 2-keto-myo-inositol  
263 dehydratase, xylose isomerase, and other sugar isomerases and epimerases. A phylogenetic tree of  
264 this superfamily shows that the CbiR homologs identified by a BLAST search that are encoded in

265 genomic loci containing cobamide biosynthesis genes form a single, distinct clade within the  
266 superfamily (Fig. 6A). Some of the biochemically characterized enzymes in the superfamily  
267 require metal cofactors for activity, and between one and three metal ions are found in nearly all  
268 X-ray crystal structures of enzymes from the superfamily (63-77). A metal cofactor may also be  
269 required for CbiR function; in addition to the inhibition by the metal chelator EDTA (Fig. S4B),  
270 CbiR homologs contain conserved His, Asp, and Glu residues that, in the characterized members  
271 of the superfamily, are involved in metal coordination (Fig. 6B). Furthermore, single mutations in  
272 many of these conserved residues in CbiR eliminated most or all of its AdoCbl hydrolysis activity  
273 when expressed in *E. coli* (Fig. 6C). These results demonstrate that CbiR shares both sequence and  
274 functional features common to the AP endonuclease 2 superfamily, and represents a new function  
275 within the superfamily.

276  
277 Finally, we investigated the prevalence of CbiR across sequenced organisms by examining  
278 genomes with *cbiR* homologs. The *cbiR* gene commonly occurs in the *Akkermansia* genus, as a  
279 search of the 191 available genomes in the NCBI database found that 184 have *cbiR*. Additionally,  
280 282 homologs of *A. muciniphila* CbiR with Expect values below  $10^{-3}$  were identified by BLAST  
281 in the genomes of 275 bacterial and 1 archaeal taxa from diverse habitats including aquatic  
282 environments, sewage, digesters, oil spills, bioreactors, soil, and human and animal hosts (Table  
283 S1). While 76% are found in the phyla Chlorobi, Chloroflexi, and Proteobacteria, CbiR homologs  
284 are also found in 19 other phyla including six candidate phyla and two candidate divisions (Fig.  
285 S3, Table S1), with relatively few in the PVC superphylum, to which *A. muciniphila* belongs.  
286 Similar to *A. muciniphila*, 80% of the *cbiR* homologs are located adjacent to genes involved in  
287 cobamide biosynthesis (Table S1), suggesting that they, too, function in cobamide remodeling. It  
288 is therefore likely that cobamide remodeling initiated by CbiR occurs in diverse bacteria and  
289 environments.

## 290 291 **Discussion**

292  
293 Cobamides are considered to be important modulators of mammalian gut ecosystems because they  
294 are involved in several metabolic pathways, their production is limited to a subset of prokaryotes,  
295 and their diverse structures are differentially accessible to different microbes (54, 78, 79). *A.*  
296 *muciniphila* has been shown to have positive effects on host metabolism, gut barrier function, and  
297 the inflammatory response (15-24), yet knowledge of its metabolic and ecological roles in the gut  
298 remains incomplete. Previous studies showed that *A. muciniphila* strain Muc<sup>T</sup> is unable to produce  
299 cobamides *de novo* (34), but can use pCbl produced by *E. hallii* or externally supplied Cbl for  
300 propionate production (26, 34). Here, while investigating the cobamide metabolism of *A.*  
301 *muciniphila* strain Muc<sup>T</sup>, we uncovered a novel cobamide remodeling activity and identified and  
302 characterized an enzyme capable of initiating this process, CbiR. This discovery adds new  
303 complexity to the understanding of the roles of *A. muciniphila* in the gut. Not only does *A.*  
304 *muciniphila* degrade mucin to provide nutrients to the gut microbiota (26, 27), but it is also capable  
305 of altering cobamide structure, potentially changing the cobamide composition of its environment.

306



307 As a member of the AP endonuclease 2 superfamily, CbiR likely contains a  $(\beta/\alpha)_8$  TIM barrel  
308 domain (63-77), unlike the structures predicted for the CbiZ and CobS protein families (80). Thus,  
309 not only does CbiR catalyze a unique reaction, but it is also distinct from the other cobamide  
310 remodeling enzymes in sequence and likely in structure. Intriguingly, while CbiR differs in  
311 sequence from B<sub>12</sub>-binding domains in cobamide-dependent enzymes, the substrate-binding  
312 domains of many cobamide-dependent enzymes are comprised of a  $(\beta/\alpha)_8$  TIM barrel structure,  
313 with the C-terminal face interacting with the cobamide cofactor (81-91). Given that CbiR is  
314 predicted to have a similar fold, it is possible that cobamide binding in CbiR and in these cobamide-  
315 dependent enzymes shares common features. The yet to be discovered enzyme responsible for  
316 remodeling in algae may also be unique, as neither a *P. lutheri* transcriptome (92) nor the *C.*  
317 *reinhardtii* genome contains homologs of CbiR or CbiZ. It therefore appears that cobamide  
318 remodeling mechanisms have independently evolved multiple times. Together with the multiple  
319 pathways that exist for cobamide biosynthesis, transport, and precursor salvaging (31, 33, 35, 93-  
320 99), the addition of CbiR to the growing list of enzymes involved in cobamide metabolism  
321 highlights the importance of cobamide physiology in the evolution of bacteria.

322  
323 CbiR has unexpectedly promiscuous activity, hydrolyzing cobamides irrespective of their lower  
324 ligand structure. This differs from *R. sphaeroides* CbiZ, which does not hydrolyze Cbl *in vitro*  
325 (59), and *V. cholerae* CobS, which remodels neither Cbl nor [Cre]Cba (48). In these cases, the  
326 cobamide remodeling pathway does not act on a cobamide(s) that can function in its organism's  
327 metabolism. In contrast, *A. muciniphila* CbiR readily hydrolyzes pCbl, which functions as a  
328 cofactor for methionine synthesis and propionate metabolism in *A. muciniphila* and is the product  
329 of Cbi salvaging and cobamide remodeling in the bacterium itself. Thus, it is unclear how *A.*  
330 *muciniphila* prevents CbiR from continuing to hydrolyze pCbl after it is formed via cobamide  
331 remodeling. It is possible that pCbl is sequestered intracellularly by binding to MetH or other  
332 cobamide-dependent enzymes. Alternatively, CbiR activity could be coupled to cobamide uptake,  
333 as has been suggested for CbiZ (59, 100). Indeed, similar to some *cbiZ* homologs, 25% of *cbiR*  
334 homologs are located adjacent to genes for putative transport proteins, including in *A. muciniphila*  
335 strain Muc<sup>T</sup> (Fig. S3). Remodeling in *D. mccartyi* strain 195 shows similar substrate promiscuity  
336 to *A. muciniphila* in the ability to act on numerous, structurally diverse cobamides (57), but the  
337 molecular basis of this promiscuity is unclear because its genome carries seven *cbiZ* homologs,  
338 none of which has been biochemically characterized. Aside from its activity on pCbl, the broad  
339 substrate range of CbiR may benefit *A. muciniphila* by enabling the bacterium to utilize a greater  
340 number of the cobamides present in its environment.

341  
342 The discovery that *A. muciniphila* remodels cobamides leads us to reexamine its ecological roles  
343 in the gut. CbiR is found in all of the 75 recently sequenced *A. muciniphila* strains from the human  
344 and mouse gut, including the 26 strains that contain the *de novo* cobamide biosynthesis pathway  
345 (34, 101). Thus, like cobamide-dependent metabolism (34), cobamide remodeling appears to be  
346 nearly universal in *A. muciniphila*. Further, the role of *A. muciniphila* in the gut may be flexible,  
347 ranging from producing cobamides *de novo* to remodeling cobamides produced by other microbes,  
348 depending on which strains inhabit an individual. Notably, the end product of cobamide  
349 remodeling in *A. muciniphila*, pCbl, was the third most abundant corrinoid detected in the human

350 gut in a study of human subjects residing at a single geographic location (42). Interestingly, that  
351 study also presented evidence that cobamide remodeling occurs in the human gut, as individuals  
352 supplemented with high levels of Cbl showed transiently increased levels of Cbi and the specific  
353 purinyl and phenolyl cobamides that were present in the gut prior to Cbl supplementation. It is  
354 possible that *A. muciniphila* is involved in this remodeling activity and contributes to the pool of  
355 pCbl in the gut. This, in turn, could modulate the growth or metabolism of other cobamide-  
356 requiring bacteria that rely on particular cobamides for their metabolic needs. CbiR may therefore  
357 not only expand access to the cobamides available to *A. muciniphila*, but also affect those  
358 accessible to other bacteria in the gut. Further, homologs of CbiR are found in at least 276 other  
359 microbial taxa and may function similarly in these microbes that inhabit diverse environments.  
360 The addition of CbiR to the cobamide remodeling enzymes that have been characterized to date –  
361 CbiZ, certain CobS homologs, and the enzyme(s) responsible for remodeling in algae – suggests  
362 that cobamide remodeling is more widespread than previously thought.

363

## 364 **Materials and Methods**

365

### 366 **Media and growth conditions**

367

368 *Akkermansia muciniphila* strain Muc<sup>T</sup> (DSM 22959, ATCC BAA-835) was cultivated at 37°C in  
369 a vinyl anaerobic chamber (Coy Laboratory Products Inc) under an atmosphere of approximately  
370 10% CO<sub>2</sub>, 3% H<sub>2</sub>, and 87% N<sub>2</sub>. A synthetic version of a basal mucin-based medium, in which  
371 mucin was replaced by soy peptone (16 g/L), L-threonine (4 g/L), glucose (2 g/L) and N-  
372 acetylglucosamine (2 g/L), was supplemented with 1% noble agar and used as a solid medium  
373 (21). This synthetic medium also contained L-methionine (125 mg/L) and omitted rumen fluid.  
374 M8 defined medium developed by Tramontano *et al.* (102) was used for liquid culturing. We found  
375 that the concentration of mucin in this medium (0.5%) was able to abrogate the requirement of  
376 methionine addition to the medium for *A. muciniphila* growth. Lowering the concentration to  
377 0.25% resulted in methionine-deplete conditions for *A. muciniphila* and supplementation with  
378 methionine or cobamides restored robust growth. This mucin concentration was used for the  
379 MetH-dependent growth assays. However, batch to batch variations were seen with mucin such  
380 that media that supported robust growth while remaining methionine-deplete could not always be  
381 achieved. Cobamides were omitted from all growth media except when specified. For MetH-  
382 dependent growth assays, methionine was omitted from M8 medium.

383

384 *Escherichia coli* was cultured at 37°C with aeration in LB medium for cloning, protein expression,  
385 and assessing CbiR hydrolytic activity. Ethanolamine-based growth experiments used medium  
386 from Scarlett and Turner (38), with B<sub>12</sub> omitted. Media were supplemented with antibiotics at the  
387 following concentrations when necessary: kanamycin, 25 mg/L (pETmini); ampicillin, 100 mg/L  
388 (pET-His<sub>6</sub>-MBP) and chloramphenicol, 20 mg/L (pLysS).

389

390 For all *in vivo* experiments involving corrinoids, culture media were supplemented with cyanylated  
391 cobamides or (CN)<sub>2</sub>Cbi, which are adenosylated following uptake into cells.

392

## 393 Genetic and molecular cloning techniques

394  
395 The entire *A. muciniphila cbiR* open reading frame, except the start codon, was cloned into a  
396 modified pET16b vector (103) with N-terminal His<sub>6</sub> and MBP tags added for protein purification.  
397 For analysis of CbiR activity in *E. coli*, a minimized 3 kb derivative of pET28a (pETmini)  
398 containing the Kan<sup>R</sup> marker, pBR322 origin, and *rop* gene was used. A constitutive promoter  
399 (BBa\_J23100, iGEM) and RBS (BBa\_B0034) were inserted into the vector for expression in *E.*  
400 *coli* MG1655-based strains (complete sequence:  
401 TTGACGGCTAGCTCAGTCCTAGGTACAGTGCTAGCGAATTCATACGACTCACTATAA  
402 AAGAGGAGAAA) and *A. muciniphila cbiR* was cloned downstream. Site-directed mutations  
403 were introduced into *cbiR* by PCR. All cloning was done by Gibson Assembly with *E. coli* XL1-  
404 Blue cells (104).

405  
406 Construction of the *E. coli* MG1655  $\Delta cobTSU \Delta cobC$  strain was accomplished using  $\lambda$  red-based  
407 recombination (105) and phage P1 transduction (106). An MG1655  $\Delta cobTSU::Kan^R$  operon  
408 deletion was constructed by  $\lambda$  red-based recombination. The  $\Delta cobC::Kan^R$  allele was transduced  
409 into MG1655 via P1 transduction from *E. coli* strain JW0633-1, which was obtained from the Keio  
410 collection (107). Kan<sup>R</sup> cassettes were removed by recombination of the flanking FRT sites as  
411 described (105).

## 412 413 Chemical reagents

414  
415 Porcine gastric mucin was purchased from MilliporeSigma (M1778). AdoCbl (coenzyme B<sub>12</sub>),  
416 MeCbl, CNCbl, and (CN)<sub>2</sub>Cbi were purchased from MilliporeSigma.

## 417 418 Cobamide synthesis, adenosylation, and quantification

419  
420 All other cyanylated cobamides used in the study were purified from bacterial cultures and  
421 cobamides were adenosylated and purified as previously described (50, 108). Cyanylated and  
422 adenosylated cobamides were quantified as previously described (50). MeCbl was quantified using  
423 an extinction coefficient of  $\epsilon_{519} = 8.7 \text{ mM}^{-1} \text{ cm}^{-1}$  (109). AdoCbi-P and MeCbi-P were quantified  
424 using the dicyanylated corrinoid extinction coefficient  $\epsilon_{580} = 10.1 \text{ mM}^{-1} \text{ cm}^{-1}$  following conversion  
425 to (CN)<sub>2</sub>Cbi-P by incubation with 10 mM KCN in the presence of light (110).

## 426 427 *A. muciniphila* MetH-dependent growth assay

428  
429 *A. muciniphila* was pre-cultured for 48 hours in M8 medium supplemented with 125 mg/L  
430 methionine. Cells were pelleted by centrifugation, washed twice with PBS, and diluted into 80  $\mu\text{L}$   
431 M8 medium to an OD<sub>600</sub> of 0.02 in a 384-well plate (Nunc) with varying concentrations of  
432 cobamides and Cbi. The wells were sealed (ThermalSeal RTS™, Excel Scientific) and the plate  
433 was incubated at 37°C in a BioTek Epoch 2 microplate reader. OD<sub>600</sub> was measured at regular  
434 intervals during growth.

435

### 436 ***E. coli* ethanolamine-dependent growth assay**

437  
438 *E. coli* was pre-cultured 16 h in ethanolamine medium supplemented with 0.02% ammonium  
439 chloride. Cells were pelleted by centrifugation, washed three times with 0.85% NaCl, and diluted  
440 to an OD<sub>600</sub> of 0.025 in 200 µL ethanolamine medium with the specified cobamide additions in a  
441 96-well plate (Corning). The wells were sealed (Breathe-Easy, Diversified Biotech) and OD<sub>600</sub>  
442 was monitored at 37°C in a BioTek Synergy 2 microplate reader with shaking.

443

### 444 **Protein expression and purification**

445

446 His<sub>6</sub>-MBP-CbiR was expressed in *E. coli* Rosetta(DE3) pLysS. Cells were grown to an OD<sub>600</sub> of  
447 0.4 at 37°C and expression was induced with 1 mM IPTG for 6 h at 30°C. Cells were lysed by  
448 sonication in 20 mM sodium phosphate, 300 mM NaCl, 10 mM imidazole, pH 7.4, with 0.5 mM  
449 PMSF, 1 µg/mL leupeptin, 1 µg/mL pepstatin, and 1 mg/mL lysozyme. The protein was purified  
450 from the clarified lysate using HisPur Ni-NTA resin (Thermo Scientific) and eluted with 250 mM  
451 imidazole. Purified protein was dialyzed into 25 mM Tris-HCl, pH 8.0, 300 mM NaCl, and 10%  
452 glycerol and stored at -80°C.

453

### 454 **His<sub>6</sub>-MBP-CbiR *in vitro* reactions**

455

456 Due to light sensitivity of the compounds, all work involving adenosylated cobamides or MeCbl  
457 was performed in the dark or under red or dim white light. Unless specified, the *in vitro* reactions  
458 were performed anaerobically at 37°C in a vinyl anaerobic chamber with an atmosphere as  
459 described above. The components of the reactions were 50 mM Tris buffer, 0.3 µM purified His<sub>6</sub>-  
460 MBP-CbiR, 1 mM DTT, and variable concentrations of a cobamide. To prepare the Tris buffer,  
461 Tris base was dissolved and equilibrated within the anaerobic chamber. Prior to each experiment,  
462 the pH was adjusted with NaOH to account for acidification by the CO<sub>2</sub> present in the atmosphere  
463 of the chamber. The pH was adjusted to 8.8-8.9 at room temperature (approximately 24°C),  
464 corresponding to a predicted pH of 8.45-8.55 at 37°C. Protein concentration was determined by  
465 absorbance at 280 nm (A<sub>280</sub>).

466

467 A BioTek Epoch 2 microplate reader and half-area UV-Star® 96-well microplates (Greiner Bio-  
468 One) were used for assays monitoring the reaction by absorbance. For these assays, separate 2X  
469 solutions of AdoCbl and His<sub>6</sub>-MBP-CbiR were prepared in 50 mM Tris buffer and 1 mM DTT. A  
470 frozen aliquot of His<sub>6</sub>-MBP-CbiR was thawed inside the anaerobic chamber prior to dilution. The  
471 2X AdoCbl solution was pre-incubated at 37°C for 60 min, while the 2X CbiR solution was pre-  
472 incubated at 37°C for 20 min. 60 µL each of 2X AdoCbl and 2X His<sub>6</sub>-MBP-CbiR were then mixed  
473 in a 96-well plate, with 100 µL transferred to a new well prior to measurements in the plate reader.  
474 Assays with MeCbl were prepared similarly.

475

476 Absorbances over time at 534 and 527 nm were used to monitor the conversion of AdoCbl to  
477 AdoCbi-P and MeCbl to MeCbi-P, respectively. To enable conversion of A<sub>534</sub> into moles of  
478 AdoCbl and A<sub>527</sub> into moles of MeCbl, the extinction coefficients of AdoCbl, MeCbl, and purified

479 AdoCbi-P and MeCbi-P were determined in 50 mM Tris buffer, pH 8.8, 1 mM DTT:  $\epsilon_{534}$  (AdoCbl)  
480 =  $7.8 \text{ mM}^{-1} \text{ cm}^{-1}$ ,  $\epsilon_{527}$  (MeCbl) =  $8.0 \text{ mM}^{-1} \text{ cm}^{-1}$ ,  $\epsilon_{534}$  (AdoCbi-P) =  $1.3 \text{ mM}^{-1} \text{ cm}^{-1}$ ,  $\epsilon_{527}$  (MeCbi-P)  
481 =  $2.7 \text{ mM}^{-1} \text{ cm}^{-1}$ .

482  
483 For reactions with adenosylated cobamides with different lower ligands monitored by HPLC,  
484 cobamides were mixed at 60  $\mu\text{M}$  with 50 mM Tris buffer and 1 mM DTT and equilibrated to 37°C.  
485 His<sub>6</sub>-MBP-CbiR was equilibrated to 37°C at 0.6  $\mu\text{M}$  in 50 mM Tris buffer and 1 mM DTT. Each  
486 cobamide and His<sub>6</sub>-MBP-CbiR were mixed in equal volume and incubated at 37°C. At three  
487 different timepoints, 100  $\mu\text{L}$  of the reaction mix was removed and mixed with 5  $\mu\text{L}$  of 600 mM  
488 EDTA to quench the reaction. The protein was removed from samples using Nanosep 10K  
489 centrifugal devices (Pall) prior to injection onto the HPLC. AdoCbi-P levels in the samples were  
490 quantified by HPLC by comparing to a standard curve generated with known quantities of purified  
491 AdoCbi-P. For reactions involving incubations of 4-18 h, initial equilibration at 37°C was not  
492 performed.

### 493 494 **Corrinoid extraction**

495  
496 Cbi salvaging and cobamide remodeling were assessed in *A. muciniphila* by cultivating in M8  
497 medium supplemented with 10 nM Cbi or cobamide, respectively, for 72 h. CbiR cobamide  
498 hydrolytic activity with different cobamides in *E. coli* was monitored using the MG1655  $\Delta\text{cobTSU}$   
499  $\Delta\text{cobC}$  strain cultivated in LB medium supplemented with 10 nM cobamide for 16 h. Cobamide  
500 remodeling in *E. coli* MG1655 was assessed by cultivating in ethanolamine medium supplemented  
501 with 100 nM [Cre]Cba and 1  $\mu\text{M}$  DMB for 94 h. CbiR mutants were analyzed in *E. coli* MG1655  
502  $\Delta\text{cobTSU}$   $\Delta\text{cobC}$  by culturing in LB medium supplemented with 75 nM Cbl for 20 h.

503  
504 Cyanation of corrinoids extracted from cells for Figures 2A, 2C, S1, and S2 was performed as  
505 previously described (57), with 5,000 corrinoid molar equivalents of KCN added. For extractions  
506 of adenosylated corrinoids (Figures 5A, 6C, S5, and S6), cell lysis was performed similarly, with  
507 KCN omitted; following removal of cellular debris by centrifugation, deionized water was added  
508 to the supernatant to decrease the methanol concentration to 10%. Solid phase extraction of  
509 cyanylated and adenosylated corrinoids with Sep-Pak C18 cartridges (Waters) was performed as  
510 described (37). Samples were dried, resuspended in 200  $\mu\text{L}$  deionized water (pH 7), and filtered  
511 with 0.45  $\mu\text{m}$  filters (Millex-HV, Millipore) or Nanosep 10K centrifugal devices prior to analysis  
512 by HPLC. For extractions involving adenosylated cobamides, all steps were performed in the dark  
513 or under red or dim white light.

### 514 515 **HPLC and MS analysis**

516  
517 Corrinoids were analyzed on an Agilent 1200 series HPLC equipped with a diode array detector.  
518 For experiments in Figures 2A, 2C, 3B, 4A, and 4B, an Agilent Zorbax SB-Aq column (5  $\mu\text{m}$ , 4.6  
519 x 150 mm) was used as previously described (method 2, (58)). For experiments in Figures 5A, 6C,  
520 and S6A, an Agilent Zorbax Eclipse Plus C18 column (5  $\mu\text{m}$ , 9.4 x 250 mm) was used with the  
521 following method: Solvent A, 0.1% formic acid in deionized water; Solvent B, 0.1% formic acid

522 in methanol; 2 mL/min at 30°C; 18% solvent B for 2.5 min followed by a linear gradient of 18 to  
523 60% solvent B over 28.5 min.

524  
525 An Agilent 1260 series fraction collector was used for HPLC purification of corrinoids and CbiR  
526 reaction products. The purification of CN-pCbl from *A. muciniphila* was performed using the  
527 Zorbax SB-Aq column with the method described above. Purification of AdoCbi-P and  $\alpha$ -ribazole  
528 from the hydrolysis of AdoCbl by His<sub>6</sub>-MBP-CbiR was performed in two steps. AdoCbi-P and  $\alpha$ -  
529 ribazole were first separated and collected on a Zorbax Eclipse XDB-C18 column (5  $\mu$ m, 4.6 x  
530 150 mm) using the following method: Solvent A, 10 mM ammonium acetate pH 6.5; Solvent B,  
531 100% methanol; 1 mL/min at 30°C; 0% B for 2 min followed by a linear gradient of 0 to 15%  
532 solvent B over 1.5 min, 15 to 35% over 6.5 min, 35 to 70% over 2 min, and 70 to 100% over 2  
533 min. Each compound was subsequently run and collected on the Zorbax SB-Aq column with the  
534 method described above. The purification of MeCbi-P from the *in vitro* hydrolysis of MeCbl was  
535 performed using the Zorbax SB-Aq column with the method above. The purification of  
536 adenosylated hydrolysis products of CbiR from *E. coli* was performed with two rounds of  
537 collection; AdoCbi-P and AdoCbi were first separated and collected on the Zorbax Eclipse Plus  
538 C18 column with the method above, and then each compound was run and collected on the Zorbax  
539 SB-Aq column using the method described. AdoCbl remodeled from [Cre]Cba in *E. coli* was  
540 purified using the Zorbax Eclipse Plus C18 column with the method described above. Collected  
541 compounds were de-salted with Sep-Pak C18 cartridges.

542  
543 MS analysis was performed on a Bruker Linear Iontrap Quadrupole coupled to a Fourier  
544 Transform Ion Cyclotron (LTQ-FT) mass spectrometer at the QB3/Chemistry MS Facility (UC  
545 Berkeley). Prior to MS analysis, the purified adenosylated and methylated corrinoids were exposed  
546 to light to remove the adenosyl and methyl upper ligands, respectively.

## 547 548 **Phylogenetic analysis**

549  
550 282 homologs of *A. muciniphila* strain Muc<sup>T</sup> CbiR were identified by BLAST with Expect values  
551 lower than 10<sup>-3</sup> (Table S1; sequences from other strains of *A. muciniphila* are excluded). A subset  
552 of 203 sequences with Expect values lower than 10<sup>-14</sup> and whose encoding genes were located  
553 adjacent to and in the same orientation as a cobamide biosynthesis gene(s) were chosen for  
554 phylogenetic analysis with the AP endonuclease 2 superfamily (pfam 01261) (Table S1).  
555 Sequences were clustered at 0.95 using CD-HIT to reduce the CbiR homolog sequence set by  
556 removing subspecies sequence diversity (111). This final set of 178 sequences and *A. muciniphila*  
557 CbiR were used to infer a phylogenetic tree with experimentally characterized members of the AP  
558 endonuclease 2 superfamily (Table S2). The sequences were aligned with MAFFT (112) and  
559 positions with 95% or greater gaps were removed by trimAl (113). A maximum likelihood tree  
560 presented in Figure 6A was inferred from this alignment using IQ-TREE v1.6.12 (114) with 1,500  
561 ultrafast bootstraps and visualized in iTOL (115).

## 562 563 **Acknowledgements**

564

565 We thank Amanda Shelton, Amrita Hazra, Kristopher Kennedy, Per Malkus, Raphael Valdivia,  
566 and Sebastian Gude for helpful discussions and Kristopher Kennedy and Sebastian Gude for  
567 critical reading of the manuscript. We are grateful to Kristopher Kennedy and Sebastian Gude for  
568 construction of the pETmini plasmid and *E. coli* MG1655  $\Delta cobTSU \Delta cobC$  strain, Nina Kirmiz  
569 and Gilberto Flores for reagents, and Rita Nichiporuk at the UC Berkeley QB3 Mass Spectrometry  
570 Facility for analysis of MS samples. This work was funded by National Institutes of Health Grant  
571 R01GM114535.

572

## 573 References

574

- 575 1. Cani PD, Van Hul M, Lefort C, Depommier C, Rastelli M, Everard A. 2019. Microbial  
576 regulation of organismal energy homeostasis. *Nat Metab* 1:34-46.
- 577 2. Cryan JF, O'Riordan KJ, Cowan CSM, Sandhu KV, Bastiaanssen TFS, Boehme M,  
578 Codagnone MG, Cussotto S, Fulling C, Golubeva AV, Guzzetta KE, Jaggar M, Long-  
579 Smith CM, Lyte JM, Martin JA, Molinero-Perez A, Moloney G, Morelli E, Morillas E,  
580 O'Connor R, Cruz-Pereira JS, Peterson VL, Rea K, Ritz NL, Sherwin E, Spichak S,  
581 Teichman EM, van de Wouw M, Ventura-Silva AP, Wallace-Fitzsimons SE, Hyland N,  
582 Clarke G, Dinan TG. 2019. The Microbiota-Gut-Brain Axis. *Physiol Rev* 99:1877-2013.
- 583 3. Hooper LV, Littman DR, Macpherson AJ. 2012. Interactions between the microbiota and  
584 the immune system. *Science* 336:1268-73.
- 585 4. Libertucci J, Young VB. 2019. The role of the microbiota in infectious diseases. *Nat*  
586 *Microbiol* 4:35-45.
- 587 5. Clemente JC, Ursell LK, Parfrey LW, Knight R. 2012. The impact of the gut microbiota  
588 on human health: an integrative view. *Cell* 148:1258-70.
- 589 6. Dinan TG, Cryan JF. 2017. The Microbiome-Gut-Brain Axis in Health and Disease.  
590 *Gastroenterol Clin North Am* 46:77-89.
- 591 7. Durack J, Lynch SV. 2019. The gut microbiome: Relationships with disease and  
592 opportunities for therapy. *J Exp Med* 216:20-40.
- 593 8. Honda K, Littman DR. 2016. The microbiota in adaptive immune homeostasis and disease.  
594 *Nature* 535:75-84.
- 595 9. Kho ZY, Lal SK. 2018. The Human Gut Microbiome - A Potential Controller of Wellness  
596 and Disease. *Front Microbiol* 9:1835.
- 597 10. Miquel S, Martín R, Rossi O, Bermúdez-Humarán LG, Chatel JM, Sokol H, Thomas M,  
598 Wells JM, Langella P. 2013. *Faecalibacterium prausnitzii* and human intestinal health.  
599 *Curr Opin Microbiol* 16:255-61.
- 600 11. O'Callaghan A, van Sinderen D. 2016. Bifidobacteria and Their Role as Members of the  
601 Human Gut Microbiota. *Front Microbiol* 7:925.
- 602 12. Sokol H, Pigneur B, Watterlot L, Lakhdari O, Bermúdez-Humarán LG, Gratadoux JJ,  
603 Blugeon S, Bridonneau C, Furet JP, Corthier G, Grangette C, Vasquez N, Pochart P,  
604 Trugnan G, Thomas G, Blottière HM, Doré J, Marteau P, Seksik P, Langella P. 2008.  
605 *Faecalibacterium prausnitzii* is an anti-inflammatory commensal bacterium identified by  
606 gut microbiota analysis of Crohn disease patients. *Proc Natl Acad Sci U S A* 105:16731-6.
- 607 13. Derrien M, Belzer C, de Vos WM. 2017. *Akkermansia muciniphila* and its role in  
608 regulating host functions. *Microb Pathog* 106:171-181.
- 609 14. Zhai Q, Feng S, Arjan N, Chen W. 2019. A next generation probiotic, *Akkermansia*  
610 *muciniphila*. *Crit Rev Food Sci Nutr* 59:3227-3236.

- 611 15. Alam A, Leoni G, Quiros M, Wu H, Desai C, Nishio H, Jones RM, Nusrat A, Neish AS.  
612 2016. The microenvironment of injured murine gut elicits a local pro-restitutive  
613 microbiota. *Nat Microbiol* 1:15021.
- 614 16. Derrien M, Van Baarlen P, Hooiveld G, Norin E, Müller M, de Vos WM. 2011. Modulation  
615 of Mucosal Immune Response, Tolerance, and Proliferation in Mice Colonized by the  
616 Mucin-Degrader *Akkermansia muciniphila*. *Front Microbiol* 2:166.
- 617 17. Everard A, Belzer C, Geurts L, Ouwerkerk JP, Druart C, Bindels LB, Guiot Y, Derrien M,  
618 Muccioli GG, Delzenne NM, de Vos WM, Cani PD. 2013. Cross-talk between  
619 *Akkermansia muciniphila* and intestinal epithelium controls diet-induced obesity. *Proc Natl*  
620 *Acad Sci U S A* 110:9066-71.
- 621 18. Grander C, Adolph TE, Wieser V, Lowe P, Wrzosek L, Gyongyosi B, Ward DV, Grabherr  
622 F, Gerner RR, Pfister A, Enrich B, Ciocan D, Macheiner S, Mayr L, Drach M, Moser P,  
623 Moschen AR, Perlemuter G, Szabo G, Cassard AM, Tilg H. 2018. Recovery of ethanol-  
624 induced *Akkermansia muciniphila* depletion ameliorates alcoholic liver disease. *Gut*  
625 67:891-901.
- 626 19. Li J, Lin S, Vanhoutte PM, Woo CW, Xu A. 2016. *Akkermansia Muciniphila* Protects  
627 Against Atherosclerosis by Preventing Metabolic Endotoxemia-Induced Inflammation in  
628 *Apoe*<sup>-/-</sup> Mice. *Circulation* 133:2434-46.
- 629 20. Ottman N, Reunanen J, Meijerink M, Pietilä TE, Kainulainen V, Klievink J, Huuskonen L,  
630 Aalvink S, Skurnik M, Boeren S, Satokari R, Mercenier A, Palva A, Smidt H, de Vos WM,  
631 Belzer C. 2017. Pili-like proteins of *Akkermansia muciniphila* modulate host immune  
632 responses and gut barrier function. *PLoS One* 12:e0173004.
- 633 21. Plovier H, Everard A, Druart C, Depommier C, Van Hul M, Geurts L, Chilloux J, Ottman  
634 N, Duparc T, Lichtenstein L, Myridakis A, Delzenne NM, Klievink J, Bhattacharjee A,  
635 van der Ark KC, Aalvink S, Martinez LO, Dumas ME, Maiter D, Loumaye A, Hermans  
636 MP, Thissen JP, Belzer C, de Vos WM, Cani PD. 2017. A purified membrane protein from  
637 *Akkermansia muciniphila* or the pasteurized bacterium improves metabolism in obese and  
638 diabetic mice. *Nat Med* 23:107-113.
- 639 22. Reunanen J, Kainulainen V, Huuskonen L, Ottman N, Belzer C, Huhtinen H, de Vos WM,  
640 Satokari R. 2015. *Akkermansia muciniphila* Adheres to Enterocytes and Strengthens the  
641 Integrity of the Epithelial Cell Layer. *Appl Environ Microbiol* 81:3655-62.
- 642 23. Shin NR, Lee JC, Lee HY, Kim MS, Whon TW, Lee MS, Bae JW. 2014. An increase in  
643 the *Akkermansia* spp. population induced by metformin treatment improves glucose  
644 homeostasis in diet-induced obese mice. *Gut* 63:727-35.
- 645 24. Wu W, Lv L, Shi D, Ye J, Fang D, Guo F, Li Y, He X, Li L. 2017. Protective Effect of  
646 *Akkermansia muciniphila* against Immune-Mediated Liver Injury in a Mouse Model. *Front*  
647 *Microbiol* 8:1804.
- 648 25. Derrien M, Vaughan EE, Plugge CM, de Vos WM. 2004. *Akkermansia muciniphila* gen.  
649 nov., sp. nov., a human intestinal mucin-degrading bacterium. *Int J Syst Evol Microbiol*  
650 54:1469-1476.
- 651 26. Belzer C, Chia LW, Aalvink S, Chamlagain B, Piironen V, Knol J, de Vos WM. 2017.  
652 Microbial Metabolic Networks at the Mucus Layer Lead to Diet-Independent Butyrate and  
653 Vitamin B<sub>12</sub> Production by Intestinal Symbionts. *mBio* 8:e00770-17.
- 654 27. Chia LW, Hornung BVH, Aalvink S, Schaap PJ, de Vos WM, Knol J, Belzer C. 2018.  
655 Deciphering the trophic interaction between *Akkermansia muciniphila* and the butyrogenic



- 656 gut commensal *Anaerostipes caccae* using a metatranscriptomic approach. *Antonie Van*  
657 *Leeuwenhoek* 111:859-873.
- 658 28. Corrêa-Oliveira R, Fachi JL, Vieira A, Sato FT, Vinolo MA. 2016. Regulation of immune  
659 cell function by short-chain fatty acids. *Clin Transl Immunology* 5:e73.
- 660 29. Koh A, De Vadder F, Kovatcheva-Datchary P, Bäckhed F. 2016. From Dietary Fiber to  
661 Host Physiology: Short-Chain Fatty Acids as Key Bacterial Metabolites. *Cell* 165:1332-  
662 1345.
- 663 30. Louis P, Flint HJ. 2017. Formation of propionate and butyrate by the human colonic  
664 microbiota. *Environ Microbiol* 19:29-41.
- 665 31. Roth JR, Lawrence JG, Bobik TA. 1996. Cobalamin (coenzyme B<sub>12</sub>): Synthesis and  
666 biological significance. *Annual Review of Microbiology* 50:137-181.
- 667 32. Banerjee R, Ragsdale SW. 2003. The many faces of vitamin B<sub>12</sub>: catalysis by cobalamin-  
668 dependent enzymes. *Annu Rev Biochem* 72:209-47.
- 669 33. Shelton AN, Seth EC, Mok KC, Han AW, Jackson SN, Haft DR, Taga ME. 2019. Uneven  
670 distribution of cobamide biosynthesis and dependence in bacteria predicted by comparative  
671 genomics. *ISME J* 13:789-804.
- 672 34. Kirmiz N, Galindo K, Cross KL, Luna E, Rhoades N, Podar M, Flores GE. 2020.  
673 Comparative Genomics Guides Elucidation of Vitamin B<sub>12</sub> Biosynthesis in Novel Human-  
674 Associated *Akkermansia* Strains. *Appl Environ Microbiol* 86:e02117–e02119.
- 675 35. Escalante-Semerena JC. 2007. Conversion of cobinamide into adenosylcobamide in  
676 bacteria and archaea. *J Bacteriol* 189:4555-60.
- 677 36. Baker KA, Perego M. 2011. Transcription antitermination by a phosphorylated response  
678 regulator and cobalamin-dependent termination at a B<sub>12</sub> riboswitch contribute to  
679 ethanolamine utilization in *Enterococcus faecalis*. *J Bacteriol* 193:2575-86.
- 680 37. Degan PH, Barry NA, Mok KC, Taga ME, Goodman AL. 2014. Human gut microbes use  
681 multiple transporters to distinguish vitamin B<sub>12</sub> analogs and compete in the gut. *Cell Host*  
682 *Microbe* 15:47-57.
- 683 38. Scarlett FA, Turner JM. 1976. Microbial metabolism of amino alcohols. Ethanolamine  
684 catabolism mediated by coenzyme B<sub>12</sub>-dependent ethanolamine ammonia-lyase in  
685 *Escherichia coli* and *Klebsiella aerogenes*. *J Gen Microbiol* 95:173-6.
- 686 39. Shelton AN, Lyu X, Taga ME. 2020. Flexible Cobamide Metabolism in *Clostridioides*  
687 (*Clostridium*) *difficile* 630 *Derm*. *J Bacteriol* 202:e00584-19.
- 688 40. Varel VH, Bryant MP. 1974. Nutritional features of *Bacteroides fragilis* subsp. *fragilis*.  
689 *Appl Microbiol* 28:251-7.
- 690 41. Renz P. 1999. Biosynthesis of the 5,6-dimethylbenzimidazole moiety of cobalamin and of  
691 the other bases found in natural corrinoids, p 557-566. In Banerjee R (ed), *Chemistry and*  
692 *Biochemistry of B12*. John Wiley & Sons, Inc., New York.
- 693 42. Allen RH, Stabler SP. 2008. Identification and quantitation of cobalamin and cobalamin  
694 analogues in human feces. *American Journal of Clinical Nutrition* 87:1324-1335.
- 695 43. Girard CL, Berthiaume R, Stabler SP, Allen RH. 2009. Identification of cobalamin and  
696 cobalamin analogues along the gastrointestinal tract of dairy cows. *Arch Anim Nutr*  
697 63:379-88.
- 698 44. Girard CL, Santschi DE, Stabler SP, Allen RH. 2009. Apparent ruminal synthesis and  
699 intestinal disappearance of vitamin B<sub>12</sub> and its analogs in dairy cows. *J Dairy Sci* 92:4524-  
700 9.

- 701 45. Men Y, Seth EC, Yi S, Crofts TS, Allen RH, Taga ME, Alvarez-Cohen L. 2015.  
702 Identification of specific corrinoids reveals corrinoid modification in dechlorinating  
703 microbial communities. *Environ Microbiol* 17:4873-84.
- 704 46. Keller S, Kunze C, Bommer M, Paetz C, Menezes RC, Svatoš A, Dobbek H, Schubert T.  
705 2018. Selective utilization of benzimidazolyl-norcobamides as cofactors by the  
706 tetrachloroethene reductive dehalogenase of *Sulfurospirillum multivorans*. *J Bacteriol*  
707 200:e00584-17.
- 708 47. Ma AT, Beld J, Brahamsha B. 2017. An Amoebal Grazer of Cyanobacteria Requires  
709 Cobalamin Produced by Heterotrophic Bacteria. *Appl Environ Microbiol* 83:e00035-  
710 00017.
- 711 48. Ma AT, Tyrell B, Beld J. 2020. Specificity of cobamide remodeling, uptake and utilization  
712 in *Vibrio cholerae*. *Mol Microbiol* 113:89-102.
- 713 49. Schubert T, von Reuss SH, Kunze C, Paetz C, Kruse S, Brand-Schon P, Nelly AM, Nuske  
714 J, Diekert G. 2019. Guided cobamide biosynthesis for heterologous production of reductive  
715 dehalogenases. *Microb Biotechnol* 12:346-359.
- 716 50. Sokolovskaya OM, Mok KC, Park JD, Tran JLA, Quanstrom KA, Taga ME. 2019.  
717 Cofactor Selectivity in Methylmalonyl Coenzyme A Mutase, a Model Cobamide-  
718 Dependent Enzyme. *mBio* 10:e01303-19.
- 719 51. Tanioka Y, Miyamoto E, Yabuta Y, Ohnishi K, Fujita T, Yamaji R, Misono H, Shigeoka  
720 S, Nakano Y, Inui H, Watanabe F. 2010. Methyladeninylcobamide functions as the  
721 cofactor of methionine synthase in a Cyanobacterium, *Spirulina platensis* NIES-39. *FEBS*  
722 *Lett* 584:3223-6.
- 723 52. Watanabe F, Nakano Y, Stupperich E. 1992. Different corrinoid specificities for cell  
724 growth and cobalamin uptake in *Euglena gracilis* Z. *J Gen Microbiol* 138:1807-1813.
- 725 53. Yan J, Bi M, Bourdon AK, Farmer AT, Wang PH, Molenda O, Quaile AT, Jiang N, Yang  
726 Y, Yin Y, Şimşir B, Campagna SR, Edwards EA, Löffler FE. 2018. Purinyl-cobamide is a  
727 native prosthetic group of reductive dehalogenases. *Nat Chem Biol* 14:8-14.
- 728 54. Sokolovskaya OM, Shelton AN, Taga ME. 2020. Sharing vitamins: Cobamides unveil  
729 microbial interactions. *Science* 369:eaba0165.
- 730 55. Helliwell KE, Lawrence AD, Holzer A, Kudahl UJ, Sasso S, Kräutler B, Scanlan DJ,  
731 Warren MJ, Smith AG. 2016. Cyanobacteria and Eukaryotic Algae Use Different Chemical  
732 Variants of Vitamin B<sub>12</sub>. *Curr Biol* 26:999-1008.
- 733 56. Yan J, Şimşir B, Farmer AT, Bi M, Yang Y, Campagna SR, Löffler FE. 2016. The corrinoid  
734 cofactor of reductive dehalogenases affects dechlorination rates and extents in  
735 organohalide-respiring *Dehalococcoides mccartyi*. *ISME J* 10:1092-101.
- 736 57. Yi S, Seth EC, Men YJ, Stabler SP, Allen RH, Alvarez-Cohen L, Taga ME. 2012.  
737 Versatility in corrinoid salvaging and remodeling pathways supports corrinoid-dependent  
738 metabolism in *Dehalococcoides mccartyi*. *Appl Environ Microbiol* 78:7745-52.
- 739 58. Mok KC, Taga ME. 2013. Growth inhibition of *Sporomusa ovata* by incorporation of  
740 benzimidazole bases into cobamides. *J Bacteriol* 195:1902-11.
- 741 59. Gray MJ, Escalante-Semerena JC. 2009. The cobinamide amidohydrolase (cobyrinic acid-  
742 forming) CbiZ enzyme: a critical activity of the cobamide remodelling system of  
743 *Rhodobacter sphaeroides*. *Mol Microbiol* 74:1198-210.
- 744 60. Daley JM, Zakaria C, Ramotar D. 2010. The endonuclease IV family of  
745 apurinic/apyrimidinic endonucleases. *Mutat Res* 705:217-27.

- 746 61. Lawrence JG, Roth JR. 1995. The cobalamin (coenzyme B<sub>12</sub>) biosynthetic genes of  
747 *Escherichia coli*. J Bacteriol 177:6371-80.
- 748 62. Poppe L, Bothe H, Bröker G, Buckel W, Stupperich E, Rétey J. 2000. Elucidation of the  
749 coenzyme binding mode of further B<sub>12</sub>-dependent enzymes using a base-off analogue of  
750 coenzyme B<sub>12</sub>. J Mol Catal 10:345-350.
- 751 63. Asano R, Ishikawa H, Nakane S, Nakagawa N, Kuramitsu S, Masui R. 2011. An additional  
752 C-terminal loop in endonuclease IV, an apurinic/aprimidinic endonuclease, controls  
753 binding affinity to DNA. Acta Crystallogr D Biol Crystallogr 67:149-55.
- 754 64. Chan HC, Zhu Y, Hu Y, Ko TP, Huang CH, Ren F, Chen CC, Ma Y, Guo RT, Sun Y.  
755 2012. Crystal structures of D-psicose 3-epimerase from *Clostridium cellulolyticum* H10  
756 and its complex with ketohexose sugars. Protein Cell 3:123-31.
- 757 65. Collyer CA, Henrick K, Blow DM. 1990. Mechanism for aldose-ketose interconversion by  
758 D-xylose isomerase involving ring opening followed by a 1,2-hydride shift. J Mol Biol  
759 212:211-35.
- 760 66. Hosfield DJ, Guan Y, Haas BJ, Cunningham RP, Tainer JA. 1999. Structure of the DNA  
761 repair enzyme endonuclease IV and its DNA complex: double-nucleotide flipping at abasic  
762 sites and three-metal-ion catalysis. Cell 98:397-408.
- 763 67. Jenkins J, Janin J, Rey F, Chiadmi M, van Tilbeurgh H, Lasters I, De Maeyer M, Van Belle  
764 D, Wodak SJ, Lauwereys M, et al. 1992. Protein engineering of xylose (glucose) isomerase  
765 from *Actinoplanes missouriensis*. 1. Crystallography and site-directed mutagenesis of  
766 metal binding sites. Biochemistry 31:5449-58.
- 767 68. Kim K, Kim HJ, Oh DK, Cha SS, Rhee S. 2006. Crystal structure of D-psicose 3-epimerase  
768 from *Agrobacterium tumefaciens* and its complex with true substrate D-fructose: a pivotal  
769 role of metal in catalysis, an active site for the non-phosphorylated substrate, and its  
770 conformational changes. J Mol Biol 361:920-31.
- 771 69. Lavie A, Allen KN, Petsko GA, Ringe D. 1994. X-ray Crystallographic Structures of D-  
772 Xylose Isomerase-Substrate Complexes Position the Substrate and Provide Evidence for  
773 Metal Movement during Catalysis. Biochemistry 33:5469-5480.
- 774 70. Shi R, Pineda M, Ajamian E, Cui Q, Matte A, Cygler M. 2008. Structure of L-xylulose-5-  
775 Phosphate 3-epimerase (UlaE) from the anaerobic L-ascorbate utilization pathway of  
776 *Escherichia coli*: identification of a novel phosphate binding motif within a TIM barrel  
777 fold. J Bacteriol 190:8137-44.
- 778 71. Tomanicek SJ, Hughes RC, Ng JD, Coates L. 2010. Structure of the endonuclease IV  
779 homologue from *Thermotoga maritima* in the presence of active-site divalent metal ions.  
780 Acta Crystallogr Sect F Struct Biol Cryst Commun 66:1003-12.
- 781 72. Uechi K, Sakuraba H, Yoshihara A, Morimoto K, Takata G. 2013. Structural insight into  
782 L-ribulose 3-epimerase from *Mesorhizobium loti*. Acta Crystallogr D Biol Crystallogr  
783 69:2330-9.
- 784 73. Whitlow M, Howard AJ, Finzel BC, Poulos TL, Winborne E, Gilliland GL. 1991. A metal-  
785 mediated hydride shift mechanism for xylose isomerase based on the 1.6 Å *Streptomyces*  
786 *rubiginosus* structures with xylitol and D-xylose. Proteins 9:153-73.
- 787 74. Yoshida H, Yamada M, Nishitani T, Takada G, Izumori K, Kamitori S. 2007. Crystal  
788 structures of D-tagatose 3-epimerase from *Pseudomonas cichorii* and its complexes with  
789 D-tagatose and D-fructose. J Mol Biol 374:443-53.
- 790 75. Yoshida H, Yoshihara A, Gullapalli PK, Ohtani K, Akimitsu K, Izumori K, Kamitori S.  
791 2018. X-ray structure of *Arthrobacter globiformis* M30 ketose 3-epimerase for the

- 792 production of D-allulose from D-fructose. *Acta Crystallogr F Struct Biol Commun* 74:669-  
793 676.
- 794 76. Zhang RG, Dementieva I, Duke N, Collart F, Quait-Randall E, Alkire R, Dieckman L,  
795 Maltsev N, Korolev O, Joachimiak A. 2002. Crystal structure of *Bacillus subtilis* IolII shows  
796 endonuclease IV fold with altered Zn binding. *Proteins* 48:423-6.
- 797 77. Zhang W, Xu Y, Yan M, Li S, Wang H, Yang H, Zhou W, Rao Z. 2018. Crystal structure  
798 of the apurinic/apyrimidinic endonuclease IV from *Mycobacterium tuberculosis*. *Biochem*  
799 *Biophys Res Commun* 498:111-118.
- 800 78. Degnan PH, Taga ME, Goodman AL. 2014. Vitamin B<sub>12</sub> as a modulator of gut microbial  
801 ecology. *Cell Metab* 20:769-778.
- 802 79. Rowley CA, Kendall MM. 2019. To B<sub>12</sub> or not to B<sub>12</sub>: Five questions on the role of  
803 cobalamin in host-microbial interactions. *PLoS Pathog* 15:e1007479.
- 804 80. Ovchinnikov S, Park H, Varghese N, Huang PS, Pavlopoulos GA, Kim DE, Kamisetty H,  
805 Kyrpides NC, Baker D. 2017. Protein structure determination using metagenome sequence  
806 data. *Science* 355:294-298.
- 807 81. Berkovitch F, Behshad E, Tang KH, Enns EA, Frey PA, Drennan CL. 2004. A locking  
808 mechanism preventing radical damage in the absence of substrate, as revealed by the x-ray  
809 structure of lysine 5,6-aminomutase. *Proc Natl Acad Sci U S A* 101:15870-5.
- 810 82. Doukov T, Seravalli J, Stezowski JJ, Ragsdale SW. 2000. Crystal structure of a  
811 methyltetrahydrofolate- and corrinoid-dependent methyltransferase. *Structure* 8:817-30.
- 812 83. Evans JC, Huddler DP, Hilgers MT, Romanchuk G, Matthews RG, Ludwig ML. 2004.  
813 Structures of the N-terminal modules imply large domain motions during catalysis by  
814 methionine synthase. *Proc Natl Acad Sci U S A* 101:3729-36.
- 815 84. Hagemeyer CH, Krer M, Thauer RK, Warkentin E, Ermler U. 2006. Insight into the  
816 mechanism of biological methanol activation based on the crystal structure of the  
817 methanol-cobalamin methyltransferase complex. *Proc Natl Acad Sci U S A* 103:18917-22.
- 818 85. Mancina F, Keep NH, Nakagawa A, Leadlay PF, McSweeney S, Rasmussen B, Bösecke,  
819 P., Diat O, Evans PR. 1996. How coenzyme B<sub>12</sub> radicals are generated: the crystal structure  
820 of methylmalonyl-coenzyme A mutase at 2 Å resolution. *Structure* 4:339-50.
- 821 86. Reitzer R, Gruber K, Jogl G, Wagner UG, Bothe H, Buckel W, Kratky C. 1999. Glutamate  
822 mutase from *Clostridium cochlearium*: the structure of a coenzyme B<sub>12</sub>-dependent enzyme  
823 provides new mechanistic insights. *Structure* 7:891-902.
- 824 87. Shibata N, Masuda J, Tobimatsu T, Toraya T, Suto K, Morimoto Y, Yasuoka N. 1999. A  
825 new mode of B<sub>12</sub> binding and the direct participation of a potassium ion in enzyme  
826 catalysis: X-ray structure of diol dehydratase. *Structure* 7:997-1008.
- 827 88. Shibata N, Tamagaki H, Hieda N, Akita K, Komori H, Shomura Y, Terawaki S, Mori K,  
828 Yasuoka N, Higuchi Y, Toraya T. 2010. Crystal structures of ethanolamine ammonia-lyase  
829 complexed with coenzyme B<sub>12</sub> analogs and substrates. *J Biol Chem* 285:26484-93.
- 830 89. Svetlitchnaia T, Svetlitchnyi V, Meyer O, Dobbek H. 2006. Structural insights into  
831 methyltransfer reactions of a corrinoid iron-sulfur protein involved in acetyl-CoA  
832 synthesis. *Proc Natl Acad Sci U S A* 103:14331-6.
- 833 90. Wolthers KR, Levy C, Scrutton NS, Leys D. 2010. Large-scale domain dynamics and  
834 adenosylcobalamin reorientation orchestrate radical catalysis in ornithine 4,5-  
835 aminomutase. *J Biol Chem* 285:13942-50.
- 836 91. Yamanishi M, Yunoki M, Tobimatsu T, Sato H, Matsui J, Dokiya A, Iuchi Y, Oe K, Suto  
837 K, Shibata N, Morimoto Y, Yasuoka N, Toraya T. 2002. The crystal structure of coenzyme

- 838 B<sub>12</sub>-dependent glycerol dehydratase in complex with cobalamin and propane-1,2-diol. *Eur*  
839 *J Biochem* 269:4484-94.
- 840 92. Keeling PJ, Burki F, Wilcox HM, Allam B, Allen EE, Amaral-Zettler LA, Armbrust EV,  
841 Archibald JM, Bharti AK, Bell CJ, Beszteri B, Bidle KD, Cameron CT, Campbell L, Caron  
842 DA, Cattolico RA, Collier JL, Coyne K, Davy SK, Deschamps P, Dyhrman ST, Edvardsen  
843 B, Gates RD, Gobler CJ, Greenwood SJ, Guida SM, Jacobi JL, Jakobsen KS, James ER,  
844 Jenkins B, John U, Johnson MD, Juhl AR, Kamp A, Katz LA, Kiene R, Kudryavtsev A,  
845 Leander BS, Lin S, Lovejoy C, Lynn D, Marchetti A, McManus G, Nedelcu AM, Menden-  
846 Deuer S, Miceli C, Mock T, Montresor M, Moran MA, Murray S, et al. 2014. The Marine  
847 Microbial Eukaryote Transcriptome Sequencing Project (MMETSP): Illuminating the  
848 Functional Diversity of Eukaryotic Life in the Oceans through Transcriptome Sequencing.  
849 *PLoS Biol* 12:e1001889.
- 850 93. Campbell GR, Taga ME, Mistry K, Lloret J, Anderson PJ, Roth JR, Walker GC. 2006.  
851 *Sinorhizobium meliloti bluB* is necessary for production of 5,6-dimethylbenzimidazole, the  
852 lower ligand of B<sub>12</sub>. *Proc Natl Acad Sci U S A* 103:4634-9.
- 853 94. Gopinath K, Venclovas C, Ioerger TR, Sacchettini JC, McKinney JD, Mizrahi V, Warner  
854 DF. 2013. A vitamin B<sub>12</sub> transporter in *Mycobacterium tuberculosis*. *Open Biol* 3:120175.
- 855 95. Gray MJ, Escalante-Semerena JC. 2010. A new pathway for the synthesis of a-ribose-  
856 phosphate in *Listeria innocua*. *Mol Microbiol* 77:1429-38.
- 857 96. Hazra AB, Han AW, Mehta AP, Mok KC, Osadchiy V, Begley TP, Taga ME. 2015.  
858 Anaerobic biosynthesis of the lower ligand of vitamin B<sub>12</sub>. *Proc Natl Acad Sci U S A*  
859 112:10792-7.
- 860 97. Rempel S, Gati C, Nijland M, Thangaratnarajah C, Karyolaimos A, de Gier JW, Guskov  
861 A, Slotboom DJ. 2020. A mycobacterial ABC transporter mediates the uptake of  
862 hydrophilic compounds. *Nature* 580:409-412.
- 863 98. Santos JA, Rempel S, Mous ST, Pereira CT, Ter Beek J, de Gier JW, Guskov A, Slotboom  
864 DJ. 2018. Functional and structural characterization of an ECF-type ABC transporter for  
865 vitamin B<sub>12</sub>. *Elife* 7:e35828.
- 866 99. Wexler AG, Schofield WB, Degnan PH, Folta-Stogniew E, Barry NA, Goodman AL. 2018.  
867 Human gut *Bacteroides* capture vitamin B<sub>12</sub> via cell surface-exposed lipoproteins. *Elife*  
868 7:e37138.
- 869 100. Gray MJ, Tavares NK, Escalante-Semerena JC. 2008. The genome of *Rhodobacter*  
870 *sphaeroides* strain 2.4.1 encodes functional cobinamide salvaging systems of archaeal and  
871 bacterial origins. *Mol Microbiol* 70:824-36.
- 872 101. Guo X, Li S, Zhang J, Wu F, Li X, Wu D, Zhang M, Ou Z, Jie Z, Yan Q, Li P, Yi J, Peng  
873 Y. 2017. Genome sequencing of 39 *Akkermansia muciniphila* isolates reveals its  
874 population structure, genomic and functional diversity, and global distribution in  
875 mammalian gut microbiotas. *BMC Genomics* 18:800.
- 876 102. Tramontano M, Andrejev S, Pruteanu M, Klünemann M, Kuhn M, Galardini M, Jouhten  
877 P, Zelezniak A, Zeller G, Bork P, Typas A, Patil KR. 2018. Nutritional preferences of  
878 human gut bacteria reveal their metabolic idiosyncrasies. *Nat Microbiol* 3:514-522.
- 879 103. Kranzusch PJ, Lee ASY, Wilson SC, Solovykh MS, Vance RE, Berger JM, Doudna JA.  
880 2014. Structure-guided reprogramming of human cGAS dinucleotide linkage specificity.  
881 *Cell* 158:1011-1021.

- 882 104. Gibson DG, Young L, Chuang RY, Venter JC, Hutchison CA, 3rd, Smith HO. 2009.  
883 Enzymatic assembly of DNA molecules up to several hundred kilobases. *Nat Methods*  
884 6:343-5.
- 885 105. Datsenko KA, Wanner BL. 2000. One-step inactivation of chromosomal genes in  
886 *Escherichia coli* K-12 using PCR products. *Proc Natl Acad Sci U S A* 97:6640-5.
- 887 106. Silhavy TJ, Berman ML, Enquist LW. 1984. Experiments with Gene Fusions. Cold Spring  
888 Harbor Laboratory Press, Cold Spring Harbor, NY).
- 889 107. Baba T, Ara T, Hasegawa M, Takai Y, Okumura Y, Baba M, Datsenko KA, Tomita M,  
890 Wanner BL, Mori H. 2006. Construction of *Escherichia coli* K-12 in-frame, single-gene  
891 knockout mutants: the Keio collection. *Mol Syst Biol* 2:2006 0008.
- 892 108. Crofts TS, Hazra AB, Tran JL, Sokolovskaya OM, Osadchiy V, Ad O, Pelton J, Bauer S,  
893 Taga ME. 2014. Regiospecific formation of cobamide isomers is directed by CobT.  
894 *Biochemistry* 53:7805-15.
- 895 109. Hogenkamp HPC. 1975. The chemistry of cobalamins and related compounds, p 55. *In*  
896 Babior BM (ed), *Cobalamin Biochemistry and Pathophysiology*. John Wiley and Sons, Inc.
- 897 110. Stupperich E, Eisinger HJ, Kräutler B. 1988. Diversity of corrinoids in acetogenic bacteria.  
898 *p*-cresolylcobamide from *Sporomusa ovata*, 5-methoxy-6-methylbenzimidazolylcobamide  
899 from *Clostridium formicoaceticum* and vitamin B<sub>12</sub> from *Acetobacterium woodii*. *Eur J*  
900 *Biochem* 172:459-64.
- 901 111. Fu L, Niu B, Zhu Z, Wu S, Li W. 2012. CD-HIT: accelerated for clustering the next-  
902 generation sequencing data. *Bioinformatics* 28:3150-2.
- 903 112. Katoh K, Rozewicki J, Yamada KD. 2019. MAFFT online service: multiple sequence  
904 alignment, interactive sequence choice and visualization. *Brief Bioinform* 20:1160-1166.
- 905 113. Capella-Gutiérrez S, Silla-Martínez JM, Gabaldón T. 2009. trimAl: a tool for automated  
906 alignment trimming in large-scale phylogenetic analyses. *Bioinformatics* 25:1972-3.
- 907 114. Nguyen LT, Schmidt HA, von Haeseler A, Minh BQ. 2015. IQ-TREE: a fast and effective  
908 stochastic algorithm for estimating maximum-likelihood phylogenies. *Mol Biol Evol*  
909 32:268-74.
- 910 115. Letunic I, Bork P. 2016. Interactive tree of life (iTOL) v3: an online tool for the display  
911 and annotation of phylogenetic and other trees. *Nucleic Acids Res* 44:W242-5.

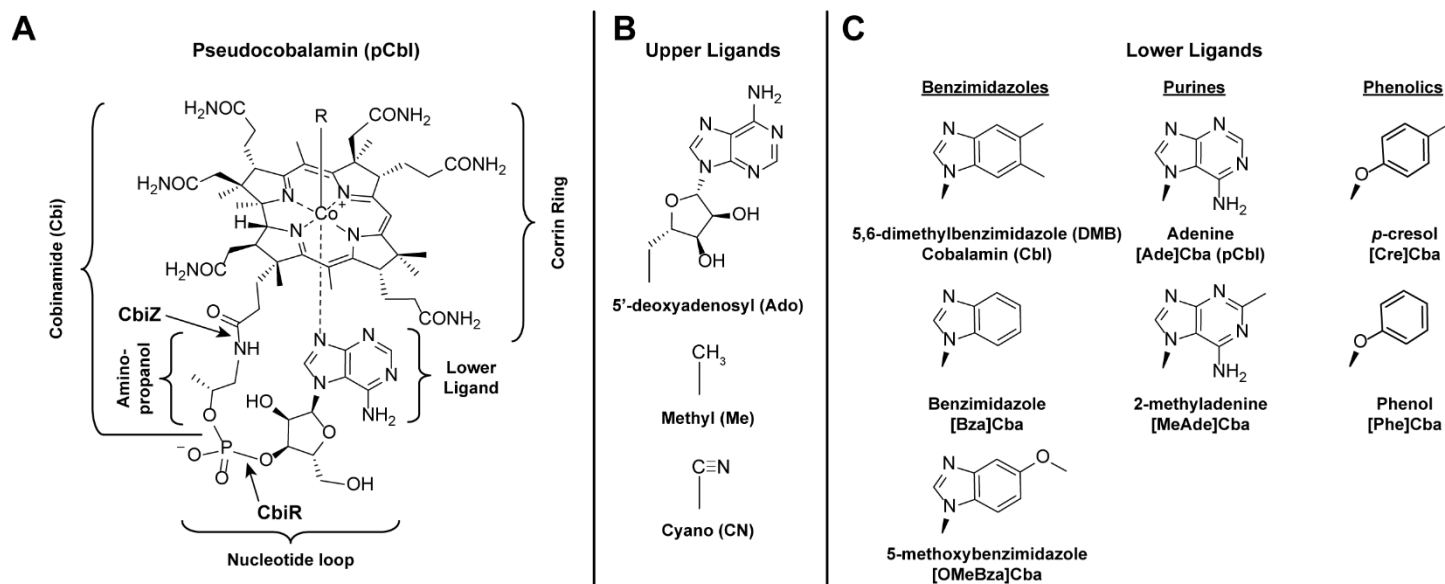

**Figure 1. Cobamide structures.**

A. Structure of pCbl. All cobamides are composed of a corrin ring containing a central cobalt ion and an upper (R) and lower ligand. In pCbl, the lower ligand is adenine. The lower ligand, together with the ribose and phosphate moieties, comprise the nucleotide loop, which is covalently attached to the corrin ring via an aminopropanol linker. The bonds hydrolyzed by the CbiZ amidohydrolase and the CbiR phosphodiesterase are indicated with arrows. The part of the molecule comprising Cbi is shown. Cobamides and their corrin-containing biosynthetic precursors and degradation products are together known as corrinoids.

B. Upper ligands (R) in cobamides, the catalytic center of the cofactor; prefixes used in the text to denote the upper ligand are shown in parentheses.

C. The three chemical classes of lower ligands present in cobamides. The structures of the seven cobamide lower ligands used in this study are shown. Names of the lower ligand base and abbreviations used for the corresponding cobamides are given below the structures.

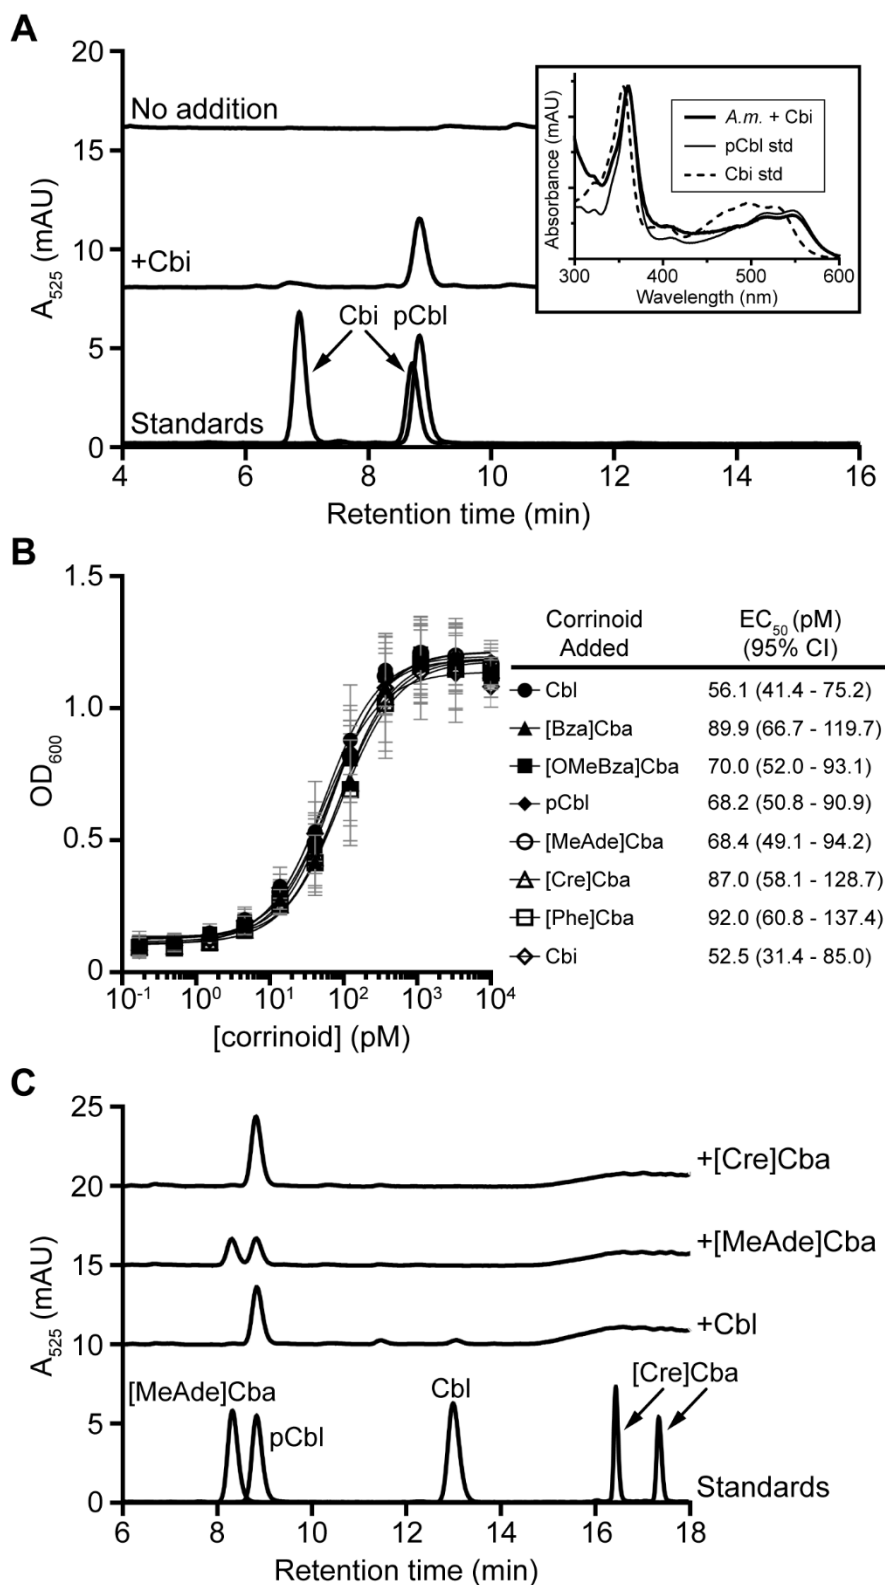

**Figure 2. *A. muciniphila* strain Muc<sup>T</sup> can salvage Cbi and remodel cobamides.**

A. HPLC analysis of corrinoid extractions from *A. muciniphila* grown with or without 10 nM Cbi for 72 h shows that *A. muciniphila* can salvage Cbi. Standards for Cbi and pCbl are shown at the bottom. Comparison of UV-Vis spectra (inset) of the HPLC peaks at 8.8 min shows that the corrinoid produced by *A. muciniphila* (*A.m.*) grown with Cbi (thick line) is similar to a pCbl standard (std) (thin line) and not a Cbi standard (dashed line). Spectra were normalized to each other based on their maxima to aid comparison.



B. *A. muciniphila* growth under methionine-deplete conditions. OD<sub>600</sub> of saturated cultures is shown after 29 h of growth with the indicated concentrations of each corrinoid. EC<sub>50</sub> values and their 95% confidence intervals for each corrinoid are given in the table. Data points and error bars represent the mean and standard deviation, respectively, of three biological replicates. The results are representative of three independent experiments.

C. HPLC analysis of corrinoid extractions from *A. muciniphila* grown with 10 nM Cbl, [MeAde]Cba, or [Cre]Cba for 72 h shows that *A. muciniphila* remodels cobamides to pCbl. Cobamide standards are shown at the bottom.

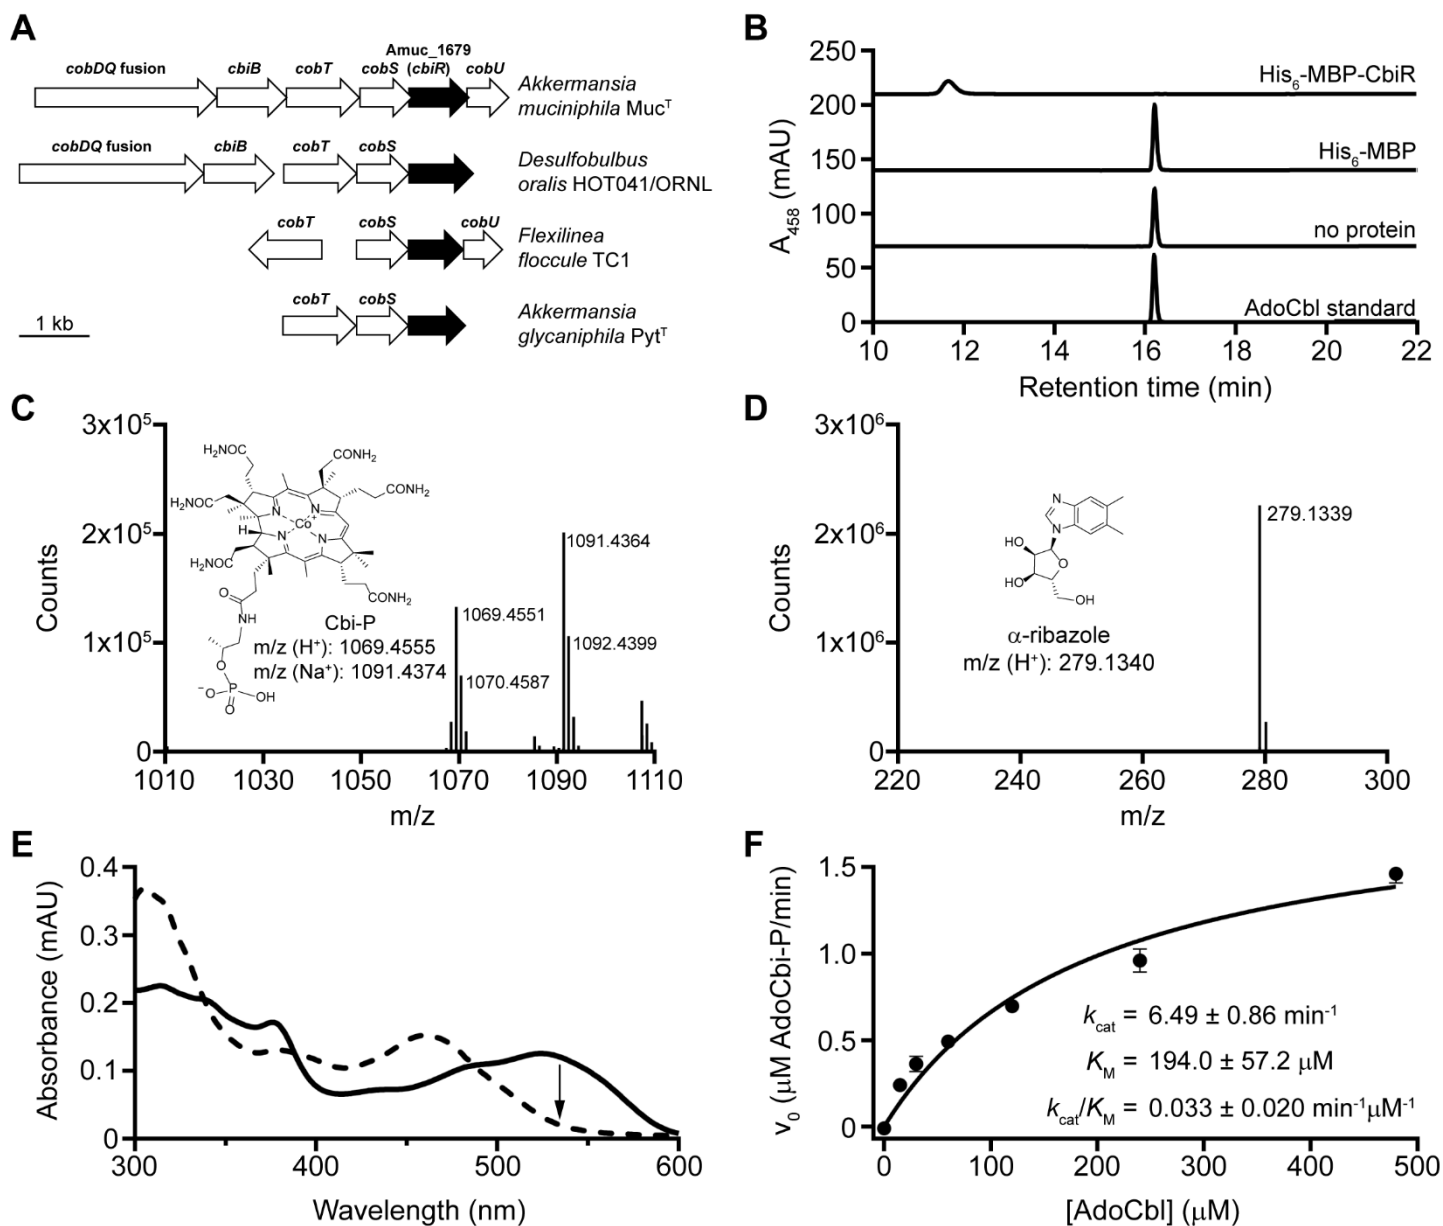

**Figure 3. Purified CbiR hydrolyzes AdoCbl to form AdoCbi-P and  $\alpha$ -ribazole *in vitro*.**

A. *A. muciniphila* Amuc\_1679 (*cbiR*) and homologs in other bacteria (black arrows) are located near cobamide biosynthesis genes (white arrows). An expanded genomic comparison is shown in Figure S3.

B. Purified CbiR converts AdoCbl to another corrinoid compound *in vitro* anaerobically. HPLC analysis of reactions containing 10  $\mu$ M AdoCbl incubated for 4 h with 0.1  $\mu$ M His<sub>6</sub>-MBP-CbiR, 0.1  $\mu$ M His<sub>6</sub>-MBP, or no protein is shown. An AdoCbl standard is shown at bottom.

C. The corrinoid product of His<sub>6</sub>-MBP-CbiR was purified by HPLC, exposed to light to remove the adenosyl upper ligand, and analyzed by MS. The structure and predicted m/z for Cbi-P are shown for comparison.

D. The second product of the *in vitro* reaction with His<sub>6</sub>-MBP-CbiR and AdoCbl was purified by HPLC and analyzed by MS. The structure and predicted m/z for  $\alpha$ -ribazole are shown for comparison.

E. Comparison of the UV-Vis spectra before (solid line) and after completion (dashed line) of the reaction of His<sub>6</sub>-MBP-CbiR with 30  $\mu$ M AdoCbl shows a decrease in absorbance at 534 nm (arrow).

F. Michaelis-Menten kinetic analysis of His<sub>6</sub>-MBP-CbiR with AdoCbl. Reactions contained 0.3 μM His<sub>6</sub>-MBP-CbiR. Points and error bars represent the mean and standard deviation, respectively. Kinetic constants were determined from two independent experiments, each with three technical replicates.

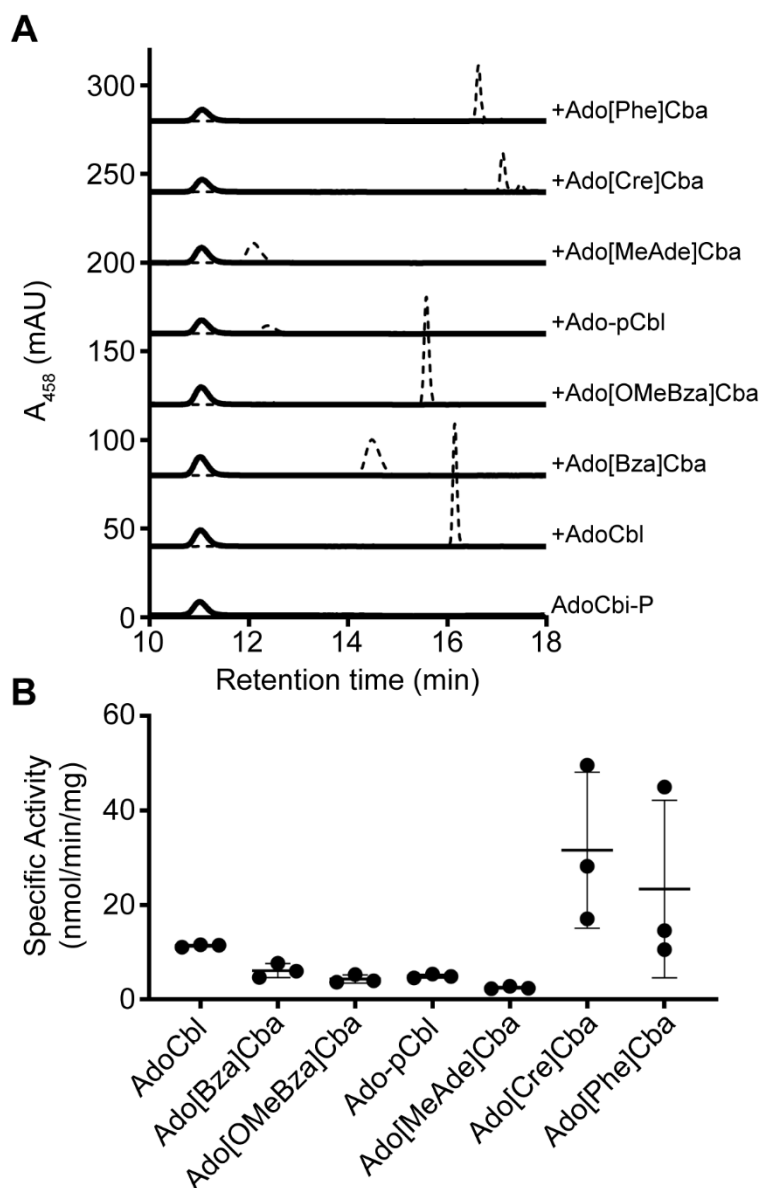

**Figure 4. CbiR hydrolyzes many cobamides to form AdoCbi-P**

A. HPLC analysis of *in vitro* reactions with different cobamides (10  $\mu$ M), quenched after 18 h, is shown for reactions containing 0.1  $\mu$ M His<sub>6</sub>-MBP-CbiR (solid lines) or without enzyme (dashed lines). A sample of purified AdoCbi-P is shown at the bottom.

B. Specific activity of His<sub>6</sub>-MBP-CbiR with different cobamide substrates. 0.3  $\mu$ M His<sub>6</sub>-MBP-CbiR was incubated with 30  $\mu$ M of each cobamide individually and the rate of AdoCbi-P production was determined based on HPLC measurements at three time points. The lines represent the mean and standard deviation for three independent experiments.

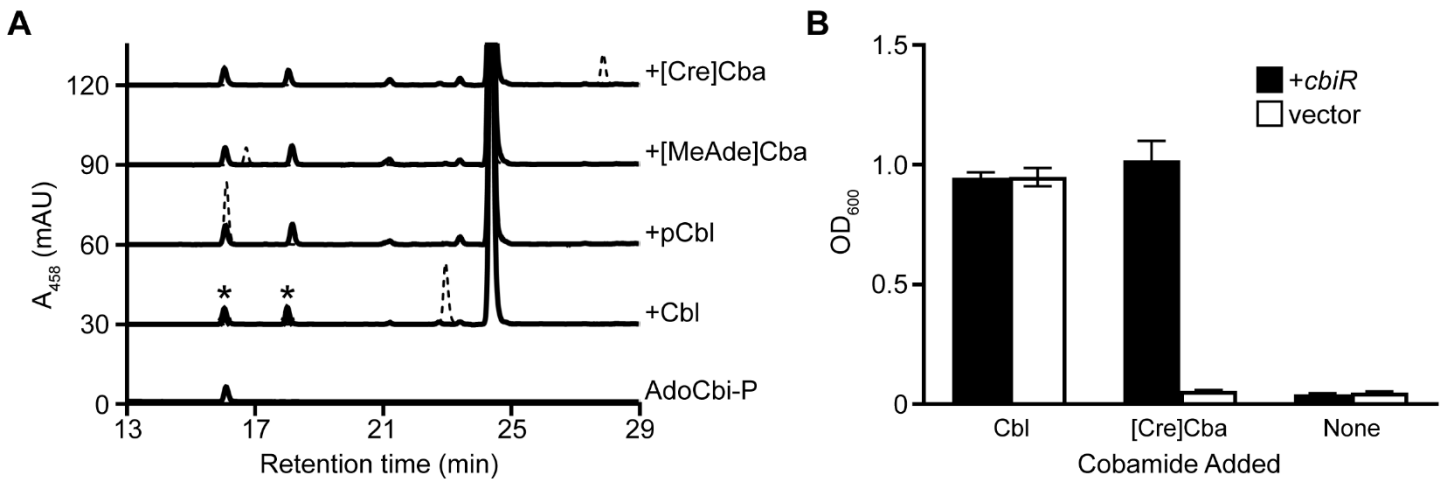

**Figure 5. CbiR mediates cobamide remodeling in *E. coli***

A. CbiR hydrolyzes cobamides in *E. coli*. *A. muciniphila cbiR* was expressed in an *E. coli* strain with the *cobTSU* operon and *cobC* gene deleted to prevent modification of cobamide hydrolysis products. Corrinoid extractions of *E. coli* strains carrying pETmini-*cbiR* (solid lines) or the pETmini empty vector (dashed lines), grown with 10 nM Cbl, pCbl, [MeAde]Cba, or [Cre]Cba were analyzed by HPLC. A sample of purified AdoCbi-P is shown at the bottom. Corrinoids labeled with asterisks were purified for MS analysis (Fig. S5). The large peak at 24.5 min corresponds to a flavin that is present in all of the corrinoid extractions.

B. Expression of *A. muciniphila cbiR* enables growth of *E. coli* on ethanolamine. Wild type *E. coli* MG1655 harboring pETmini-*cbiR* (black bars) or the pETmini empty vector (white bars) was cultured in minimal medium containing ethanolamine as the sole nitrogen source and 1  $\mu$ M DMB. Cultures were supplemented with 100 nM Cbl, [Cre]Cba, or no cobamide and  $OD_{600}$  measurements are shown after 72 h of growth. Bars and error bars represent the mean and standard deviation, respectively, of three biological replicates.



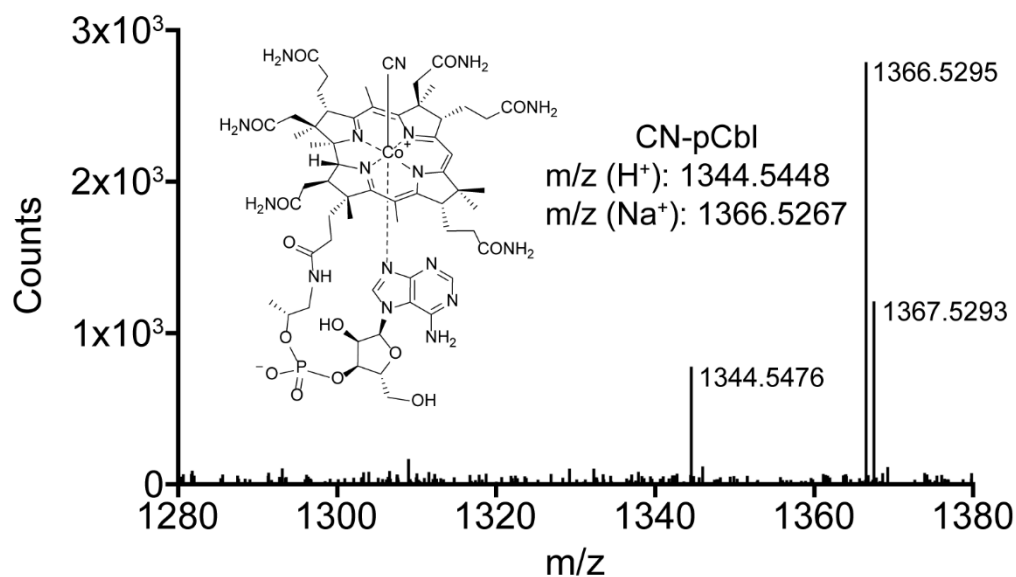

Figure S1. The corrinoid produced by *A. muciniphila* when grown with Cbi was purified by HPLC and analyzed by MS. The structure and predicted m/z for CN-pCbl are shown for comparison.

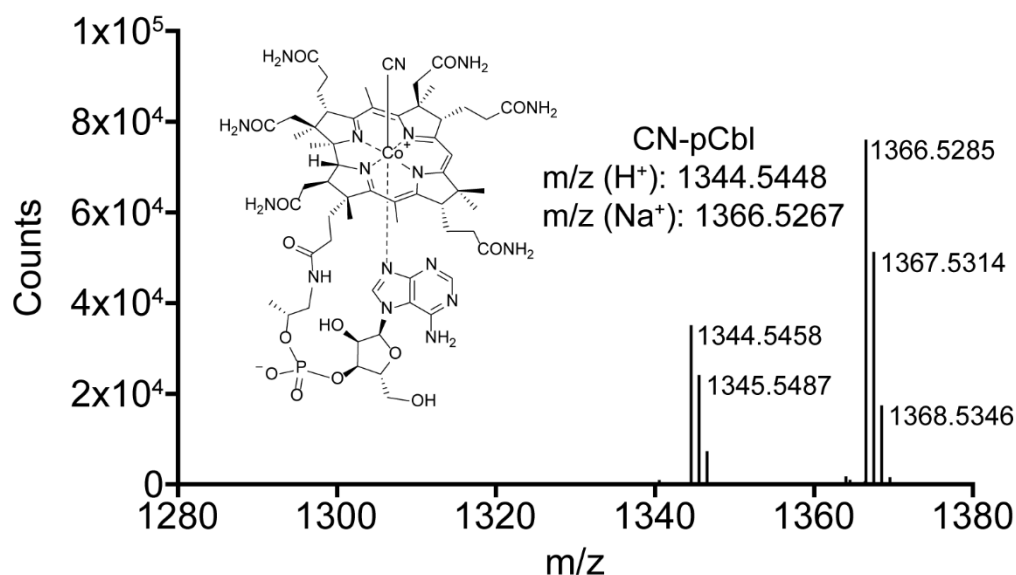

Figure S2. The corrinoid produced by *A. muciniphila* when grown with Cbl was purified by HPLC and analyzed by MS. The structure and predicted m/z for CN-pCbl are shown for comparison.

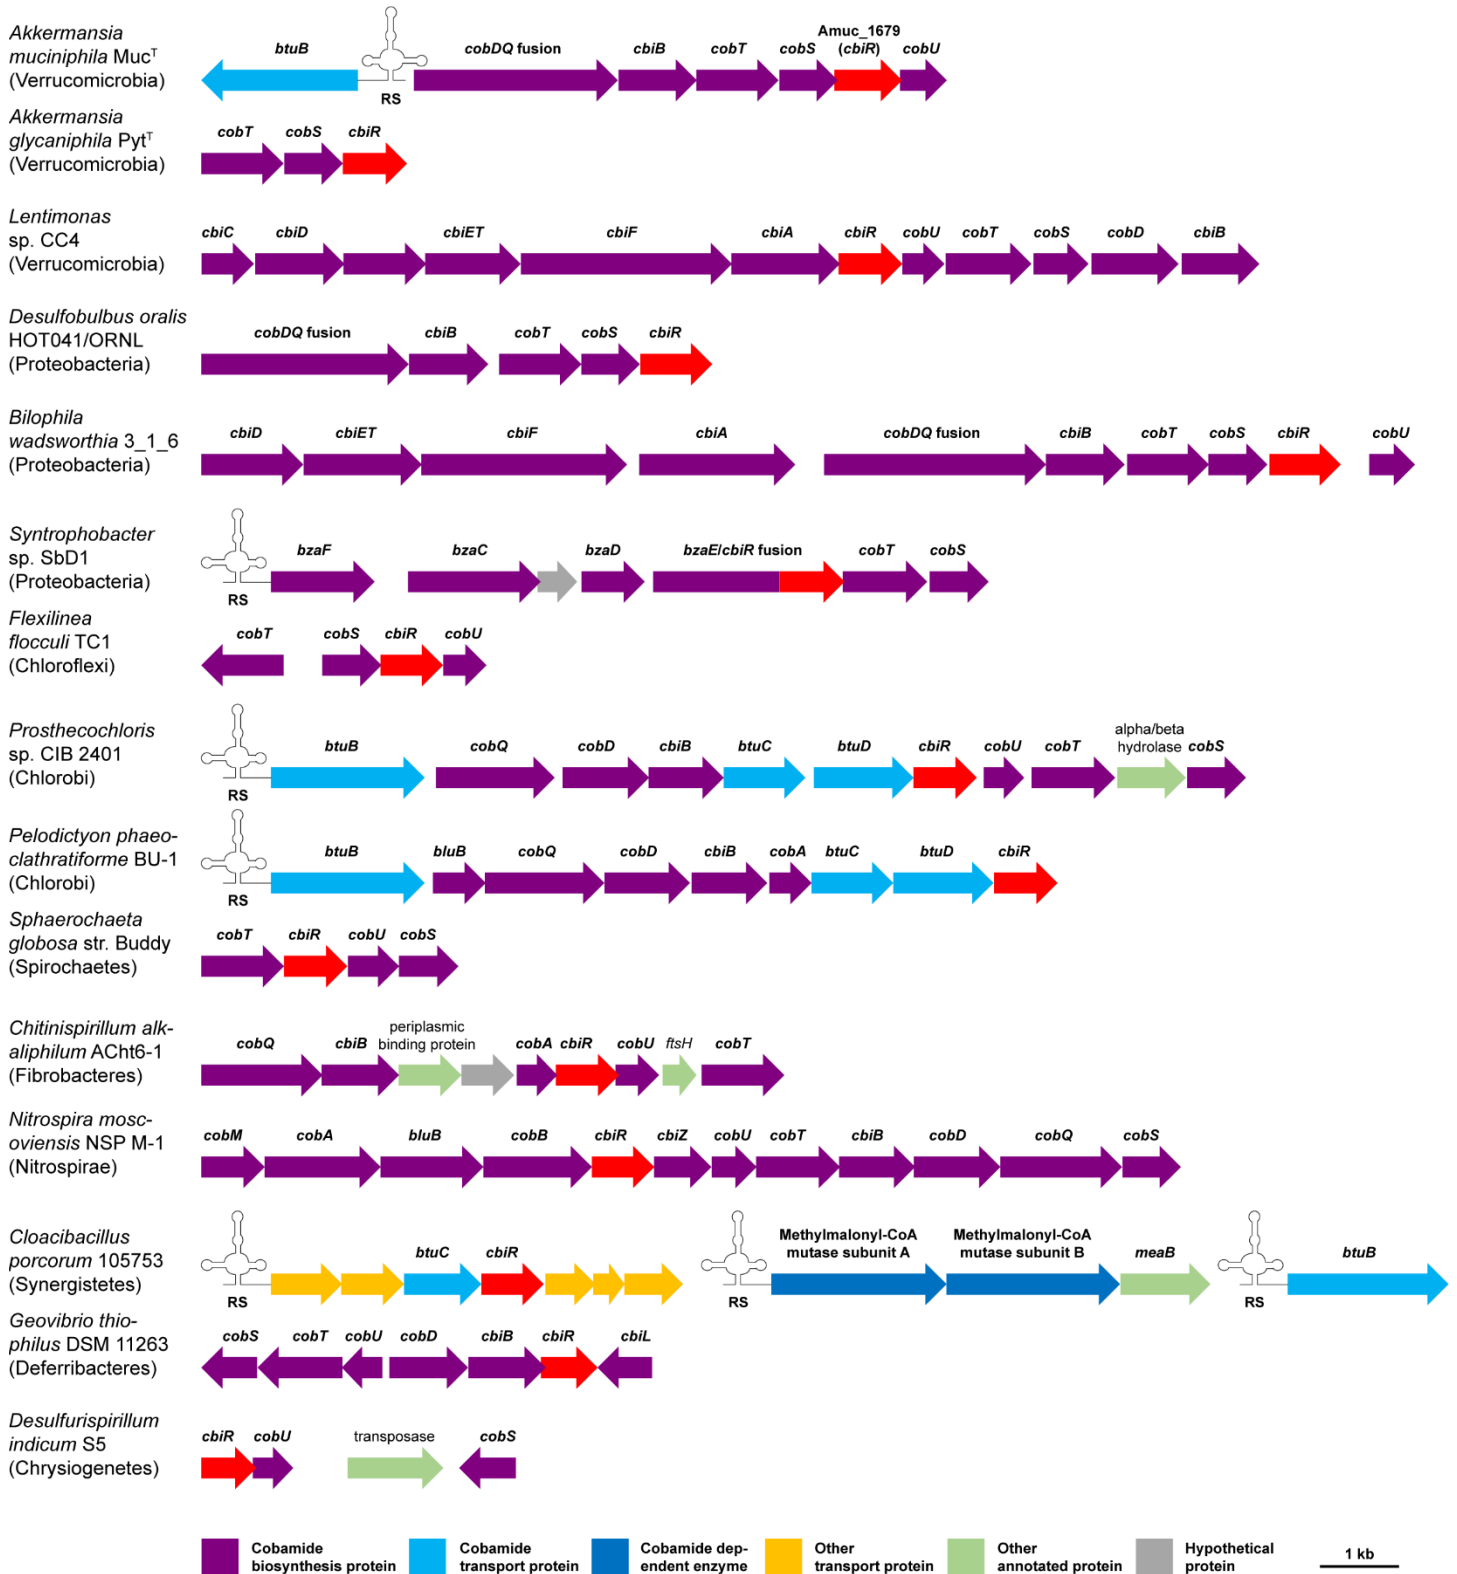

Figure S3. Expanded list of homologs of Amuc\_1679 (*cbiR*, red arrows). Species and strain names are given, with phylum names in parentheses. RS denotes a predicted cobalamin riboswitch. The lengths and positions of the ORFs are drawn to scale.



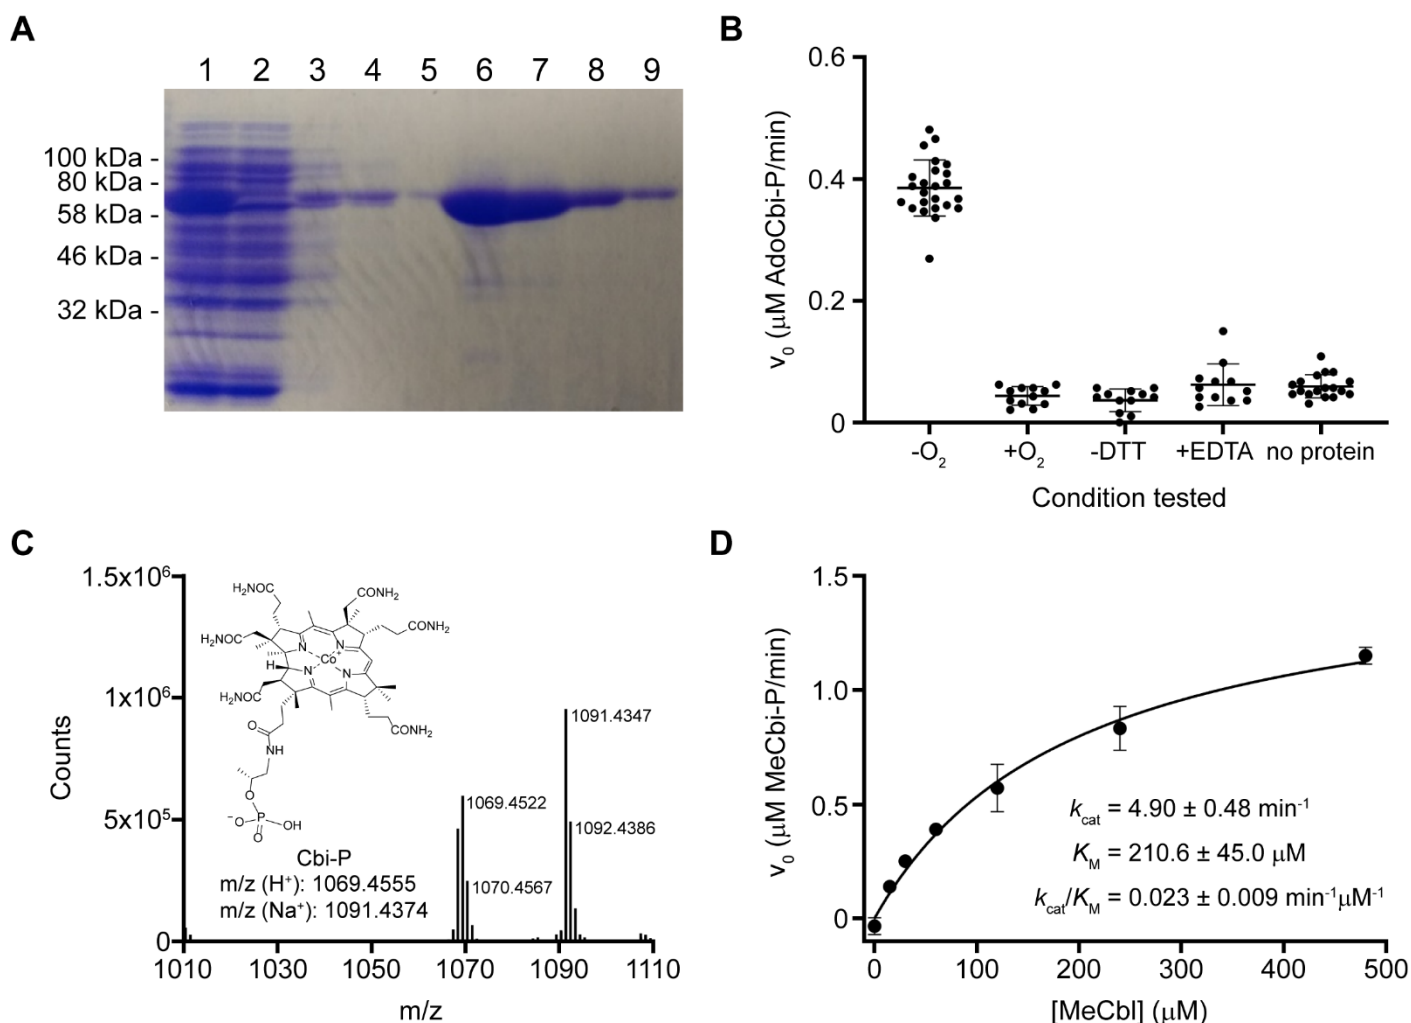

Figure S4. Biochemical characterization of His<sub>6</sub>-MBP-CbiR.

A. SDS-PAGE gel of purification of His<sub>6</sub>-MBP-CbiR with Ni-NTA resin. Lane 1: Cell lysate, Lane 2: Flowthrough, Lanes 3-5: Wash fractions, Lanes 6-9: Elution fractions. His<sub>6</sub>-MBP-CbiR has a predicted molecular weight of 77 kDa.

B. *In vitro* characterization of His<sub>6</sub>-MBP-CbiR. The reaction rates were determined for 0.3  $\mu\text{M}$  His<sub>6</sub>-MBP-CbiR incubated with 30  $\mu\text{M}$  AdoCbl. The standard reaction mixture used throughout the manuscript (labeled as -O<sub>2</sub>) contained 50 mM Tris, pH 8.45-8.55 and 1 mM DTT and was performed in an anaerobic chamber. Activity was also measured in ambient O<sub>2</sub> (+O<sub>2</sub>), with DTT omitted (-DTT), with 3  $\mu\text{M}$  EDTA added (+EDTA), and in the absence of His<sub>6</sub>-MBP-CbiR (no protein). The reaction was monitored by measuring A<sub>534</sub> over time. Lines and error bars show the mean and standard deviation, respectively.

C. The corrinoid product of His<sub>6</sub>-MBP-CbiR incubated with MeCbl was purified by HPLC, exposed to light to remove the methyl upper ligand, and analyzed by MS. The structure and predicted m/z for Cbi-P are shown for comparison.

D. Michaelis-Menten kinetic analysis of His<sub>6</sub>-MBP-CbiR with MeCbl. His<sub>6</sub>-MBP-CbiR was tested at 0.3  $\mu\text{M}$  and the reaction was monitored by measuring the decrease in absorbance at 527 nm (A<sub>527</sub>). The experiment was performed twice with similar results. Data from a representative experiment with three technical replicates are shown. Kinetic constants were calculated using data from all six replicates.

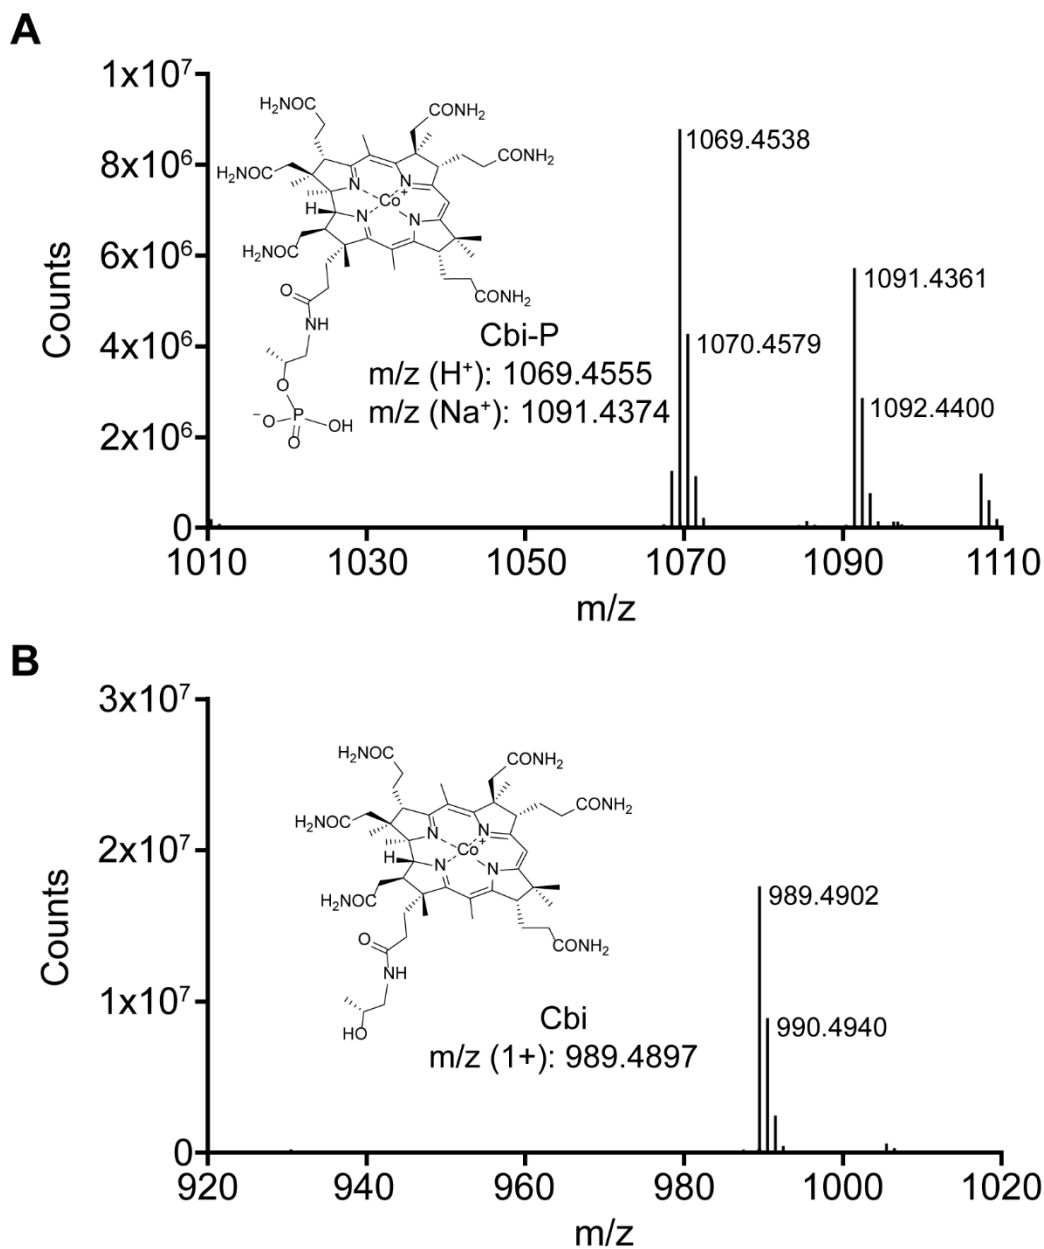

Figure S5. MS analysis of CbiR hydrolysis products extracted from *E. coli*.

MS analysis of the corrinoid products labeled with asterisks in Fig. 5A are shown for the peaks at A. 16 min and B. 18 min. The corrinoids were purified by HPLC and exposed to light to remove the adenosyl upper ligand prior to analysis by MS. The structures and predicted m/z for Cbi-P and Cbi are shown for comparison.

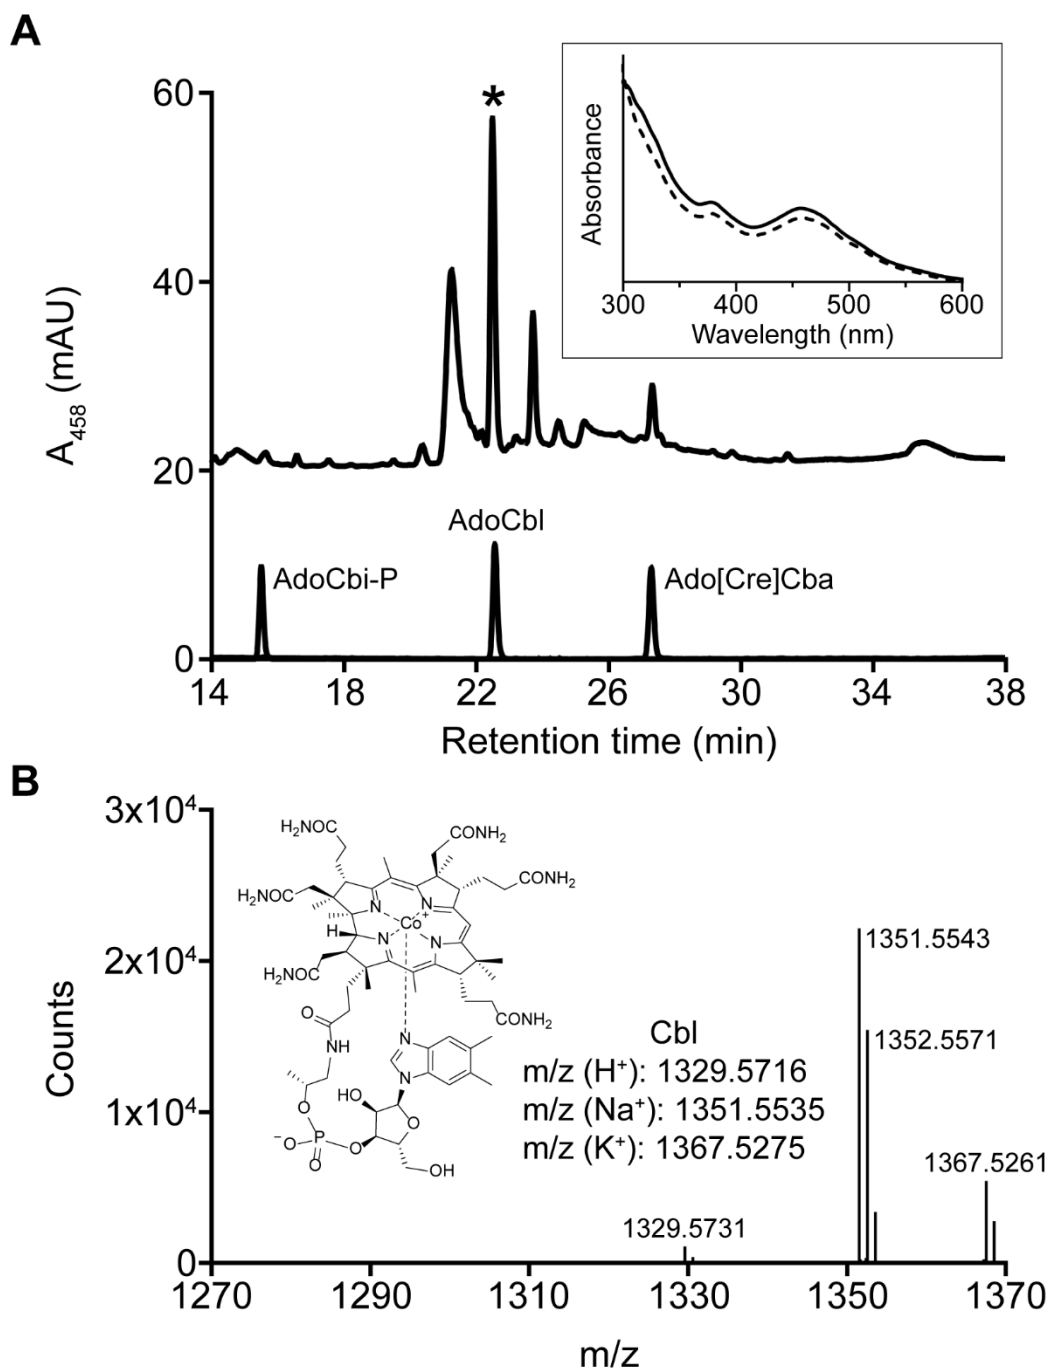

Figure S6. Cobamide remodeling of [Cre]Cba to Cbl in *E. coli* expressing *cbiR*.

A. Remodeling of [Cre]Cba to Cbl in *E. coli*. Wild type strain MG1655 containing pETmini-*cbiR* was grown in 1L minimal medium with ethanolamine supplemented with 100 nM [Cre]Cba and 1  $\mu$ M DMB. Corrinoids were extracted and analyzed by HPLC. AdoCbl and Ado[Cre]Cba standards and purified AdoCbi-P are shown at the bottom. Comparison of the UV-Vis spectra of AdoCbl (dashed line) and the starred peak (solid line) are shown in the inset; spectra were normalized to each other at the local maxima at 458 nm to aid comparison. The spectrum of AdoCbl differs from that in Fig. 3E due to the acidic HPLC conditions.

B. MS analysis of the peak labeled with an asterisk in panel A. The corrinoid was purified by HPLC and exposed to light to remove the adenosyl upper ligand prior to analysis by MS. The structure and predicted m/z for Cbl are shown for comparison.

**Table S1. Homologs of *A. muciniphila* CbiR**

| Organism                                               | Phylum                  | Isolation Source                                                                           | Accession number | E value | % Identity to <i>A. muciniphila</i> MucT CbiR | Adjacent to and in same orientation as cobamide biosynthesis gene(s)? |
|--------------------------------------------------------|-------------------------|--------------------------------------------------------------------------------------------|------------------|---------|-----------------------------------------------|-----------------------------------------------------------------------|
| Akkermansia muciniphila strain MucT                    | Verrucomicrobia         | human feces                                                                                | WP_081429195.1   |         | (100)                                         | Y                                                                     |
| Akkermansia glycaniphila strain Pyt                    | Verrucomicrobia         | reticulated python feces                                                                   | OCA02218.1       | 2.E-115 | 62                                            | Y                                                                     |
| Akkermansia sp. strain BIOML-A47                       | Verrucomicrobia         | human feces                                                                                | KAA3306648.1     | 2.E-174 | 84                                            | Y                                                                     |
| Akkermansia sp. strain BIOML-A60                       | Verrucomicrobia         | human feces                                                                                | KAA3165711.1     | 1.E-175 | 85                                            | Y                                                                     |
| Akkermansia sp. strain KLE1797                         | Verrucomicrobia         | human feces                                                                                | KXT49684.1       | 7.E-173 | 87                                            | Y                                                                     |
| Aminomonas paucivorans strain DSM 12260                | Synergistetes           | anaerobic lagoon of a dairy wastewater treatment plant (Columbia)                          | EFQ22869.1       | 9.E-15  | 28                                            | N                                                                     |
| anaerobic bacterium MO-CFX2                            | Chloroflexi             | marine sediment (Shimokita Peninsula, Japan)                                               | WP_162909697.1   | 5.E-27  | 31                                            | Y                                                                     |
| Anaerolineaceae bacterium isolate AS05jafATM_106       | Chloroflexi             | anaerobic digestion of organic wastes under variable temperature conditions and feedstocks | HHV05068.1       | 5.E-35  | 35                                            | Y                                                                     |
| Anaerolineaceae bacterium oral taxon 439 strain W11661 | Chloroflexi             | human subgingival dental plaque                                                            | AOH42763.1       | 7.E-35  | 35                                            | Y                                                                     |
| Anaerolineae bacterium isolate AS06rmzACSIP_331        | Chloroflexi             | anaerobic digestion of organic wastes under variable temperature conditions and feedstocks | NLF10836.1       | 4.E-24  | 30                                            | Y                                                                     |
| Anaerolineae bacterium isolate HyVt-475                | Chloroflexi             | rock sample from hydrothermal vent (Lau Basin, Tonga)                                      | HFD38495.1       | 6.E-23  | 30                                            | Y                                                                     |
| Anaerolineae bacterium isolate Nak57                   | Chloroflexi             | sulfidic hot spring (Azumino, Japan)                                                       | PWH15486.1       | 3.E-37  | 34                                            | Y                                                                     |
| Anaerolineae bacterium isolate SpSt-822                | Chloroflexi             | mud, sediment (Yellowstone National Park, USA)                                             | HGX29340.1       | 2.E-25  | 30                                            | Y                                                                     |
| Anoxybacter fermentans strain DY22613                  | Firmicutes              | deep-sea hydrothermal vent                                                                 | AZR72222.1       | 1.E-04  | 25                                            | N                                                                     |
| Ardenticatena maritima strain 110S                     | Chloroflexi             | hydrothermal field (Yamagawa, Japan)                                                       | GAP62401.1       | 3.E-16  | 30                                            | Y                                                                     |
| Bellilinea caldifistulae isolate SpSt-556              | Chloroflexi             | hot spring sediment (British Columbia, Canada)                                             | HGS87922.1       | 2.E-30  | 33                                            | Y                                                                     |
| Bilophila sp. strain 4_1_30                            | Proteobacteria          | human feces                                                                                | EGW44733.1       | 5.E-66  | 41                                            | Y                                                                     |
| Bilophila wadsworthia strain 3_1_6                     | Proteobacteria          | human feces                                                                                | EFV46162.1       | 2.E-64  | 40                                            | Y                                                                     |
| Burkholderiales bacterium isolate AS22ysBPME_216       | Proteobacteria          | anaerobic digestion of organic wastes under variable temperature conditions and feedstocks | NMA29311.1       | 1.E-14  | 28                                            | Y                                                                     |
| Caldilinea aerophila isolate SpSt-289                  | Chloroflexi             | hot spring sediment (British Columbia, Canada)                                             | HDX32185.1       | 2.E-24  | 28                                            | Y                                                                     |
| Caldilinea aerophila strain DSM 14535                  | Chloroflexi             | sulfur-turf sample in a hot spring (Takayama, Japan)                                       | BAL99387.1       | 4.E-24  | 28                                            | N                                                                     |
| Calditerrivibrio nitroreducens strain DSM 19672        | Deferribacteres         | terrestrial hot spring (Lake Nojiri, Japan)                                                | ADR19788.1       | 3.E-05  | 26                                            | Y                                                                     |
| candidate division KSB1 bacterium isolate B7_G2        | Candidate division KSB1 | deep-sea hydrothermal vent sediment (Guaymas Basin, Mexico)                                | RKY75023.1       | 6.E-16  | 26                                            | Y                                                                     |
| candidate division KSB1 bacterium isolate B39_G15      | Candidate division KSB1 | deep-sea hydrothermal vent sediment (Guaymas Basin, Mexico)                                | RKY84749.1       | 7.E-16  | 26                                            | Y                                                                     |

|                                                                           |                               |                                                                                        |              |        |    |   |
|---------------------------------------------------------------------------|-------------------------------|----------------------------------------------------------------------------------------|--------------|--------|----|---|
| candidate division KSB1 bacterium isolate CS2-K093                        | Candidate division KSB1       | pelagic sediment (Gulf of Kutch, India)                                                | NIV91984.1   | 2.E-25 | 33 | Y |
| Candidatus Abyssubacteria bacterium isolate SURF_5                        | Candidatus Abyssubacteria     | deeply circulating subsurface aquifer fluids (Lead, SD, USA)                           | RJP21339.1   | 7.E-07 | 27 | N |
| Candidatus Acidulodesulfobacterium acidiphilum isolate AP4                | Proteobacteria                | acid mine drainage (Guangzhou, China)                                                  | RZV40568.1   | 3.E-05 | 31 | N |
| Candidatus Acidulodesulfobacterium ferriphilum isolate AP3                | Proteobacteria                | acid mine drainage (Guangzhou, China)                                                  | RZD14164.1   | 2.E-04 | 27 | N |
| Candidatus Fermentibacter daniensis isolate Ran_1                         | Candidatus Fermentibacteria   | enrichment reactor seeded with activated sludge (Randers, Denmark)                     | KZD16791.1   | 8.E-25 | 31 | Y |
| Candidatus Handelsmanbacteria bacterium isolate RIFCSPLOWO2_12_FULL_64_10 | Candidatus Handelsmanbacteria | Rifle well FP-101 (Rifle, CO, USA)                                                     | OGG49119.1   | 3.E-28 | 34 | Y |
| Candidatus Latescibacteria bacterium isolate UBA9260                      | Candidatus Latescibacteria    | marine                                                                                 | HAA78539.1   | 2.E-28 | 32 | Y |
| Candidatus Methylospirillum limnetica strain Zug                          | candidate division NC10       | freshwater (Lake Zug, Switzerland)                                                     | PTL35634.1   | 4.E-21 | 32 | Y |
| Candidatus Methylospirillum oxyfera isolate SB1                           | candidate division NC10       | biomass on anode of bioreactor after 21 days (Ooijpolder, Netherlands)                 | KAB2960242.1 | 8.E-18 | 30 | Y |
| Candidatus Nitrosotenuis sp. isolate GW928_bin.18                         | Thaumarchaeota                | groundwater (Oak Ridge, TN, USA)                                                       | TBR21516.1   | 4.E-16 | 28 | Y |
| Candidatus Raymondbacteria bacterium isolate RifOxyA12_full_50_37         | Candidatus Raymondbacteria    | Rifle well CD01 (Rifle, CO, USA)                                                       | OGJ89256.1   | 8.E-16 | 29 | Y |
| Candidatus Thermofonsia Clade 1 bacterium isolate CP2_2F                  | Chloroflexi                   | alkaline, sulfidic hot spring Cone Pool 2 (Azumino, Japan)                             | PJF30363.1   | 4.E-42 | 36 | Y |
| Candidatus Woesebacteria bacterium isolate B4_G12                         | Candidatus Woesebacteria      | deep-sea hydrothermal vent sediments (Guaymas Basin, Mexico)                           | RLC29799.1   | 1.E-22 | 30 | Y |
| Chitinospirillum alkaliphilum strain AChT6-1                              | Fibrobacteres                 | hypersaline alkaline lake (Wadi al Natrun, Egypt)                                      | KMQ49640.1   | 1.E-19 | 29 | Y |
| Chlorobaculum limnaeum strain DSM1677                                     | Chlorobi                      | Lake Kinnevet, Israel                                                                  | AOS83552.1   | 3.E-22 | 32 | Y |
| Chlorobaculum parvum strain NCIB 8327 DSM 263                             | Chlorobi                      | freshwater                                                                             | ACF11581.1   | 3.E-19 | 31 | Y |
| Chlorobaculum sp. strain 24CR                                             | Chlorobi                      | water (Carmel River, CA, USA)                                                          | RXK88351.1   | 3.E-21 | 31 | Y |
| Chlorobaculum tepidum strain TLS                                          | Chlorobi                      | high-sulfide hot spring (Rotorua, New Zealand)                                         | AAM72179.1   | 1.E-17 | 29 | Y |
| Chlorobaculum thiosulfatiphilum strain DSM 249                            | Chlorobi                      | tassajara hot spring (CA, USA)                                                         | TNJ40258.1   | 2.E-22 | 31 | Y |
| Chlorobiaceae bacterium isolate June25_Bin_2                              | Chlorobi                      | freshwater lake (Trout Bog Lake, WI, USA)                                              | NMW21650.1   | 4.E-17 | 27 | Y |
| Chlorobiaceae bacterium isolate Oct13_Bin_1                               | Chlorobi                      | freshwater lake (Trout Bog Lake, WI, USA)                                              | NMW18963.1   | 6.E-16 | 28 | Y |
| Chlorobium chlorochromatii strain CaD3                                    | Chlorobi                      | eutrophic lake (Brandenburg, Germany)                                                  | ABB28338.1   | 6.E-16 | 30 | N |
| Chlorobium ferrooxidans strain DSM 13031                                  | Chlorobi                      | ditch sediment (Konstanz, Germany)                                                     | EAT58859.1   | 6.E-17 | 27 | Y |
| Chlorobium limicola strain DSM 245                                        | Chlorobi                      | hot spring (CA, USA)                                                                   | ACD90141.1   | 5.E-17 | 29 | Y |
| Chlorobium limicola strain Frasassi                                       | Chlorobi                      | sediment-water interface in an artificial aquarium in the Frasassi cave system (Italy) | KUL32430.1   | 3.E-16 | 29 | N |
| Chlorobium phaeobacteroides strain BS1                                    | Chlorobi                      | chemocline of the Black Sea                                                            | ACE04425.1   | 3.E-17 | 29 | N |
| Chlorobium phaeobacteroides strain DSM 266                                | Chlorobi                      | Lake Blankvann (Norway)                                                                | ABL65163.1   | 3.E-24 | 33 | Y |

|                                                  |             |                                                                                            |                |        |    |   |
|--------------------------------------------------|-------------|--------------------------------------------------------------------------------------------|----------------|--------|----|---|
| Chlorobium phaeovibrioides strain BrKhr17        | Chlorobi    | Lake Bolshye Khruslomeny, water chemocline zone                                            | RTY40038.1     | 7.E-18 | 31 | Y |
| Chlorobium phaeovibrioides strain DSM 265        | Chlorobi    | saline intertidal flat                                                                     | ABP36835.1     | 7.E-20 | 31 | Y |
| Chlorobium phaeovibrioides strain PhvTcv-s14     | Chlorobi    | water chemocline zone (Russia)                                                             | QEQ57063.1     | 6.E-18 | 31 | Y |
| Chlorobium sp. isolate L227-2013-22              | Chlorobi    | freshwater lake (Kenora, Ontario, Canada)                                                  | TLU55211.1     | 2.E-21 | 31 | Y |
| Chlorobium sp. isolate L227-2013-55              | Chlorobi    | freshwater lake (Kenora, Ontario, Canada)                                                  | TLU57894.1     | 8.E-19 | 29 | N |
| Chlorobium sp. isolate L227-2013-56              | Chlorobi    | freshwater lake (Kenora, Ontario, Canada)                                                  | TLU51735.1     | 9.E-26 | 30 | Y |
| Chlorobium sp. isolate L227-S-6D                 | Chlorobi    | freshwater lake (Kenora, Ontario, Canada)                                                  | TLU81745.1     | 6.E-17 | 29 | N |
| Chlorobium sp. isolate L304-S-6D                 | Chlorobi    | freshwater lake (Kenora, Ontario, Canada)                                                  | TLU83342.1     | 2.E-21 | 31 | Y |
| Chlorobium sp. isolate L442-64                   | Chlorobi    | freshwater lake (Kenora, Ontario, Canada)                                                  | TLU54122.1     | 4.E-18 | 29 | N |
| Chlorobium sp. isolate UBA8843                   | Chlorobi    | synthetic microbial community                                                              | HCD35528.1     | 9.E-20 | 31 | Y |
| Chlorobium sp. strain BLA1                       | Chlorobi    | Brownie Lake (Minneapolis, MN, USA)                                                        | NHQ60379.1     | 2.E-17 | 28 | Y |
| Chlorobium sp. strain KB01                       | Chlorobi    | meromictic lake (Kabuno Bay, Congo)                                                        | WP_076791818.1 | 4.E-13 | 27 | Y |
| Chlorobium sp. strain N1                         | Chlorobi    | sediment (Norsminde Fjord, Denmark)                                                        | TCD47456.1     | 8.E-21 | 30 | Y |
| Chloroflexi bacterium isolate AS06rmzACSIP_450   | Chloroflexi | anaerobic digestion of organic wastes under variable temperature conditions and feedstocks | NLW71729.1     | 7.E-33 | 32 | Y |
| Chloroflexi bacterium isolate AS15tIH2ME_173     | Chloroflexi | anaerobic digestion of organic wastes under variable temperature conditions and feedstocks | NLA79515.1     | 6.E-35 | 34 | Y |
| Chloroflexi bacterium isolate AS26fmACSIPLY_11   | Chloroflexi | anaerobic digestion of organic wastes under variable temperature conditions and feedstocks | HHY58046.1     | 2.E-22 | 30 | Y |
| Chloroflexi bacterium isolate AS27yjCOA_1        | Chloroflexi | anaerobic digestion of organic wastes under variable temperature conditions and feedstocks | NMB61392.1     | 1.E-36 | 31 | Y |
| Chloroflexi bacterium isolate AS27yjCOA_123      | Chloroflexi | anaerobic digestion of organic wastes under variable temperature conditions and feedstocks | NMB86957.1     | 4.E-33 | 33 | Y |
| Chloroflexi bacterium isolate AS27yjCOA_124      | Chloroflexi | anaerobic digestion of organic wastes under variable temperature conditions and feedstocks | NMB61392.1     | 1.E-36 | 31 | Y |
| Chloroflexi bacterium isolate AS27yjCOA_4        | Chloroflexi | anaerobic digestion of organic wastes under variable temperature conditions and feedstocks | NMC52453.1     | 1.E-23 | 33 | Y |
| Chloroflexi bacterium isolate AS27yjCOA_56       | Chloroflexi | anaerobic digestion of organic wastes under variable temperature conditions and feedstocks | NMC45596.1     | 4.E-35 | 32 | Y |
| Chloroflexi bacterium isolate B46_G1             | Chloroflexi | deep-sea hydrothermal vent sediment (Guaymas Basin, Mexico)                                | RLC71331.1     | 5.E-39 | 35 | Y |
| Chloroflexi bacterium isolate CFX1               | Chloroflexi | marine ANAMMOX bioreactor                                                                  | KAA3663928.1   | 4.E-35 | 34 | N |
| Chloroflexi bacterium isolate CR04               | Chloroflexi | marine sediment (Pacific Ocean)                                                            | TDI86467.1     | 2.E-33 | 33 | Y |
| Chloroflexi bacterium isolate HGW-Chloroflexi-1  | Chloroflexi | groundwater (Horonobe, Japan)                                                              | PKO23290.1     | 1.E-33 | 34 | Y |
| Chloroflexi bacterium isolate HGW-Chloroflexi-10 | Chloroflexi | groundwater (Horonobe, Japan)                                                              | PKO13937.1     | 1.E-35 | 34 | Y |
| Chloroflexi bacterium isolate M_MetaBat.114      | Chloroflexi | deepsea hydrothermal sulfide chimney (Pacific Ocean)                                       | NOZ27705.1     | 8.E-31 | 30 | Y |
| Chloroflexi bacterium isolate metabat2.725       | Chloroflexi | Prairie Pothole Region wetland sediment (Cottonwood Lake, ND, USA)                         | RPH61221.1     | 1.E-37 | 35 | Y |

|                                                        |                 |                                                                                                                      |                |        |    |   |
|--------------------------------------------------------|-----------------|----------------------------------------------------------------------------------------------------------------------|----------------|--------|----|---|
| Chloroflexi bacterium isolate RBG_16_54_18             | Chloroflexi     | Rifle well D04 (Rifle, CO, USA)                                                                                      | OGO29581.1     | 8.E-40 | 34 | Y |
| Chloroflexi bacterium isolate SpSt-271                 | Chloroflexi     | hot spring sediment (British Columbia, Canada)                                                                       | HDY04783.1     | 4.E-35 | 35 | Y |
| Chloroflexi bacterium isolate SpSt-326                 | Chloroflexi     | hot spring sediment (British Columbia, Canada)                                                                       | HDV36418.1     | 2.E-36 | 35 | Y |
| Chloroflexi bacterium isolate SpSt-327                 | Chloroflexi     | hot spring sediment (British Columbia, Canada)                                                                       | HEG74209.1     | 5.E-38 | 36 | Y |
| Chloroflexi bacterium isolate SpSt-422                 | Chloroflexi     | hot spring sediment (British Columbia, Canada)                                                                       | HFN11568.1     | 5.E-34 | 32 | Y |
| Chloroflexi bacterium isolate SpSt-438                 | Chloroflexi     | hot spring sediment (British Columbia, Canada)                                                                       | HFM60814.1     | 7.E-33 | 34 | Y |
| Chloroflexi bacterium isolate SpSt-474                 | Chloroflexi     | hot spring sediment (British Columbia, Canada)                                                                       | HGU24517.1     | 2.E-37 | 35 | Y |
| Chloroflexi bacterium isolate SpSt-552                 | Chloroflexi     | hot spring sediment (British Columbia, Canada)                                                                       | HGQ02489.1     | 2.E-31 | 32 | Y |
| Chloroflexi bacterium isolate SpSt-583                 | Chloroflexi     | hot spring sediment (British Columbia, Canada)                                                                       | HGT18656.1     | 3.E-33 | 34 | Y |
| Chloroflexi bacterium isolate SpSt-600                 | Chloroflexi     | hot spring sediment (Tengchong, China)                                                                               | HGO05051.1     | 8.E-34 | 32 | Y |
| Chloroflexi bacterium isolate SpSt-660                 | Chloroflexi     | hot spring sediment (Tengchong, China)                                                                               | HGL63430.1     | 3.E-33 | 32 | Y |
| Chloroflexi bacterium isolate SpSt-996                 | Chloroflexi     | mud, sediment (Yellowstone National Park, USA)                                                                       | HFU29806.1     | 2.E-33 | 34 | Y |
| Chloroflexi bacterium isolate UBA9854                  | Chloroflexi     | anaerobic digester                                                                                                   | HAI37108.1     | 2.E-26 | 31 | Y |
| Chloroflexi bacterium isolate UTCFX4                   | Chloroflexi     | anaerobic digester filtrate from the belt filter press of CVWRF wastewater treatment plant (Salt Lake City, UT, USA) | OQY79586.1     | 2.E-23 | 31 | Y |
| Cloacibacillus evryensis strain DSM 19522              | Synergistetes   | sewage sludge (Évry, France)                                                                                         | WP_034444262.1 | 6.E-15 | 26 | N |
| Cloacibacillus porcorum strain 105753                  | Synergistetes   | pig feces                                                                                                            | NMF17534.1     | 3.E-14 | 26 | N |
| Cloacibacillus porcorum strain CL-84                   | Synergistetes   | pig cecal mucosa                                                                                                     | ANZ46032.1     | 8.E-12 | 24 | N |
| Cloacibacillus sp. strain An23                         | Synergistetes   | red junglefowl cecum                                                                                                 | OOU93278.1     | 9.E-16 | 27 | N |
| Deferribacter desulfuricans strain SSM1                | Deferribacteres | deep-sea hydrothermal vent (Suiyo Seamount, Japan)                                                                   | BAI81501.1     | 9.E-05 | 24 | Y |
| Dehalococcoidia bacterium isolate Baikal-deep-G109     | Chloroflexi     | Lake Baikal (Russia)                                                                                                 | MSQ14392.1     | 3.E-13 | 26 | N |
| Deltaproteobacteria bacterium isolate 1MN72D_58_314    | Proteobacteria  | groundwater (Munich, Germany)                                                                                        | TDB36245.1     | 2.E-12 | 28 | Y |
| Deltaproteobacteria bacterium isolate AS06rmzACSIP_532 | Proteobacteria  | anaerobic digestion of organic wastes under variable temperature conditions and feedstocks                           | NLV24503.1     | 2.E-13 | 30 | Y |
| Deltaproteobacteria bacterium isolate AS06rmzACSIP_589 | Proteobacteria  | anaerobic digestion of organic wastes under variable temperature conditions and feedstocks                           | NLX52857.1     | 3.E-38 | 35 | Y |
| Deltaproteobacteria bacterium isolate AS4AgIBPMA_32    | Proteobacteria  | anaerobic digestion of organic wastes under variable temperature conditions and feedstocks                           | NMC97429.1     | 3.E-38 | 35 | Y |
| Deltaproteobacteria bacterium isolate B3_G2            | Proteobacteria  | deep-sea hydrothermal vent sediment (Guaymas Basin, Mexico)                                                          | RLC06739.1     | 3.E-17 | 28 | Y |
| Deltaproteobacteria bacterium isolate B13_G4           | Proteobacteria  | deep-sea hydrothermal vent sediment (Guaymas Basin, Mexico)                                                          | RLC22860.1     | 2.E-24 | 30 | Y |
| Deltaproteobacteria bacterium isolate B17_G16          | Proteobacteria  | deep-sea hydrothermal vent sediment (Guaymas Basin, Mexico)                                                          | RLB37252.1     | 7.E-12 | 26 | Y |
| Deltaproteobacteria bacterium isolate B23_G16          | Proteobacteria  | deep-sea hydrothermal vent sediment (Guaymas Basin, Mexico)                                                          | RLC12904.1     | 9.E-19 | 31 | Y |

|                                                                    |                |                                                                                         |                |        |    |   |
|--------------------------------------------------------------------|----------------|-----------------------------------------------------------------------------------------|----------------|--------|----|---|
| Deltaproteobacteria bacterium isolate B46_G9                       | Proteobacteria | deep-sea hydrothermal vent sediment (Guaymas Basin, Mexico)                             | RLB18191.1     | 1.E-19 | 29 | Y |
| Deltaproteobacteria bacterium isolate B125_G9                      | Proteobacteria | deep-sea hydrothermal vent sediment (Guaymas Basin, Mexico)                             | RLC29483.1     | 6.E-19 | 26 | Y |
| Deltaproteobacteria bacterium isolate B133_G9                      | Proteobacteria | deep-sea hydrothermal vent sediment (Guaymas Basin, Mexico)                             | RLC20422.1     | 1.E-24 | 32 | N |
| Deltaproteobacteria bacterium isolate B144_G9                      | Proteobacteria | deep-sea hydrothermal vent sediment (Guaymas Basin, Mexico)                             | RLC25857.1     | 9.E-18 | 28 | Y |
| Deltaproteobacteria bacterium isolate CG_4_8_14_3_um_filter_51_11  | Proteobacteria | aquifer (Crystal Geysers, UT, USA)                                                      | PIX18886.1     | 2.E-18 | 27 | N |
| Deltaproteobacteria bacterium isolate CG03_land_8_20_14_0_80_45_14 | Proteobacteria | aquifer (Crystal Geysers, UT, USA)                                                      | PIV21324.1     | 1.E-22 | 27 | Y |
| Deltaproteobacteria bacterium isolate DOLJRAL78_50_10              | Proteobacteria | gingival sulcus from 5 year old male Dolphin_J                                          | PIE73735.1     | 7.E-21 | 31 | Y |
| Deltaproteobacteria bacterium isolate DOLJRAL78_53_22              | Proteobacteria | gingival sulcus from 5 year old male Dolphin_J                                          | PIE70991.1     | 4.E-07 | 25 | N |
| Deltaproteobacteria bacterium isolate HGW-Deltaproteobacteria-1    | Proteobacteria | groundwater (Horonobe, Japan)                                                           | PKN88290.1     | 3.E-30 | 32 | Y |
| Deltaproteobacteria bacterium isolate HGW-Deltaproteobacteria-5    | Proteobacteria | groundwater (Horonobe, Japan)                                                           | PKN10657.1     | 2.E-34 | 33 | Y |
| Deltaproteobacteria bacterium isolate HGW-Deltaproteobacteria-6    | Proteobacteria | groundwater (Horonobe, Japan)                                                           | PKN18563.1     | 3.E-36 | 35 | Y |
| Deltaproteobacteria bacterium isolate HGW-Deltaproteobacteria-11   | Proteobacteria | groundwater (Horonobe, Japan)                                                           | PKN59704.1     | 2.E-33 | 33 | Y |
| Deltaproteobacteria bacterium isolate HGW-Deltaproteobacteria-19   | Proteobacteria | groundwater (Horonobe, Japan)                                                           | PKN34680.1     | 1.E-21 | 32 | Y |
| Deltaproteobacteria bacterium isolate INTA.AUR.1003                | Proteobacteria | first pond of the AUR serial dairy industry stabilization pond system (Vila, Argentina) | NCC25723.1     | 1.E-14 | 28 | Y |
| Deltaproteobacteria bacterium isolate J040                         | Proteobacteria | iron-rich hot spring (Shikinejima Island, Japan)                                        | RMG60923.1     | 1.E-23 | 31 | N |
| Deltaproteobacteria bacterium isolate MAG 48                       | Proteobacteria | hydrothermal vent (Pacific Ocean)                                                       | RTZ96695.1     | 3.E-15 | 27 | Y |
| Deltaproteobacteria bacterium isolate RIFOXYC2_FULL_48_10          | Proteobacteria | Rifle well CD01 (Rifle, CO, USA)                                                        | OGQ92707.1     | 3.E-22 | 29 | Y |
| Deltaproteobacteria bacterium isolate SpSt-510                     | Proteobacteria | hot spring sediment (British Columbia, Canada)                                          | HFH11051.1     | 2.E-20 | 30 | Y |
| Deltaproteobacteria bacterium isolate SpSt-772                     | Proteobacteria | mud, sediment (Yellowstone National Park, USA)                                          | HGV81120.1     | 2.E-16 | 27 | Y |
| Deltaproteobacteria bacterium isolate SpSt-871                     | Proteobacteria | mud, sediment (Yellowstone National Park, USA)                                          | HGZ73194.1     | 7.E-16 | 27 | Y |
| Deltaproteobacteria bacterium isolate SpSt-1015                    | Proteobacteria | mud, sediment (Yellowstone National Park, USA)                                          | HHH87581.1     | 9.E-20 | 30 | Y |
| Deltaproteobacteria bacterium isolate UBA10529                     | Proteobacteria | oil sands and coal beds                                                                 | HAR96709.1     | 2.E-15 | 28 | Y |
| Desulfamplus magnetovallimortis strain BW-1                        | Proteobacteria | brackish spring (Death Valley, CA, USA)                                                 | SLM31755.1     | 7.E-20 | 25 | Y |
| Desulfatibacillum aliphaticivorans strain AK-01                    | Proteobacteria | Arthur Kill, NJ/NY waterway (USA)                                                       | ACL02166.1     | 5.E-19 | 33 | N |
| Desulfatibacillum aliphaticivorans strain DSM 15576                | Proteobacteria | hydrocarbon-polluted marine sediment (Gulf of Fos, France)                              | WP_051327074.1 | 5.E-20 | 34 | N |



|                                                   |                |                                                                                                          |                |        |    |   |
|---------------------------------------------------|----------------|----------------------------------------------------------------------------------------------------------|----------------|--------|----|---|
| Desulfatibacillum alkenivorans strain DSM 16219   | Proteobacteria | oil-polluted sediment of operation station of ballast water and tank water cleaning (Fos Harbor, France) | WP_083611154.1 | 1.E-17 | 32 | N |
| Desulfatiglans anilini strain DSM 4660            | Proteobacteria | marine sediment (North Sea coast, Germany)                                                               | WP_028322618.1 | 1.E-22 | 31 | N |
| Desulfatitalea sp. isolate Site_C24               | Proteobacteria | beach sand (Middle Park Beach, Australia)                                                                | NNK02546.1     | 1.E-12 | 28 | Y |
| Desulfatitalea tepidiphila strain S28bF           | Proteobacteria | marine sediment (Tokyo Bay, Japan)                                                                       | WP_076750459.1 | 2.E-23 | 30 | Y |
| Desulfobacter curvatus strain DSM 3379            | Proteobacteria | marine mud (Venice, Italy)                                                                               | WP_020586554.1 | 2.E-20 | 30 | Y |
| Desulfobacter hydrogenophilus strain AcRS1        | Proteobacteria | marine mud (Venice, Italy)                                                                               | QBH12555.1     | 8.E-15 | 27 | Y |
| Desulfobacter postgatei strain 2ac9               | Proteobacteria | anaerobic sediment of brackish water ditch (Jadebusen, Germany)                                          | EIM62640.1     | 1.E-21 | 30 | Y |
| Desulfobacter sp. isolate UBA12168                | Proteobacteria | sediment                                                                                                 | HBT90065.1     | 2.E-21 | 30 | Y |
| Desulfobacter vibrioformis strain DSM 8776        | Proteobacteria | water-oil separation system on oil platform (North Sea, Norway)                                          | WP_035235263.1 | 4.E-18 | 29 | Y |
| Desulfobacteraceae bacterium isolate 4484_190.3   | Proteobacteria | deep-sea hydrothermal vent sediment (Guaymas Basin, Mexico)                                              | OPX36574.1     | 8.E-19 | 28 | Y |
| Desulfobacteraceae bacterium isolate 4572_88      | Proteobacteria | deep-sea hydrothermal vent sediment (Guaymas Basin, Mexico)                                              | OQY55368.1     | 3.E-20 | 31 | N |
| Desulfobacteraceae bacterium isolate 4572_123     | Proteobacteria | deep-sea hydrothermal vent sediment (Guaymas Basin, Mexico)                                              | OQY04121.1     | 5.E-26 | 30 | Y |
| Desulfobacteraceae bacterium isolate CG2_30_51_40 | Proteobacteria | groundwater (Crystal Geyser, UT, USA)                                                                    | OIP43152.1     | 2.E-18 | 27 | N |
| Desulfobacteraceae bacterium isolate DS_bin_10    | Proteobacteria | beach sand (Middle Park Beach, Australia)                                                                | NNG02102.1     | 2.E-12 | 25 | Y |
| Desulfobacteraceae bacterium isolate Eth-SRB1     | Proteobacteria | anaerobic ethane-degrading enrichment culture inoculated with marine sediment (Gulf of Mexico)           | RZB29647.1     | 5.E-18 | 27 | Y |
| Desulfobacteraceae bacterium isolate Eth-SRB2     | Proteobacteria | anaerobic ethane-degrading enrichment culture inoculated with marine sediment (Gulf of Mexico)           | RZB36540.1     | 3.E-25 | 30 | Y |
| Desulfobacteraceae bacterium isolate HyVt-13      | Proteobacteria | deep-sea hydrothermal vent sediment (Guaymas Basin, Mexico)                                              | HDI59857.1     | 1.E-10 | 29 | N |
| Desulfobacteraceae bacterium isolate HyVt-208     | Proteobacteria | deep-sea hydrothermal vent sediment (Guaymas Basin, Mexico)                                              | HDL07956.1     | 2.E-22 | 28 | Y |
| Desulfobacteraceae bacterium isolate IS3          | Proteobacteria | microbial mat in sulfidic groundwater-fed sinkhole (Lake Huron, USA)                                     | OQX21718.1     | 1.E-23 | 27 | N |
| Desulfobacteraceae bacterium isolate IS3          | Proteobacteria | microbial mat in sulfidic groundwater-fed sinkhole (Lake Huron, USA)                                     | OQW99265.1     | 2.E-19 | 30 | Y |
| Desulfobacteraceae bacterium isolate IS3          | Proteobacteria | microbial mat in sulfidic groundwater-fed sinkhole (Lake Huron, USA)                                     | OQX26173.1     | 2.E-18 | 30 | Y |
| Desulfobacteraceae bacterium isolate Madre2       | Proteobacteria | bioplastic (PHA) biofilm from water-sediment interface of coastal lagoon (Upper Laguna Madre, TX, USA)   | THB81596.1     | 3.E-17 | 27 | Y |
| Desulfobacteraceae bacterium isolate SURF_4       | Proteobacteria | deeply circulating subsurface aquifer fluids (Lead, SD, USA)                                             | RJQ76849.1     | 7.E-11 | 26 | Y |
| Desulfobacteraceae bacterium isolate SURF_4       | Proteobacteria | deeply circulating subsurface aquifer fluids (Lead, SD, USA)                                             | RJQ65780.1     | 2.E-05 | 21 | N |

|                                                     |                |                                                                                        |            |        |    |   |
|-----------------------------------------------------|----------------|----------------------------------------------------------------------------------------|------------|--------|----|---|
| Desulfobacteraceae bacterium isolate SURF_7         | Proteobacteria | deeply circulating subsurface aquifer fluids (Lead, SD, USA)                           | RJP79134.1 | 6.E-21 | 29 | Y |
| Desulfobacteraceae bacterium isolate UBA8212        | Proteobacteria | seawater                                                                               | HCY85389.1 | 9.E-14 | 28 | Y |
| Desulfobacteraceae bacterium isolate UBA8400        | Proteobacteria | microbial mat (Lake Huron, MI, USA)                                                    | HAO21021.1 | 5.E-27 | 27 | N |
| Desulfobacteriales bacterium isolate DOLJRAL78_48_6 | Proteobacteria | gingival sulcus from 5 year old male Dolphin_J                                         | PIE60952.1 | 7.E-18 | 28 | Y |
| Desulfobacteriales bacterium isolate GLR701         | Proteobacteria | Glendhu Ridge methane seep (Pacific Ocean)                                             | NOQ19417.1 | 9.E-24 | 30 | N |
| Desulfobacteriales bacterium isolate HyVt-57        | Proteobacteria | deep-sea hydrothermal vent sediment (Guaymas Basin, Mexico)                            | HGY11719.1 | 1.E-17 | 28 | Y |
| Desulfobacteriales bacterium isolate HyVt-57        | Proteobacteria | deep-sea hydrothermal vent sediment (Guaymas Basin, Mexico)                            | HGY11834.1 | 4.E-15 | 28 | Y |
| Desulfobacteriales bacterium isolate HyVt-59        | Proteobacteria | deep-sea hydrothermal vent sediment (Guaymas Basin, Mexico)                            | HHC24326.1 | 1.E-23 | 32 | Y |
| Desulfobacteriales bacterium isolate S7086C20       | Proteobacteria | methane seep sediment (Pacific Ocean)                                                  | OEU45016.1 | 4.E-24 | 31 | Y |
| Desulfobacteriales bacterium isolate Site_B14       | Proteobacteria | beach sand (Middle Park Beach, Australia)                                              | NNK84523.1 | 2.E-23 | 29 | Y |
| Desulfobacteriales bacterium isolate SpSt-563       | Proteobacteria | hot spring sediment (British Columbia, Canada)                                         | HGP66397.1 | 6.E-19 | 30 | Y |
| Desulfobacteriales bacterium isolate UWMA-0216      | Proteobacteria | Mid-Cayman Rise vent fluids (Atlantic Ocean)                                           | HID59813.1 | 2.E-15 | 26 | Y |
| Desulfobacterium autotrophicum strain HRM2          | Proteobacteria | marine sediment (Mediterranean Sea)                                                    | ACN17620.1 | 3.E-19 | 30 | Y |
| Desulfobacterium vacuolatum strain DSM 3385         | Proteobacteria | marine mud (Venice, Italy)                                                             | SMC85487.1 | 7.E-17 | 29 | Y |
| Desulfobacula phenolica strain DSM 3384             | Proteobacteria | marine mud (Venice, Italy)                                                             | SDU45768.1 | 3.E-16 | 26 | Y |
| Desulfobacula sp. isolate GWF2_41_7                 | Proteobacteria | Rifle well CD01 (Rifle, CO, USA)                                                       | OGR15363.1 | 5.E-19 | 27 | Y |
| Desulfobacula sp. isolate SM1_1_2                   | Proteobacteria | stromatolite mat (Schoenmakerskop, South Africa)                                       | NJM02770.1 | 1.E-17 | 28 | N |
| Desulfobacula toluolica strain Tol2                 | Proteobacteria | marine mud (Woods Hole, MA, USA)                                                       | CCK82146.1 | 2.E-15 | 26 | Y |
| Desulfobulbaceae bacterium isolate DB1              | Proteobacteria | anode biofilm in microbial fuel cells                                                  | OKY74567.1 | 6.E-05 | 27 | Y |
| Desulfobulbus oralis strain HOTO41/ORNL             | Proteobacteria | human subgingival sample                                                               | AVD70372.1 | 2.E-57 | 37 | Y |
| Desulfobulbus oralis strain HOTO41/ORNL             | Proteobacteria | human subgingival sample                                                               | AVD71509.1 | 1.E-61 | 40 | Y |
| Desulfococcus multivorans strain DSM 2059           | Proteobacteria | sewage digester (Göttingen, Germany)                                                   | EPR35993.1 | 2.E-19 | 32 | Y |
| Desulfococcus sp. isolate 4484_241                  | Proteobacteria | deep-sea hydrothermal vent sediment (Guaymas Basin, Mexico)                            | OQX63297.1 | 3.E-20 | 29 | N |
| Desulfococcus sp. isolate 4484_242                  | Proteobacteria | deep-sea hydrothermal vent sediment (Guaymas Basin, Mexico)                            | OQX61744.1 | 2.E-16 | 28 | N |
| Desulfoluna spongiiphila strain AA1                 | Proteobacteria | marine sponge Aplysina aerophoba (Mediterranean Sea)                                   | SCX79058.1 | 2.E-06 | 27 | N |
| Desulfoluna spongiiphila strain DBB                 | Proteobacteria | marine intertidal sediment (L'Escala, Spain)                                           | VVS90461.1 | 8.E-06 | 26 | N |
| Desulfomonile tiedjei isolate SpSt-769              | Proteobacteria | mud, sediment (Yellowstone National Park, USA)                                         | HGH61094.1 | 5.E-28 | 32 | Y |
| Desulfomonile tiedjei strain DSM 6799               | Proteobacteria | sewage sludge (Adrian, MI, USA)                                                        | AFM25414.1 | 1.E-36 | 35 | Y |
| Desulfonatronospira thiodismutans strain ASO3-1     | Proteobacteria | sediment from a highly alkaline saline soda lake on the Kulunda Steppe (Altai, Russia) | EFI33801.1 | 1.E-22 | 33 | Y |
| Desulfonema ishimotonii strain Tokyo 01             | Proteobacteria | marine sediment (Tokyo Bay, Japan)                                                     | GBC64034.1 | 3.E-21 | 30 | N |

|                                                     |                 |                                                                                            |                |        |    |   |
|-----------------------------------------------------|-----------------|--------------------------------------------------------------------------------------------|----------------|--------|----|---|
| Desulfosarcina alkanivorans strain PL12             | Proteobacteria  | oil spill of shallow marine sediment (Shuaiba, Kuwait)                                     | BBO72287.1     | 2.E-19 | 30 | Y |
| Desulfosarcina cetonica strain JCM 12296            | Proteobacteria  | flooded oil stratum of the Apsheron peninsula (Azerbaijan)                                 | WP_054702774.1 | 2.E-13 | 28 | N |
| Desulfosarcina ovata subsp. sediminis strain 28bB2T | Proteobacteria  | tidal flat sediment (Tokyo Bay, Japan)                                                     | BBO80496.1     | 3.E-11 | 27 | Y |
| Desulfosarcina sp. strain BuS5                      | Proteobacteria  | sediment (Guaymas Basin, Mexico)                                                           | WP_027353905.1 | 9.E-15 | 25 | Y |
| Desulfosarcina widdellii strain PP31                | Proteobacteria  | oil spill of shallow marine sediment (Shuaiba, Kuwait)                                     | BBO74481.1     | 8.E-15 | 26 | Y |
| Desulfospira joergensenii strain DSM 10085          | Proteobacteria  | marine surface sediment below sea grass (Arcachon Bay, France)                             | WP_022666032.1 | 2.E-19 | 28 | Y |
| Desulfotignum balticum strain DSM 7044              | Proteobacteria  | marine mud (Saxild, Denmark)                                                               | WP_024336727.1 | 6.E-23 | 32 | Y |
| Desulfotignum phosphitoxidans strain DSM 13687      | Proteobacteria  | marine sediment (Venice, Italy)                                                            | EMS79033.1     | 3.E-23 | 32 | Y |
| Desulfovibrio sp. strain An276                      | Proteobacteria  | red junglefowl cecum                                                                       | OOU52973.1     | 3.E-60 | 35 | Y |
| Desulfovibrionaceae bacterium isolate CIM:MAG 1040  | Proteobacteria  | human feces                                                                                | PWM70546.1     | 1.E-65 | 41 | Y |
| Desulfurispirillum indicum strain S5                | Chrysiogenetes  | river sediment (Chennai, India)                                                            | ADU66823.1     | 1.E-04 | 26 | Y |
| Desulfurivibrio sp. isolate SURF_16                 | Proteobacteria  | deeply circulating subsurface aquifer fluids (Lead, SD, USA)                               | RJX31147.1     | 8.E-11 | 28 | Y |
| Desulfuromonadales bacterium isolate C00003093      | Proteobacteria  | sediment from site of active methane seepage at Hydrate Ridge South (Pacific Ocean)        | OEU75150.1     | 2.E-18 | 28 | Y |
| Fibrobacter sp. isolate AS06rmzACSIP_199            | Fibrobacteres   | anaerobic digestion of organic wastes under variable temperature conditions and feedstocks | NLG16780.1     | 3.E-22 | 29 | Y |
| Fibrobacter sp. isolate AS06rmzACSIP_529            | Fibrobacteres   | anaerobic digestion of organic wastes under variable temperature conditions and feedstocks | NLD91845.1     | 1.E-21 | 27 | N |
| Fibrobacter sp. isolate AS06rmzACSIP_543            | Fibrobacteres   | anaerobic digestion of organic wastes under variable temperature conditions and feedstocks | NLE01532.1     | 7.E-21 | 30 | Y |
| Fibrobacter sp. isolate AS09scLD_71                 | Fibrobacteres   | anaerobic digestion of organic wastes under variable temperature conditions and feedstocks | NLP03213.1     | 2.E-22 | 30 | Y |
| Fibrobacter sp. isolate AS22ysBPME_152              | Fibrobacteres   | anaerobic digestion of organic wastes under variable temperature conditions and feedstocks | NLL13864.1     | 3.E-20 | 27 | Y |
| Fibrobacteres bacterium isolate UBA10882            | Fibrobacteres   | wetland surface sediment                                                                   | HAI80221.1     | 6.E-20 | 30 | Y |
| Firmicutes bacterium isolate AS23ysBPME_266         | Firmicutes      | anaerobic digestion of organic wastes under variable temperature conditions and feedstocks | NMB11274.1     | 4.E-06 | 25 | N |
| Flexilinea flocculi strain TC1                      | Chloroflexi     | methanogenic granular sludge (Belgium)                                                     | GAP39404.1     | 5.E-43 | 34 | Y |
| Fretibacterium sp. isolate AS21ysBPME_7             | Synergistetes   | anaerobic digestion of organic wastes under variable temperature conditions and feedstocks | NLL37650.1     | 1.E-16 | 32 | N |
| Geovibrio thiophilus strain DSM 11263               | Deferribacteres | drainage ditch (Konstanz, Germany)                                                         | QAR33452.1     | 4.E-08 | 28 | Y |
| Ignavibacteriae bacterium isolate B3_G1             | Chlorobi        | deep-sea hydrothermal vent sediment (Guaymas Basin, Mexico)                                | RKY90554.1     | 4.E-22 | 29 | Y |
| Lentimonas sp. CC4                                  | Verrucomicrobia | seawater (Nahant, MA, USA)                                                                 | CAA6679502.1   | 1.E-15 | 30 | Y |
| Lentimonas sp. CC10                                 | Verrucomicrobia | seawater (Nahant, MA, USA)                                                                 | CAA6691588.1   | 3.E-15 | 29 | Y |

|                                                   |                |                                                                                                     |              |        |    |   |
|---------------------------------------------------|----------------|-----------------------------------------------------------------------------------------------------|--------------|--------|----|---|
| Lentisphaerae bacterium isolate AS06rmzACSIP_375  | Lentisphaerae  | anaerobic digestion of organic wastes under variable temperature conditions and feedstocks          | NLE68485.1   | 5.E-15 | 29 | Y |
| Lentisphaerae bacterium isolate RIFOXYA12_64_32   | Lentisphaerae  | Rifle well CD01 (Rifle, CO, USA)                                                                    | OGV62430.1   | 2.E-28 | 33 | Y |
| Leptolinea sp. isolate AS06rmzACSIP_266           | Chloroflexi    | anaerobic digestion of organic wastes under variable temperature conditions and feedstocks          | NLF50870.1   | 2.E-41 | 35 | Y |
| Leptolinea sp. isolate AS27yjCOA_114              | Chloroflexi    | anaerobic digestion of organic wastes under variable temperature conditions and feedstocks          | NMB53094.1   | 2.E-36 | 34 | Y |
| Leptolinea tardivitalis strain YMTK-2             | Chloroflexi    | wastewater from a factory producing shochu (Yamagawa Beach, Japan)                                  | KPL70500.1   | 2.E-38 | 33 | Y |
| Levilinea saccharolytica strain KIBI-1            | Chloroflexi    | sludge granules from sugar-processing plant (Niigata, Japan)                                        | KPL75587.1   | 3.E-35 | 35 | Y |
| Nitrolancea hollandica strain Lb                  | Chloroflexi    | nitrifying bioreactor (Rotterdam, Netherlands)                                                      | CCF84771.1   | 8.E-06 | 24 | N |
| Nitrospira moscoviensis strain NSP M-1            | Nitrospirae    | eroded iron pipe (Moscow, Russia)                                                                   | ALA58029.1   | 2.E-16 | 29 | Y |
| Olavius algarvensis Delta 1 endosymbiont          | Proteobacteria | shallow marine sediment (Italy)                                                                     | CAB1077770.1 | 1.E-21 | 29 | Y |
| Olavius sp. associated proteobacterium Delta 1    | Proteobacteria | shallow marine sediment (Italy)                                                                     | CAB1061238.1 | 6.E-20 | 28 | Y |
| Ornatilinea apprima strain P3M-1                  | Chloroflexi    | microbial mat formed in wooden bath filled with hot water from a 2775 m-deep well (Siberia, Russia) | KPL78704.1   | 1.E-20 | 33 | Y |
| Pelodictyon luteolum strain DSM 273               | Chlorobi       | meromictic lake (Norway)                                                                            | ABB23996.1   | 2.E-15 | 29 | Y |
| Pelodictyon phaeoclathratiforme strain BU-1       | Chlorobi       | monimolimnion of Buchensee (Germany)                                                                | ACF43535.1   | 1.E-22 | 32 | Y |
| Pelolinea submarina strain DSM 23923              | Chloroflexi    | marine subsurface sediment (Pacific Ocean)                                                          | BBB47806.1   | 2.E-35 | 32 | Y |
| Planctomycetes bacterium isolate GSL.Bin20        | Planctomycetes | microbial mat (Bridger Bay, UT, USA)                                                                | NBB94753.1   | 5.E-22 | 30 | Y |
| Prosthecochloris aestuarii isolate SpSt-1181      | Chlorobi       | hot spring sediment (Wilbur Springs, CA, USA)                                                       | HED30548.1   | 2.E-28 | 36 | Y |
| Prosthecochloris aestuarii strain DSM 271         | Chlorobi       | hydrogen sulfide containing mud of brackish lagoon (Lake Sasyk-Sivash, Russia)                      | ACF46288.1   | 2.E-20 | 30 | N |
| Prosthecochloris marina strain V1                 | Chlorobi       | coastal area of the South China Sea                                                                 | PWW83239.1   | 5.E-23 | 31 | N |
| Prosthecochloris sp. isolate C10                  | Chlorobi       | seawater lake chemocline (Dragon's Eye Lake, Croatia)                                               | NEX14508.1   | 3.E-17 | 28 | N |
| Prosthecochloris sp. strain CIB 2401              | Chlorobi       | coastal lagoon (Mallorca, Spain)                                                                    | ANT65030.1   | 2.E-26 | 34 | Y |
| Prosthecochloris sp. strain GSB1                  | Chlorobi       | deep-sea hydrothermal vent (Pacific Ocean)                                                          | ASQ91644.1   | 2.E-26 | 33 | N |
| Prosthecochloris sp. strain HL-130-GSB            | Chlorobi       | phototrophic microbial mat (Hot Lake, WA, USA)                                                      | ARM30833.1   | 5.E-28 | 36 | Y |
| Prosthecochloris sp. strain ZM_2                  | Chlorobi       | water from chemokine of meromictic lakes Green cape (Karelia, Russia)                               | RNA64855.1   | 8.E-24 | 34 | Y |
| Prosthecochloris vibrioformis strain DSM 260      | Chlorobi       | rivermouth                                                                                          | TNJ36903.1   | 9.E-27 | 34 | Y |
| Proteobacteria bacterium isolate DOLZORAL124_55_4 | Proteobacteria | gingival sulcus from 29 year old lactating female Dolphin_Z                                         | PID40410.1   | 2.E-14 | 28 | Y |
| Proteobacteria bacterium isolate SpSt-1152        | Proteobacteria | hot spring sediment (Wilbur Springs, CA, USA)                                                       | HEC99630.1   | 2.E-15 | 28 | Y |
| Pseudodesulfovibrio sp. strain S3                 | Proteobacteria | Black Sea water (Bulgaria)                                                                          | RWU02434.1   | 2.E-06 | 26 | Y |
| Smithella sp. isolate AS06rmzACSIP_551            | Proteobacteria | anaerobic digestion of organic wastes under variable temperature conditions and feedstocks          | NLD79966.1   | 2.E-35 | 33 | Y |

|                                                   |                |                                                                                             |            |        |    |   |
|---------------------------------------------------|----------------|---------------------------------------------------------------------------------------------|------------|--------|----|---|
| Smithella sp. isolate AS17jrsBPGN_1               | Proteobacteria | anaerobic digestion of organic wastes under variable temperature conditions and feedstocks  | NLA41131.1 | 1.E-32 | 33 | Y |
| Smithella sp. isolate AS4AgIBPMA_11               | Proteobacteria | anaerobic digestion of organic wastes under variable temperature conditions and feedstocks  | NMC92510.1 | 5.E-35 | 34 | Y |
| Smithella sp. isolate D17                         | Proteobacteria | produced water from an oilfield (Medicine Hat, Alberta, Canada)                             | KFZ45035.1 | 2.E-36 | 34 | Y |
| Smithella sp. isolate F21                         | Proteobacteria | oil sands tailings pond (Medicine Hat, Alberta, Canada)                                     | KFN39154.1 | 7.E-36 | 34 | Y |
| Smithella sp. isolate SCADC                       | Proteobacteria | mature fine tailings from oil sands tailings pond (Medicine Hat, Alberta, Canada)           | KFO68937.1 | 3.E-37 | 35 | Y |
| Smithella sp. isolate SDB                         | Proteobacteria | sediment (San Diego Bay, CA, USA)                                                           | KQC09736.1 | 6.E-33 | 33 | Y |
| Smithella sp. isolate UBA10513                    | Proteobacteria | oil sands and coal beds                                                                     | HBI47682.1 | 1.E-38 | 34 | Y |
| Sphaerobacter thermophilus strain DSM 20745       | Chloroflexi    | thermal treated municipal sewage sludge (Muenchen-Grosslappen, Germany)                     | ACZ37929.1 | 9.E-07 | 28 | N |
| Sphaerochaeta dissipatitropha strain GLS2         | Spirochaetes   | arctic permafrost (Russia)                                                                  | SMP46469.1 | 1.E-21 | 31 | Y |
| Sphaerochaeta globosa strain Buddy                | Spirochaetes   | marine hot spring (Shiashkoten Island, Russia)                                              | ADY12711.1 | 8.E-22 | 30 | Y |
| Sphaerochaeta halotolerans strain 4-11            | Spirochaetes   | Production water from oilfield (Vostochno-Anzirscoe oilfield, Russia)                       | RFU94749.1 | 1.E-17 | 31 | Y |
| Sphaerochaeta pleomorpha strain Grapes            | Spirochaetes   | Red Cedar River (Okemos, MI, USA)                                                           | AEV28959.1 | 1.E-18 | 30 | Y |
| Sphaerochaeta sp. isolate MAG5                    | Spirochaetes   | Red-pigmented microbial biofilm developed on the inner wall of a bioreactor (Jena, Germany) | TAH57281.1 | 2.E-17 | 30 | Y |
| Sphaerochaeta sp. isolate UBA8956                 | Spirochaetes   | oil sands and coal beds                                                                     | HAF86241.1 | 4.E-12 | 26 | Y |
| Sphaerochaeta sp. isolate UBA9948                 | Spirochaetes   | oil sands and coal beds                                                                     | HAP57835.1 | 9.E-20 | 31 | Y |
| Sphaerochaeta sp. isolate UBA11053                | Spirochaetes   | bioreactor                                                                                  | HCU30833.1 | 2.E-17 | 30 | Y |
| Sphaerochaeta sp. isolate UBA11175                | Spirochaetes   | oil sands and coal beds                                                                     | HBO36282.1 | 7.E-20 | 31 | Y |
| Spirochaetales bacterium isolate AS06rmzACSIP_457 | Spirochaetes   | anaerobic digestion of organic wastes under variable temperature conditions and feedstocks  | NLE15601.1 | 7.E-20 | 30 | Y |
| Spirochaetales bacterium isolate AS07pgkLD_77     | Spirochaetes   | anaerobic digestion of organic wastes under variable temperature conditions and feedstocks  | NLY07479.1 | 1.E-14 | 30 | Y |
| Spirochaetales bacterium isolate AS08sgBPME_324   | Spirochaetes   | anaerobic digestion of organic wastes under variable temperature conditions and feedstocks  | HHT81641.1 | 2.E-17 | 29 | Y |
| Spirochaetales bacterium isolate AS10tIH2TH_379   | Spirochaetes   | anaerobic digestion of organic wastes under variable temperature conditions and feedstocks  | NLA97632.1 | 2.E-20 | 30 | Y |
| Spirochaetales bacterium isolate AS22ysBPME_10    | Spirochaetes   | anaerobic digestion of organic wastes under variable temperature conditions and feedstocks  | NLL25178.1 | 4.E-17 | 29 | Y |
| Spirochaetales bacterium isolate AS22ysBPME_249   | Spirochaetes   | anaerobic digestion of organic wastes under variable temperature conditions and feedstocks  | NMA22686.1 | 3.E-15 | 30 | Y |
| Spirochaetales bacterium isolate AS23ysBPME_118   | Spirochaetes   | anaerobic digestion of organic wastes under variable temperature conditions and feedstocks  | NLK13860.1 | 8.E-18 | 29 | Y |
| Spirochaetales bacterium isolate AS23ysBPME_120   | Spirochaetes   | anaerobic digestion of organic wastes under variable temperature conditions and feedstocks  | NLK06812.1 | 1.E-15 | 29 | Y |
| Spirochaetes bacterium isolate ADurb.Bin315       | Spirochaetes   | anaerobic digester (Urbana, IL, USA)                                                        | OQA43369.1 | 4.E-16 | 28 | Y |

|                                                      |                 |                                                                                                   |            |        |    |   |
|------------------------------------------------------|-----------------|---------------------------------------------------------------------------------------------------|------------|--------|----|---|
| Spirochaetes bacterium strain RBG_16_49_21           | Spirochaetes    | Rifle well D04 (Rifle, CO, USA)                                                                   | OHD69784.1 | 2.E-12 | 27 | N |
| Spirochaetia bacterium isolate INTA.CYC.017          | Spirochaetes    | first pond of the CYC serial dairy industry stabilization pond system (San Carlos Sur, Argentina) | NCC13313.1 | 4.E-17 | 28 | Y |
| Spirochaetia bacterium isolate UBA12135              | Spirochaetes    | aquifer (Colorado River, CO, USA)                                                                 | HBE03855.1 | 4.E-05 | 24 | Y |
| Synergistaceae bacterium isolate AS07pgkLD_87        | Synergistetes   | anaerobic digestion of organic wastes under variable temperature conditions and feedstocks        | NLV82264.1 | 5.E-11 | 26 | N |
| Synergistes sp. strain 3_1_syn1                      | Synergistetes   | human gut                                                                                         | EHL68284.1 | 7.E-15 | 26 | N |
| Synergistetes bacterium isolate HGW-Synergistetes-1  | Synergistetes   | groundwater (Horonobe, Japan)                                                                     | PKL03800.1 | 4.E-08 | 25 | N |
| Syntrophaceae bacterium isolate UBA10514             | Proteobacteria  | oil sands and coal beds                                                                           | HBH86494.1 | 7.E-19 | 30 | Y |
| Syntrophaceae bacterium isolate UBA11395             | Proteobacteria  | oil sands and coal beds                                                                           | HBJ74262.1 | 3.E-38 | 35 | Y |
| Syntrophobacter sp. strain SbD1                      | Proteobacteria  | peat soil (Weißenstadter Forst-Nord, Germany)                                                     | SPF48485.1 | 2.E-24 | 34 | Y |
| Syntrophus sp. isolate UBA8958                       | Proteobacteria  | oil sands and coal beds                                                                           | HAI26831.1 | 1.E-21 | 32 | Y |
| Syntrophus sp. isolate UBA10520                      | Proteobacteria  | oil sands and coal beds                                                                           | HAR97668.1 | 2.E-18 | 31 | Y |
| Thermaerobacter sp. strain PB12/4term                | Firmicutes      | Sediment (Lake Baikal, Russia)                                                                    | QIA27848.1 | 4.E-04 | 28 | N |
| uncultured Desulfatiglans sp. isolate IK1            | Proteobacteria  | asphalt lake (Pitch Lake, Trinidad and Tobago)                                                    | VBB43204.1 | 3.E-19 | 32 | N |
| uncultured Desulfobacteraceae bacterium isolate CR-1 | Proteobacteria  | ectosymbiote of a magnetic protist of Mediterranean sea                                           | VEN73776.1 | 2.E-15 | 28 | Y |
| Uncultured Desulfobacterium sp.                      | Proteobacteria  | contaminated aquifer (Stuttgart, Germany)                                                         | CBX28553.1 | 2.E-24 | 30 | N |
| Verrucomicrobia bacterium isolate DP16D_bin.41       | Verrucomicrobia | groundwater (Oak Ridge, TN, USA)                                                                  | TAN38092.1 | 4.E-22 | 29 | Y |

**Table S2. Biochemically and structurally characterized members of AP endonuclease 2 superfamily**

| Enzyme                          | Organism                                                                    | Accession number | References                                                                                                                                                                                                                               |
|---------------------------------|-----------------------------------------------------------------------------|------------------|------------------------------------------------------------------------------------------------------------------------------------------------------------------------------------------------------------------------------------------|
| Endonuclease IV                 | <i>Bacillus subtilis</i> subsp. <i>subtilis</i> str. 168                    | P54476.1         | Salas-Pacheco JM, Urtiz-Estrada N, Martinez-Cadena G, Yasbin RE, & Pedraza-Reyes M (2003) <i>J Bacteriol</i> 185(18):5380-5390                                                                                                           |
| Endonuclease IV                 | <i>Chlamydia pneumoniae</i> AR39                                            | AAF37910.1       | Liu X & Liu J (2005) <i>Biochim Biophys Acta</i> 1753(2):217-225                                                                                                                                                                         |
| Endonuclease IV                 | <i>Escherichia coli</i> str. K-12 substr. MG1655                            | AAC75220.1       | Hosfield DJ, Guan Y, Haas BJ, Cunningham RP, & Tainer JA (1999) <i>Cell</i> 98(3):397-408; Ishchenko AA, Ide H, Ramotar D, Nevinsky G, & Saparbaev M (2004) <i>Biochemistry</i> 43(48):15210-15216                                       |
| Endonuclease IV                 | <i>Geobacillus kaustophilus</i> HTA426                                      | BAD76759.1       | Asano R, et al. (2011) <i>Acta Crystallogr D Biol Crystallogr</i> 67(Pt 3):149-155                                                                                                                                                       |
| Endonuclease IV                 | <i>Mycobacterium tuberculosis</i> H37Rv                                     | NP_215184.1      | Zhang W, et al. (2018) <i>Biochem Biophys Res Commun</i> 498(1):111-118; Puri RV, Singh N, Gupta RK, & Tyagi AK (2013) <i>PLoS One</i> 8(8):e71535                                                                                       |
| Endonuclease IV                 | <i>Mycoplasma genitalium</i> G37                                            | AAC71456.1       | Estevão S, van der Spek PE, van Rossum AMC, & Vink C (2014) <i>Microbiology</i> 160(Pt 6):1087-1100                                                                                                                                      |
| Endonuclease IV                 | <i>Mycoplasma pneumoniae</i> M129                                           | AAB96156.1       | Estevão S, van der Spek PE, van Rossum AMC, & Vink C (2014) <i>Microbiology</i> 160(Pt 6):1087-1100                                                                                                                                      |
| Endonuclease IV                 | <i>Pyrobaculum aerophilum</i> str. IM2                                      | AAL64792.1       | Sartori AA & Jiricny J (2003) <i>J Biol Chem</i> 278(27):24563-24576                                                                                                                                                                     |
| Endonuclease IV                 | <i>Pyrococcus furiosus</i> DSM 3638                                         | AAL80382.1       | Kiyonari S, et al. (2009) <i>Nucleic Acids Res</i> 37(19):6439-6453                                                                                                                                                                      |
| Endonuclease IV                 | <i>Sulfolobus islandicus</i> REY15A                                         | ADX86710.1       | Yan Z, Huang Q, Ni J, & Shen Y (2016) <i>Extremophiles</i> 20(5):785-793                                                                                                                                                                 |
| Endonuclease IV                 | <i>Thermococcus eurythermalis</i> A501                                      | AIU69743.1       | Wang WW, et al. (2018) <i>Int J Mol Sci</i> 20(1)                                                                                                                                                                                        |
| Endonuclease IV                 | <i>Thermotoga maritima</i> MSB8                                             | Q9WYJ7.1         | Tomaniček SJ, Hughes RC, Ng JD, & Coates L (2010) <i>Acta Crystallogr Sect F Struct Biol Cryst Commun</i> 66(Pt 9):1003-1012; Haas BJ, Sandigursky M, Tainer JA, Franklin WA, & Cunningham RP (1999) <i>J Bacteriol</i> 181(9):2834-2839 |
| Endonuclease IV                 | <i>Thermus thermophilus</i> HB8                                             | BAD70657.1       | Asano R, et al. (2011) <i>Acta Crystallogr D Biol Crystallogr</i> 67(Pt 3):149-155; Back JH, Chung JH, Park JH, & Han YS (2006) <i>Biochem Biophys Res Commun</i> 346(3):889-895                                                         |
| Endonuclease IV                 | <i>Vibrio cholerae</i> C6706                                                | OFJ21245.1       | Davies BW, et al. (2011) <i>PLoS Pathog</i> 7(2):e1001295                                                                                                                                                                                |
| Fructoselysine 3-epimerase      | <i>Escherichia coli</i> BL21(DE3)                                           | ACT45027.1       | Wiame E & Van Schaftingen E (2004) <i>Biochem J</i> 378(Pt 3):1047-1052                                                                                                                                                                  |
| Hydroxypyruvate isomerase       | <i>Escherichia coli</i> K-12                                                | P30147.1         | Ashiuchi M & Misono H (1999) <i>Biochim Biophys Acta</i> 1435(1-2):153-159                                                                                                                                                               |
| Hydroxypyruvate isomerase       | <i>Streptomyces coelicolor</i> A3(2)                                        | Q9Z596.1         | Navone L, et al. (2015) <i>Appl Environ Microbiol</i> 81(19):6649-6659                                                                                                                                                                   |
| 2-keto-myo-inositol dehydratase | <i>Bacillus subtilis</i> subsp. <i>subtilis</i> str. 168                    | AIY95289.1       | Yoshida KI, et al. (2004) <i>Microbiology</i> 150(Pt 3):571-580                                                                                                                                                                          |
| 2-keto-myo-inositol dehydratase | <i>Caulobacter vibrioides</i> CB15                                          | AAK23281.1       | Boutte CC, et al. (2008) <i>PLoS Genet</i> 4(12):e1000310                                                                                                                                                                                |
| 2-keto-myo-inositol dehydratase | <i>Citrobacter</i> sp. TBCP-5362                                            | QCQ70428.1       | Yuan C, Yang P, Wang J, & Jiang L (2019) <i>Biochem Biophys Res Commun</i> 517(3):427-432                                                                                                                                                |
| 2-keto-myo-inositol dehydratase | <i>Clostridium perfringens</i> str. 13                                      | BAB79797.1       | Kawsar HI, Ohtani K, Okumura K, Hayashi H, & Shimizu T (2004) <i>FEMS Microbiol Lett</i> 235(2):289-295                                                                                                                                  |
| 2-keto-myo-inositol dehydratase | <i>Corynebacterium glutamicum</i> ATCC 13032                                | AUH99791.1       | Krings E, et al. (2006) <i>J Bacteriol</i> 188(23):8054-8061                                                                                                                                                                             |
| 2-keto-myo-inositol dehydratase | <i>Geobacillus kaustophilus</i> HTA426                                      | BAD76175.1       | Yoshida KI, et al. (2012) <i>Microbiology</i> 158(Pt 8):1942-1952                                                                                                                                                                        |
| 2-keto-myo-inositol dehydratase | <i>Lactobacillus casei</i> BL23                                             | CAQ65355.1       | Yebra MJ, et al. (2007) <i>Appl Environ Microbiol</i> 73(12):3850-3858                                                                                                                                                                   |
| 2-keto-myo-inositol dehydratase | <i>Legionella pneumophila</i> subsp. <i>pneumophila</i> str. Philadelphia 1 | AAU27729.1       | Manske C, Schell U, & Hilbi H (2016) <i>Appl Environ Microbiol</i> 82(16):5000-5014                                                                                                                                                      |
| 2-keto-myo-inositol dehydratase | <i>Mycoplasma hyopneumoniae</i> 7448                                        | AAZ53604.2       | Galvao Ferrarini M, et al. (2018) <i>Mol Microbiol</i> 108(6):683-696                                                                                                                                                                    |

|                                 |                                                                  |                |                                                                                                                                                                                                                               |
|---------------------------------|------------------------------------------------------------------|----------------|-------------------------------------------------------------------------------------------------------------------------------------------------------------------------------------------------------------------------------|
| 2-keto-myo-inositol dehydratase | Propionibacterium freudenreichii subsp. shermanii CIRM-BIA1      | CBL57393.1     | Loux V, et al. (2015) BMC Genomics 16:296                                                                                                                                                                                     |
| 2-keto-myo-inositol dehydratase | Rhizobium leguminosarum bv. viciae 3841                          | CAK06988.1     | Fry J, Wood M, & Poole PS (2001) Mol Plant Microbe Interact 14(8):1016-1025                                                                                                                                                   |
| 2-keto-myo-inositol dehydratase | Salmonella enterica subsp. enterica serovar Typhimurium str. LT2 | AAL23244.1     | Kröger C & Fuchs TM (2009) J Bacteriol 191(2):545-554                                                                                                                                                                         |
| 2-keto-myo-inositol dehydratase | Sinorhizobium meliloti 1021                                      | CAC41789.1     | Kohler PR, Zheng JY, Schoffers E, & Rossbach S (2010) Appl Environ Microbiol 76(24):7972-7980                                                                                                                                 |
| 2-keto-myo-inositol dehydratase | Streptomyces coelicolor A3(2)                                    | CAB88959.1     | Yu L, Gao W, Li S, Pan Y, & Liu G (2016) Microbiology 162(3):537-551                                                                                                                                                          |
| 2-keto-myo-inositol isomerase   | Bacillus subtilis subsp. subtilis str. 168                       | QJF42344.1     | Zhang RG, et al. (2002) Proteins 48(2):423-426; Yoshida K, et al. (2006) Appl Environ Microbiol 72(2):1310-1315                                                                                                               |
| Ketose 3-epimerase              | Agrobacterium fabrum str. C58                                    | AAK88700.1     | Kim K, Kim HJ, Oh DK, Cha SS, & Rhee S (2006) J Mol Biol 361(5):920-931; Kim HJ, Hyun EK, Kim YS, Lee YJ, & Oh DK (2006) Appl Environ Microbiol 72(2):981-985                                                                 |
| Ketose 3-epimerase              | Arthrobacter globiformis M30                                     | BAW27657.1     | Yoshida H, et al. (2018) Acta Crystallogr F Struct Biol Commun 74(Pt 10):669-676; Yoshihara A, et al. (2017) J Biosci Bioeng 123(2):170-176                                                                                   |
| Ketose 3-epimerase              | [Clostridium] bolteae ATCC BAA-613                               | EDP19602.1     | Jia M, et al. (2014) Appl Microbiol Biotechnol 98(2):717-725                                                                                                                                                                  |
| Ketose 3-epimerase              | [Clostridium] scindens ATCC 35704                                | EDS06411.1     | Zhang W, et al. (2013) PLoS One 8(4):e62987                                                                                                                                                                                   |
| Ketose 3-epimerase              | Clostridium sp. BNL1100                                          | AEY67409.1     | Mu W, et al. (2013) Biotechnol Lett 35(9):1481-1486                                                                                                                                                                           |
| Ketose 3-epimerase              | Desmospora sp. 8437                                              | EGK07060.1     | Zhang W, et al. (2013) J Agric Food Chem 61(47):11468-11476                                                                                                                                                                   |
| Ketose 3-epimerase              | Dorea sp. CAG:317                                                | CDD07088.1     | Zhang W, et al. (2015) J Mol Catal B Enzym 120:68-74                                                                                                                                                                          |
| Ketose 3-epimerase              | Flavonifractor plautii ATCC 29863                                | EHM40452.1     | Park CS, et al. (2016) PLoS One 11(7):e0160044                                                                                                                                                                                |
| Ketose 3-epimerase              | Mesorhizobium japonicum MAFF 303099                              | BAB50456.1     | Uechi K, Sakuraba H, Yoshihara A, Morimoto K, & Takata G (2013) Acta Crystallogr D Biol Crystallogr 69(Pt 12):2330-2339; Uechi K, Takata G, Fukai Y, Yoshihara A, & Morimoto K (2013) Biosci Biotechnol Biochem 77(3):511-515 |
| Ketose 3-epimerase              | Pseudomonas cichorii ST-24                                       | BAA24429.1     | Yoshida H, et al. (2007) J Mol Biol 374(2):443-453; Itoh H, et al. (1994) Biosci Biotechnol Biochem 58:2168-2171                                                                                                              |
| Ketose 3-epimerase              | Rhodobacter sphaeroides SK-011                                   | ACO59490.1     | Zhang L, Mu W, Jiang B, & Zhang T (2009) Biotechnol Lett 31(6):857-862                                                                                                                                                        |
| Ketose 3-epimerase              | Ruminiclostridium cellulolyticum H10                             | ACL75304.1     | Chan HC, et al. (2012) Protein Cell 3(2):123-131; Mu W, et al. (2011) J Agric Food Chem 59(14):7785-7792                                                                                                                      |
| Ketose 3-epimerase              | Ruminococcus sp. 5_1_39BFAA                                      | EES75522.1     | Zhu Y, et al. (2012) Biotechnol Lett 34(10):1901-1906                                                                                                                                                                         |
| Ketose 3-epimerase              | Sinorhizobium sp. RAC02                                          | AOF93213.1     | Zhu Z, et al. (2019) RSC Adv 9:2919-2927                                                                                                                                                                                      |
| Ketose 3-epimerase              | Treponema primitia ZAS-1                                         | WP_010256447.1 | Zhang W, Zhang T, Jiang B, & Mu W (2016) J Sci Food Agric 96(1):49-56                                                                                                                                                         |
| Xylose Isomerase                | Actinoplanes missouriensis 431                                   | P12851.3       | Jenkins J, et al. (1992) Biochemistry 31(24):5449-5458; van Tilbeurgh H, et al. (1992) Biochemistry 31(24):5467-5471                                                                                                          |
| Xylose Isomerase                | Actinoplanes sp. ATCC 31351                                      | AAA92578.1     | Saari GC, Kumar AA, Kawasaki GH, Insley MY, & O'Hara PJ (1987) J Bacteriol 169(2):612-618                                                                                                                                     |
| Xylose Isomerase                | Arthrobacter sp. NRRL B3728                                      | P12070.3       | Collyer CA, Henrick K, & Blow DM (1990) J Mol Biol 212(1):211-235; Rangarajan M & Hartley BS (1992) Biochem J 283 ( Pt 1):223-233                                                                                             |
| Xylose Isomerase                | Bacillus subtilis subsp. spizizenii ATCC 6633                    | EFG92849.1     | Amore R, Wilhelm M, & Hollenberg CP (1989) Appl Microbiol Biotechnol 30:351-357                                                                                                                                               |
| Xylose Isomerase                | Bacteroides stercoris HJ-15                                      | AEK21499.1     | Ha SJ, Kim SR, Choi JH, Park MS, & Jin YS (2011) Appl Microbiol Biotechnol 92(1):77-84                                                                                                                                        |
| Xylose Isomerase                | Burkholderia cenocepacia J2315                                   | B4ENA5.1       | Vieira IPV, et al. (2019) AMB Express 9(1):73                                                                                                                                                                                 |
| Xylose Isomerase                | Escherichia coli K-12                                            | AMH36887.1     | Batt CA, Jamieson AC, & Vandeyar MA (1990) Proc Natl Acad Sci U S A 87(2):618-622                                                                                                                                             |



|                            |                                                     |            |                                                                                                                                                                |
|----------------------------|-----------------------------------------------------|------------|----------------------------------------------------------------------------------------------------------------------------------------------------------------|
| Xylose Isomerase           | <i>Lachnoclostridium phytofermentans</i> ISDg       | ABX41597.1 | Seike T, et al. (2019) <i>Biotechnol Biofuels</i> 12:139                                                                                                       |
| Xylose Isomerase           | <i>Lactobacillus reuteri</i> KLR1002                | OTA44610.1 | Staudigl P, Haltrich D, & Peterbauer CK (2014) <i>J Agric Food Chem</i> 62(7):1617-1624                                                                        |
| Xylose Isomerase           | <i>Lactococcus lactis</i> subsp. <i>lactis</i> IO-1 | BAL51426.1 | Park JH & Batt CA (2004) <i>Appl Environ Microbiol</i> 70(7):4318-4325                                                                                         |
| Xylose Isomerase           | <i>Pectobacterium atrosepticum</i> SCRI1043         | CAG73017.1 | Sapunova LI, Lobanok AG, Kazakevich IO, Shliakhotko EA, & Evtushenkov AN (2006) <i>Appl Biochem Microbiol</i> 42(3):246-251                                    |
| Xylose Isomerase           | <i>Streptomyces rubiginosus</i>                     | AAA26838.1 | Whitlow M, et al. (1991) <i>Proteins</i> 9(3):153-173; Waltman MJ, Yang ZK, Langan P, Graham DE, & Kovalevsky A (2014) <i>Protein Eng Des Sel</i> 27(2):59-64  |
| Xylose Isomerase           | <i>Streptomyces violaceoruber</i> S21               | ARF65364.1 | Callens M, Kersters-Hilderson H, Van Opstal O, & De Bruyne CK (1996) <i>Enzyme Microb Technol</i> 8:696-700                                                    |
| Xylose Isomerase           | <i>Streptomyces violaceusniger</i>                  | AAA26839.1 | Lavie A, Allen KN, Petsko GA, & Ringe D (1994) <i>Biochemistry</i> 33:5469-5480; Suekane M, Tamura M, & Tomimura C (1978) <i>Agric Biol Chem</i> 42(5):909-917 |
| Xylose Isomerase           | <i>Thermoanaerobacter ethanolicus</i> JW 200        | ACU01780.1 | Fan L, Zhang Y, Qu W, Wang J, & Shao W (2011) <i>Biotechnol Lett</i> 33(3):593-598                                                                             |
| Xylose Isomerase           | <i>Thermoanaerobacterium saccharolyticum</i> PB8    | AIE39924.1 | Lee YE, Ramesh MV, & Zeikus JG (1993) <i>J Gen Microbiol</i> 139 Pt 6:1227-1234                                                                                |
| Xylose Isomerase           | <i>Thermotoga neapolitana</i> 5068                  | AAB06798.1 | Vieille C, Hess JM, Kelly RM, & Zeikus JG (1995) <i>Appl Environ Microbiol</i> 61(5):1867-1875                                                                 |
| Xylose Isomerase           | <i>Thermus thermophilus</i> HB8                     | BAL42599.1 | Lehmacher A & Bisswanger H (1990) <i>Biol Chem Hoppe Seyler</i> 371(6):527-536                                                                                 |
| Xylose Isomerase           | <i>Vibrio</i> sp. XY-214                            | BAI23199.1 | Umemoto Y, Shibata T, & Araki T (2012) <i>Mar Biotechnol (NY)</i> 14(1):10-20                                                                                  |
| L-xylulose-5-P 3-epimerase | <i>Escherichia coli</i> O157:H7 str. EDL933         | AAG59393.1 | Shi R, et al. (2008) <i>J Bacteriol</i> 190(24):8137-8144; Yew WS & Gerlt JA (2002) <i>J Bacteriol</i> 184(1):302-306                                          |
| L-xylulose-5-P 3-epimerase | <i>Klebsiella pneumoniae</i> ATCC 13882             | ABF60040.1 | Campos E, et al. (2008) <i>J Bacteriol</i> 190(20):6615-6624                                                                                                   |
